# Supplementary material
Source: PubMed Central journal article supplement (PMC4149473)
Supplement: NIHMS607085-supplement-Supp_Info.pdf [file NIHMS607085-supplement-Supp_Info.pdf]

# **Supplementary Information**

## **Supplementary Figures**

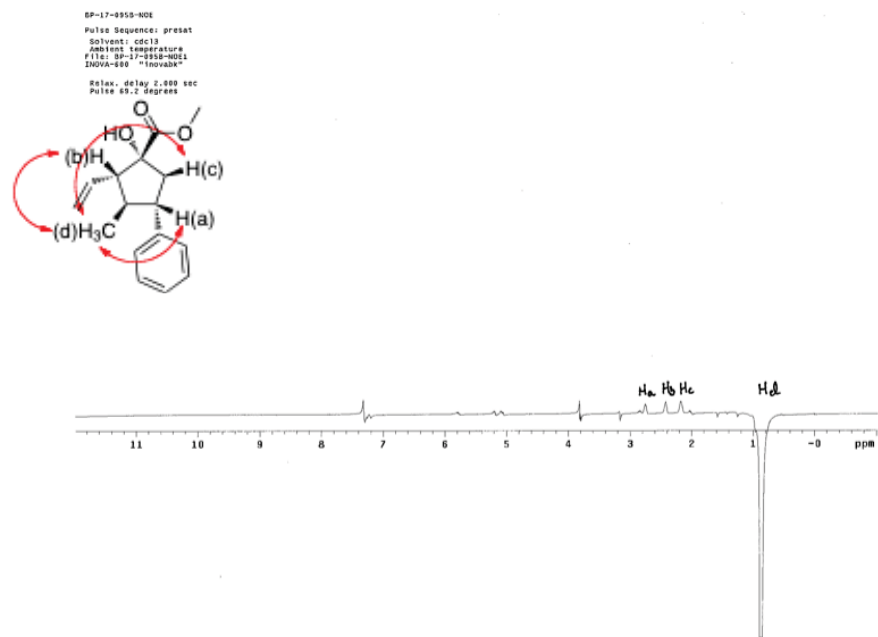

Supplementary Figure 1. 1D-nOe Spectrum of 15

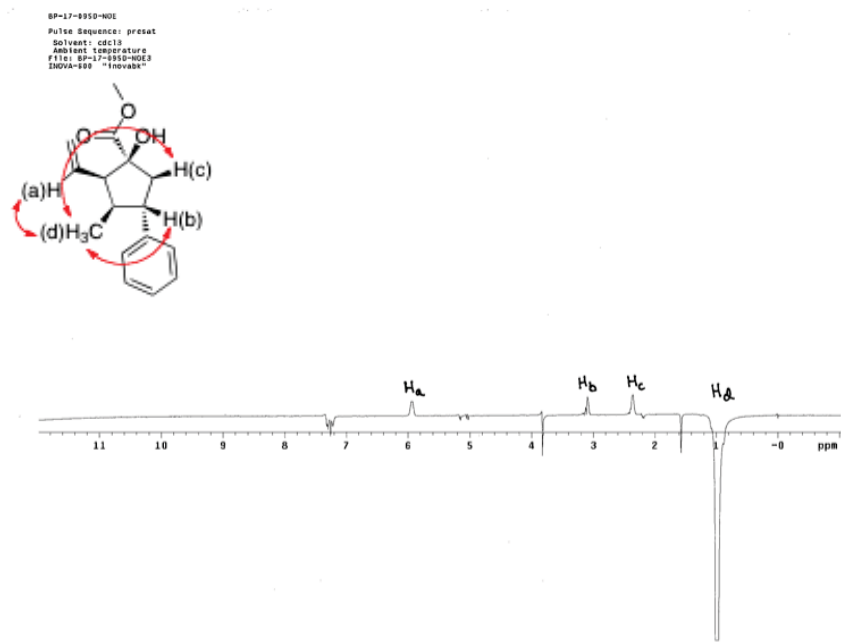

Supplementary Figure 2. 1D-nOe Spectrum of *epi-15*

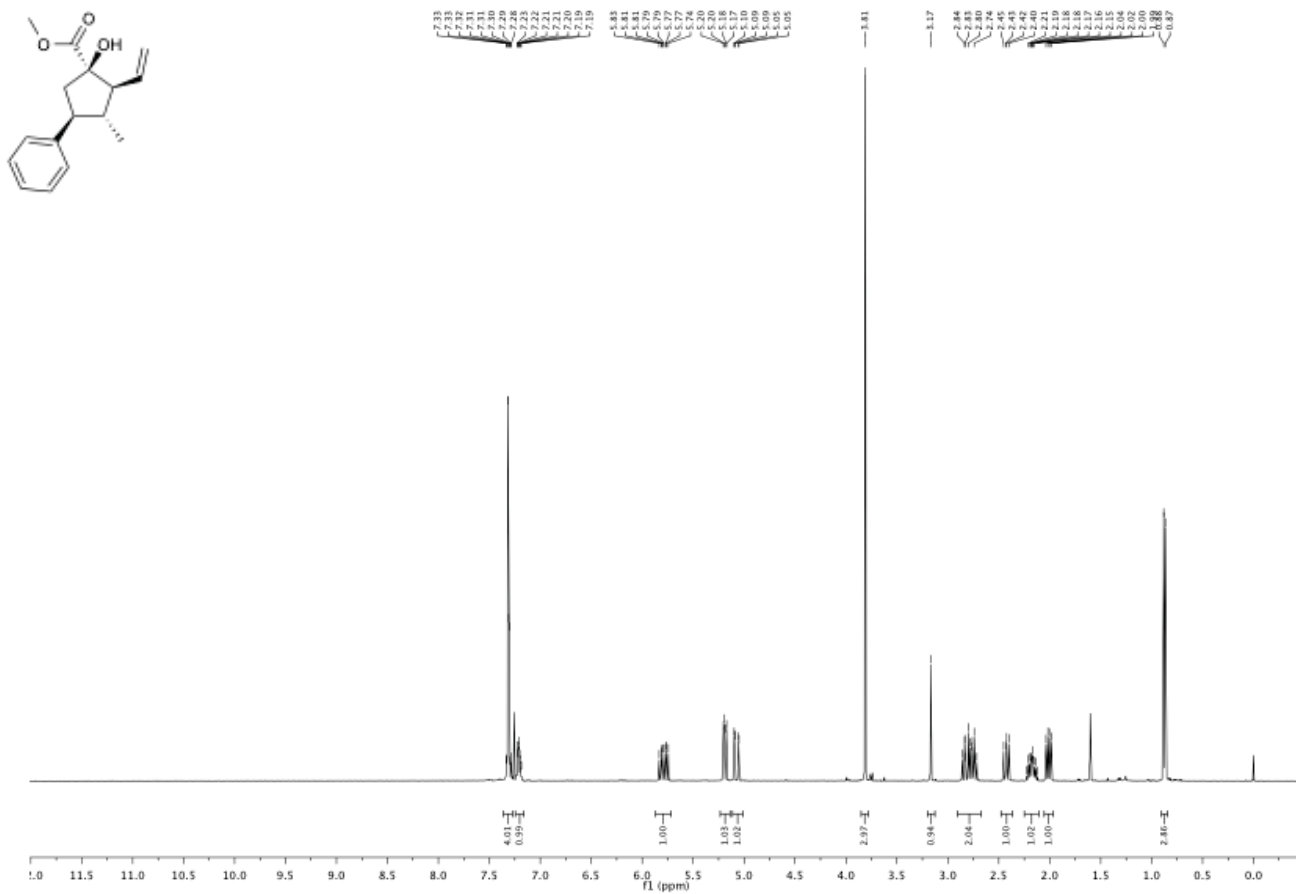

Supplementary Figure 3. <sup>1</sup>H NMR Spectrum of 15

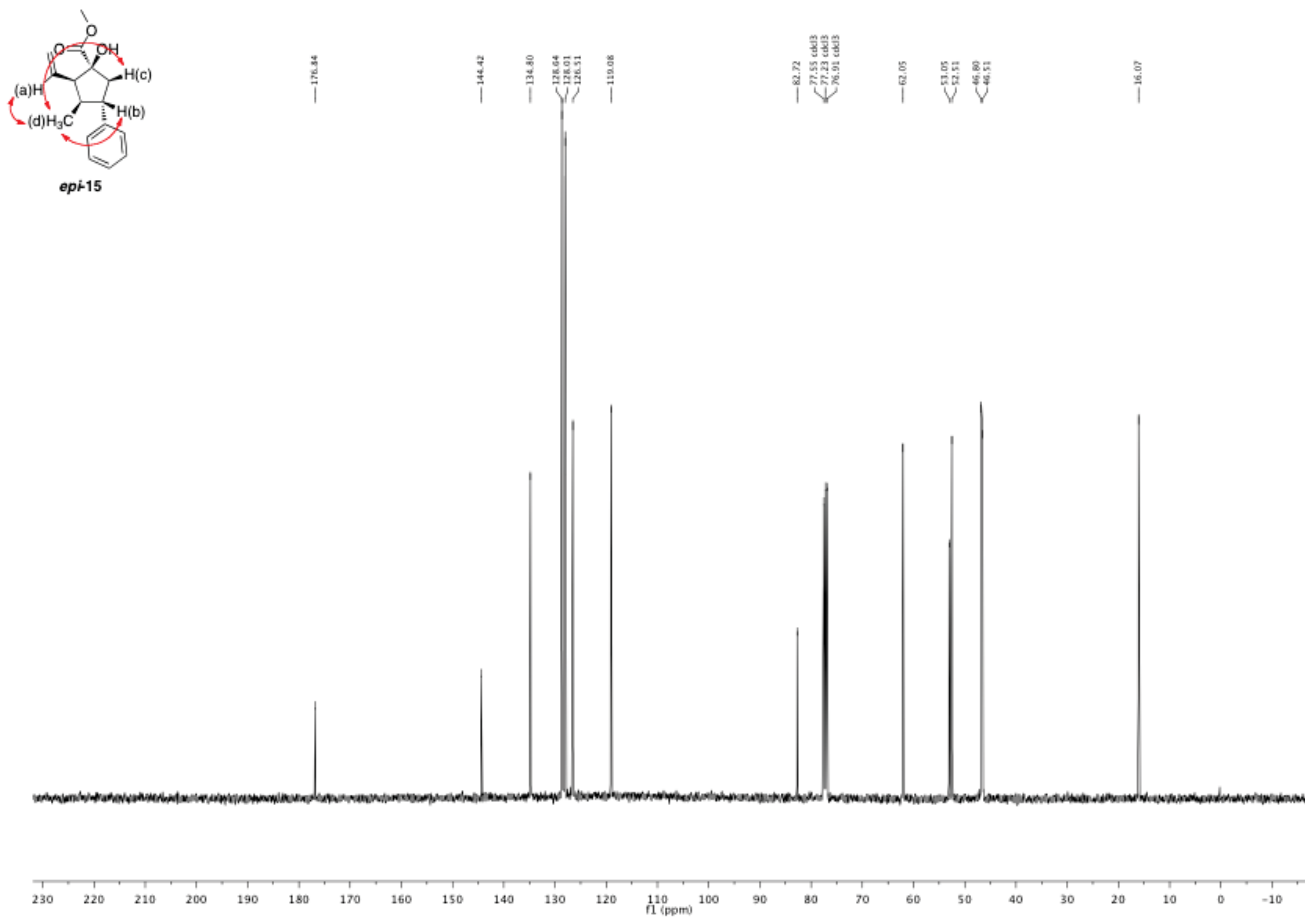

Supplementary Figure 4.  $^{13}\text{C}$  NMR Spectrum of 15

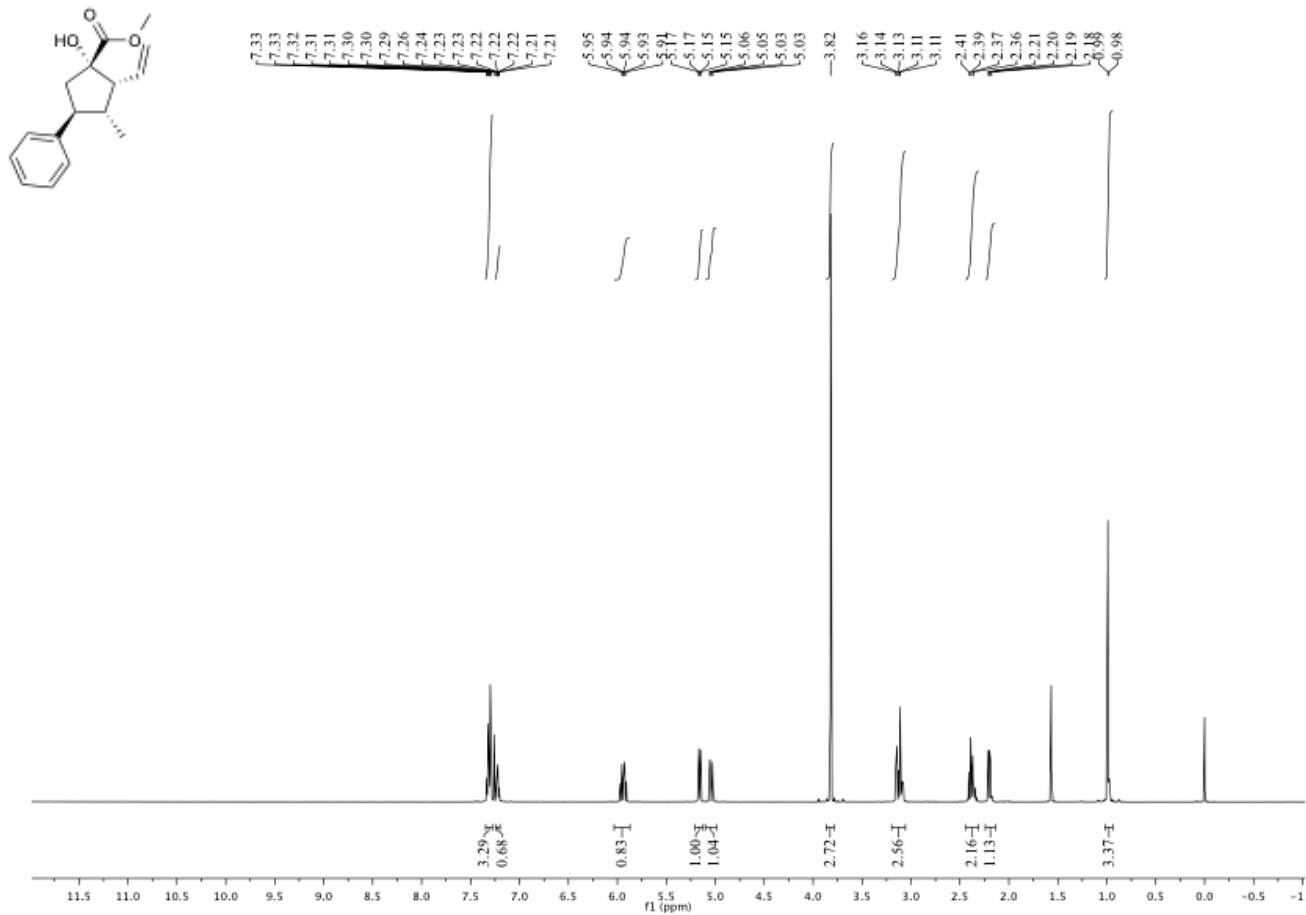

Supplementary Figure 5. <sup>1</sup>H NMR Spectrum of *epi-15*

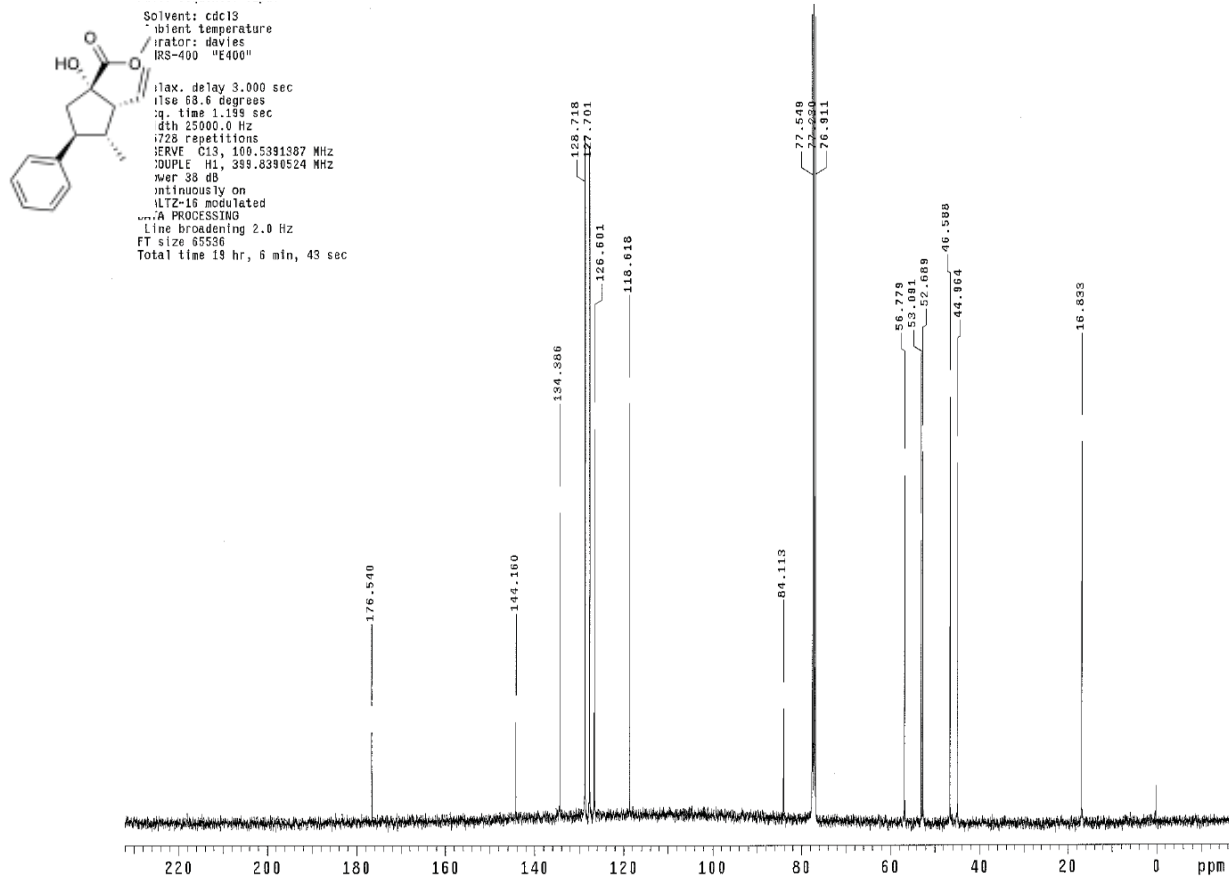

Supplementary Figure 6. <sup>13</sup>C NMR Spectrum of *epi-15*

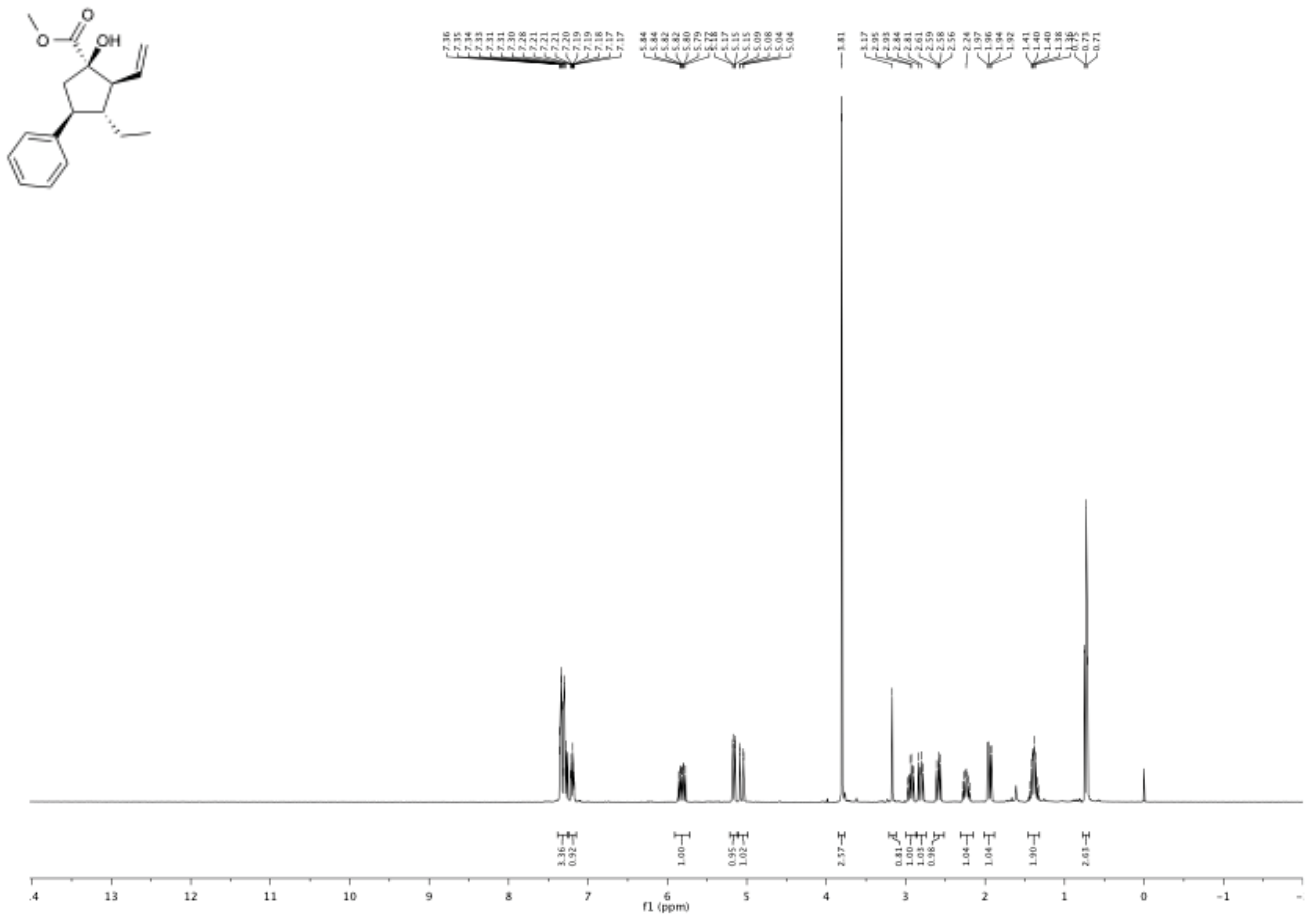

Supplementary Figure 7. <sup>1</sup>H NMR Spectrum of 18a



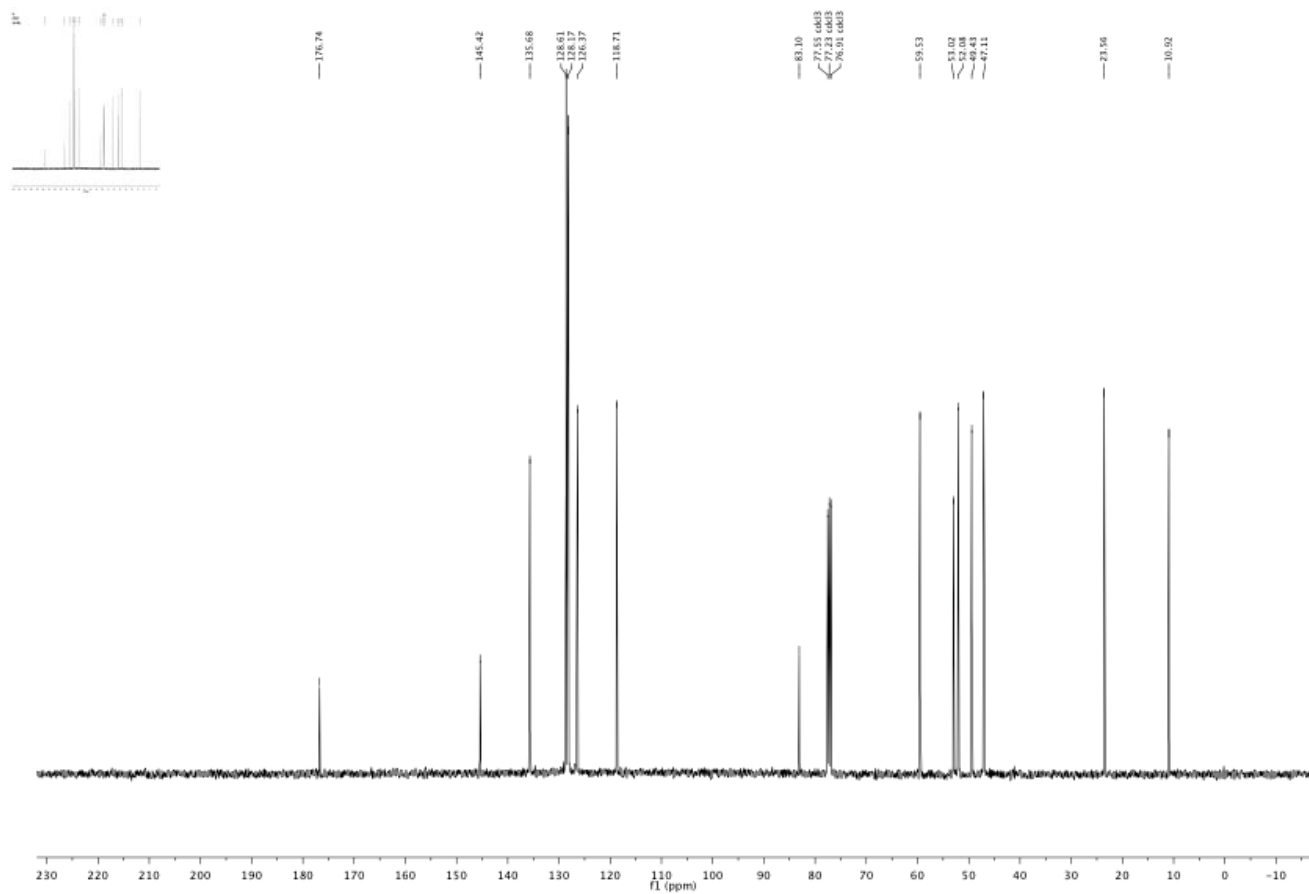

Supplementary Figure 8.  $^{13}\text{C}$  NMR Spectrum of 18a

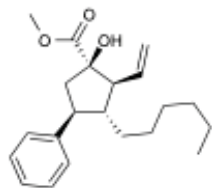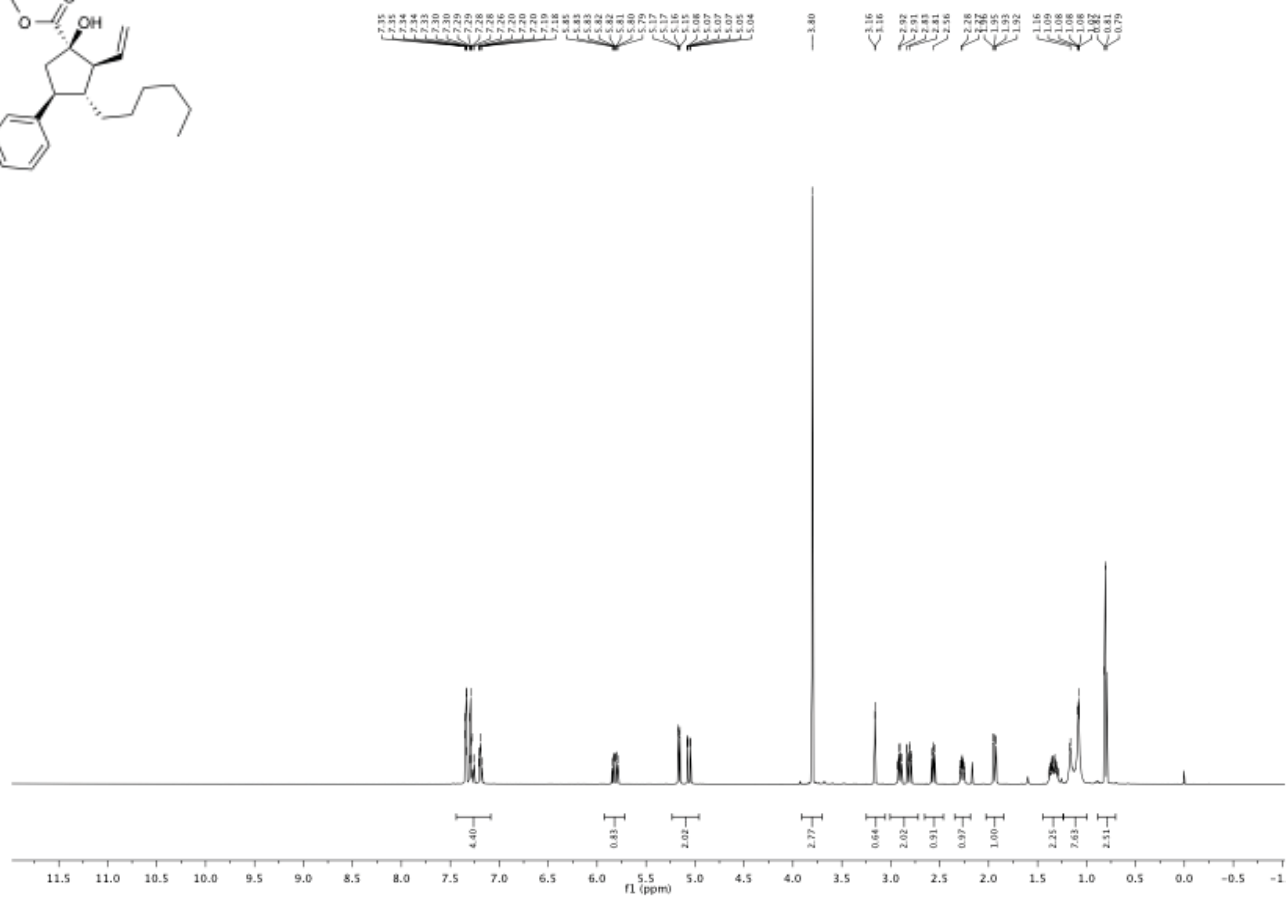

Supplementary Figure 9. <sup>1</sup>H NMR Spectrum of 18b

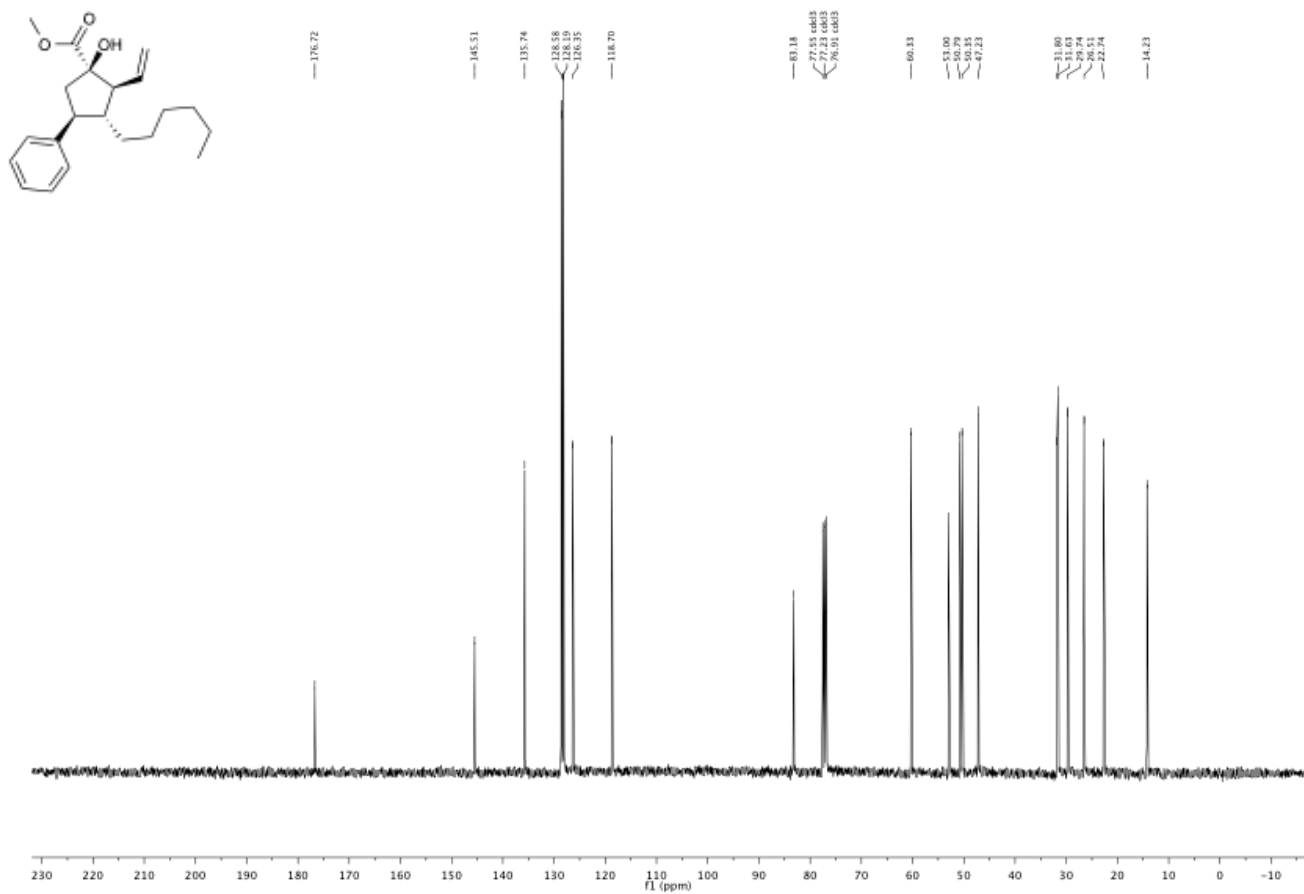

Supplementary Figure 10. <sup>13</sup>C NMR Spectrum of 18b

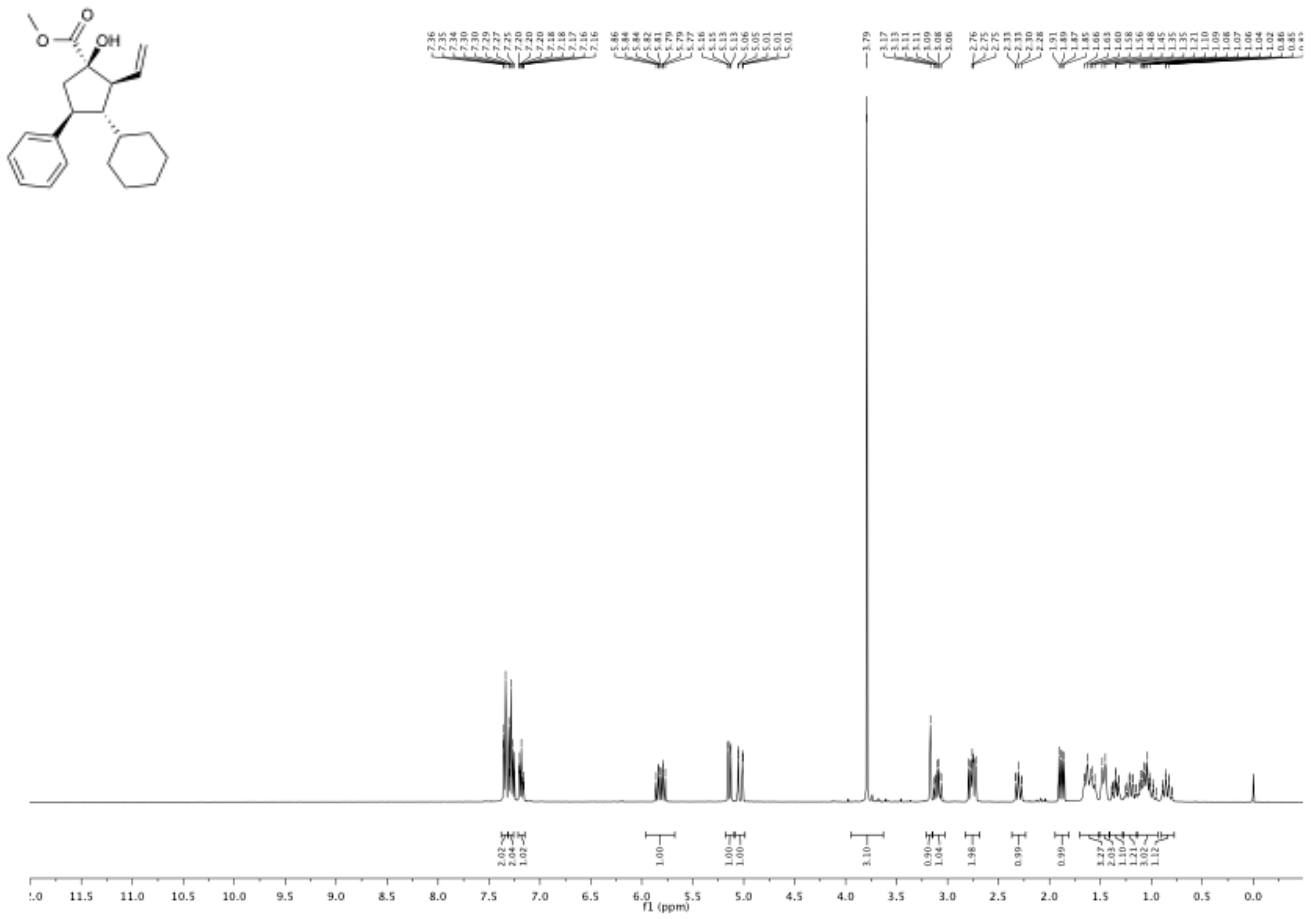

Supplementary Figure 11. <sup>1</sup>H NMR Spectrum of 18c

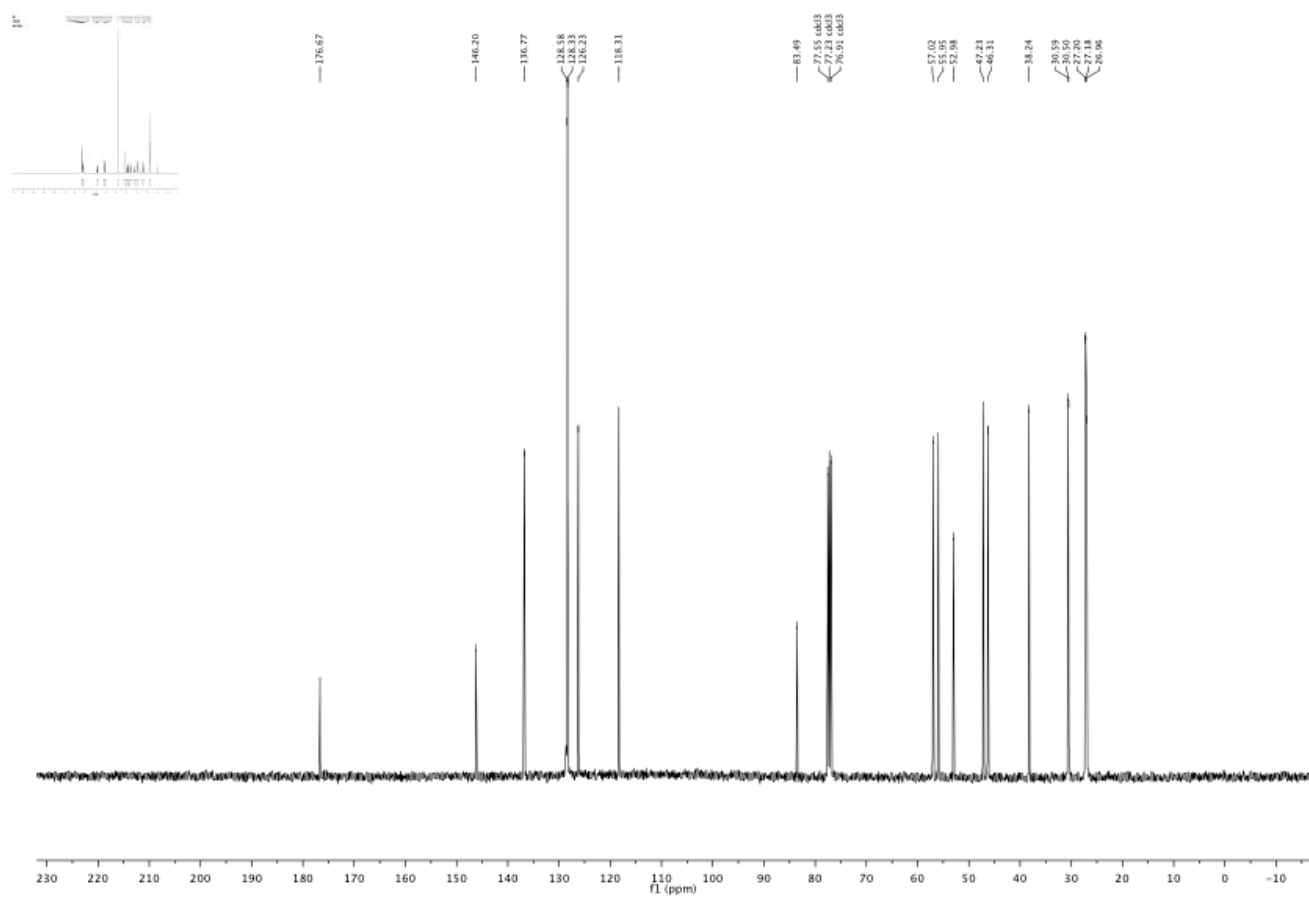

Supplementary Figure 12.  $^{13}\text{C}$  NMR Spectrum of 18c



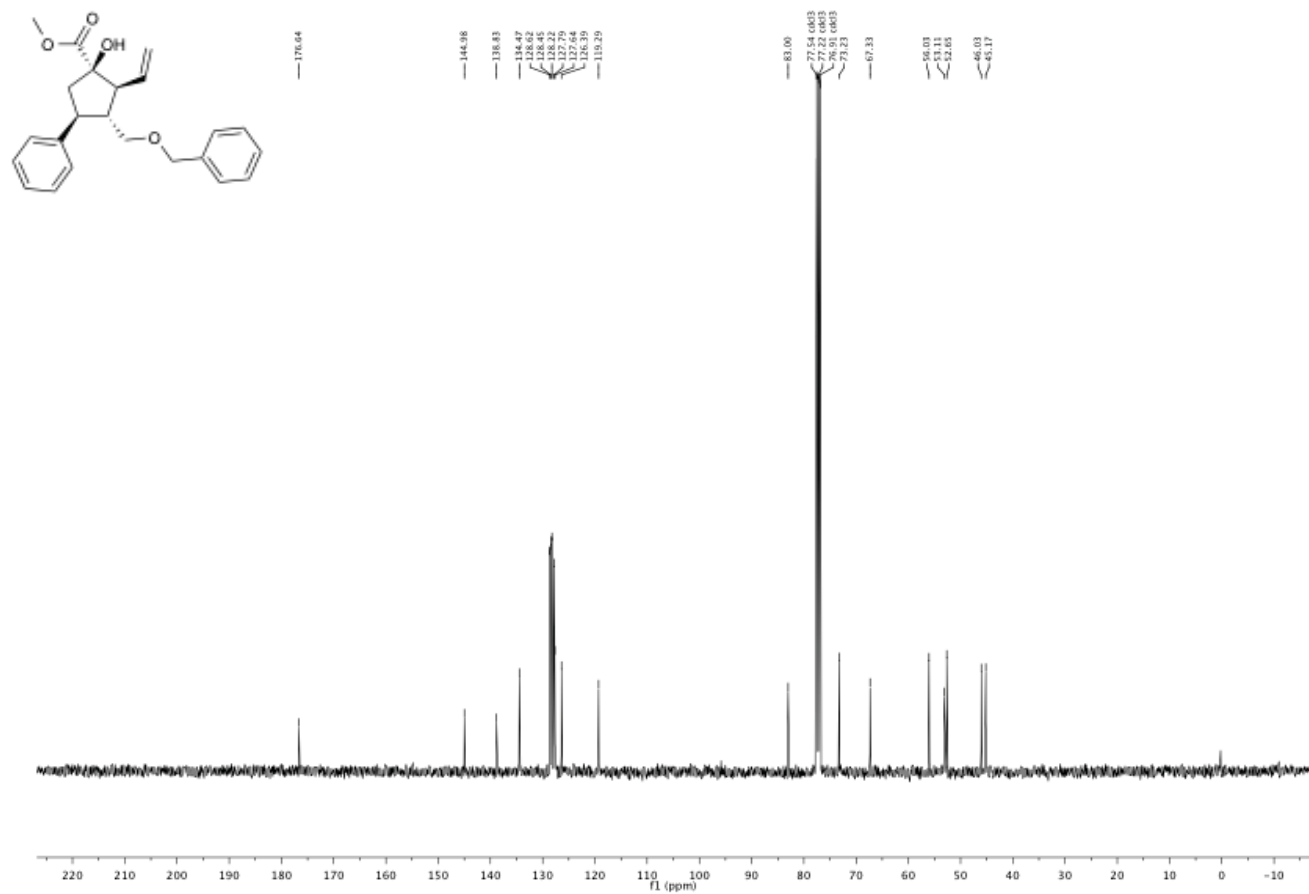

Supplementary Figure 14.  $^{13}\text{C}$  NMR Spectrum of 18d

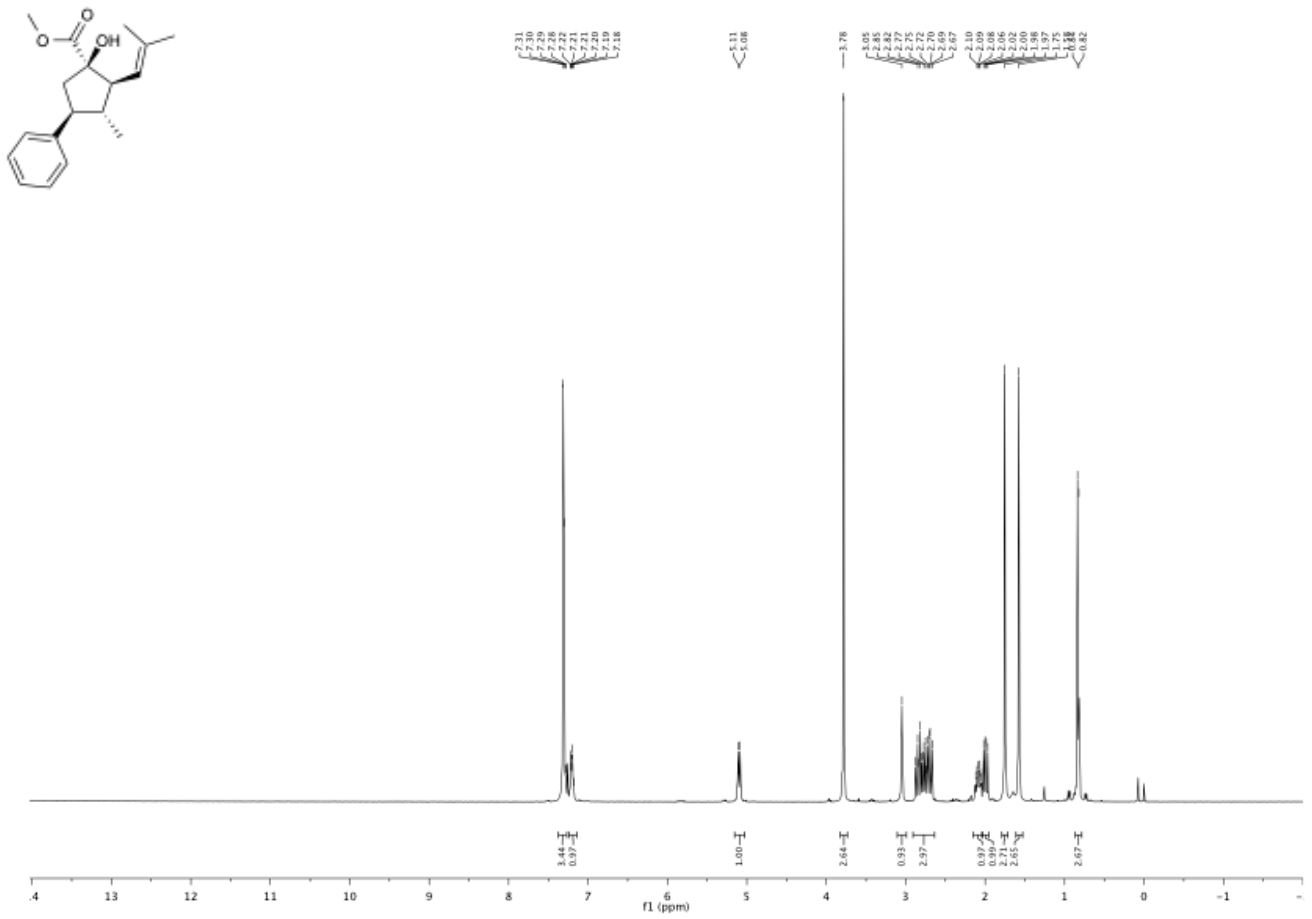

Supplementary Figure 15. <sup>1</sup>H NMR Spectrum of 20a



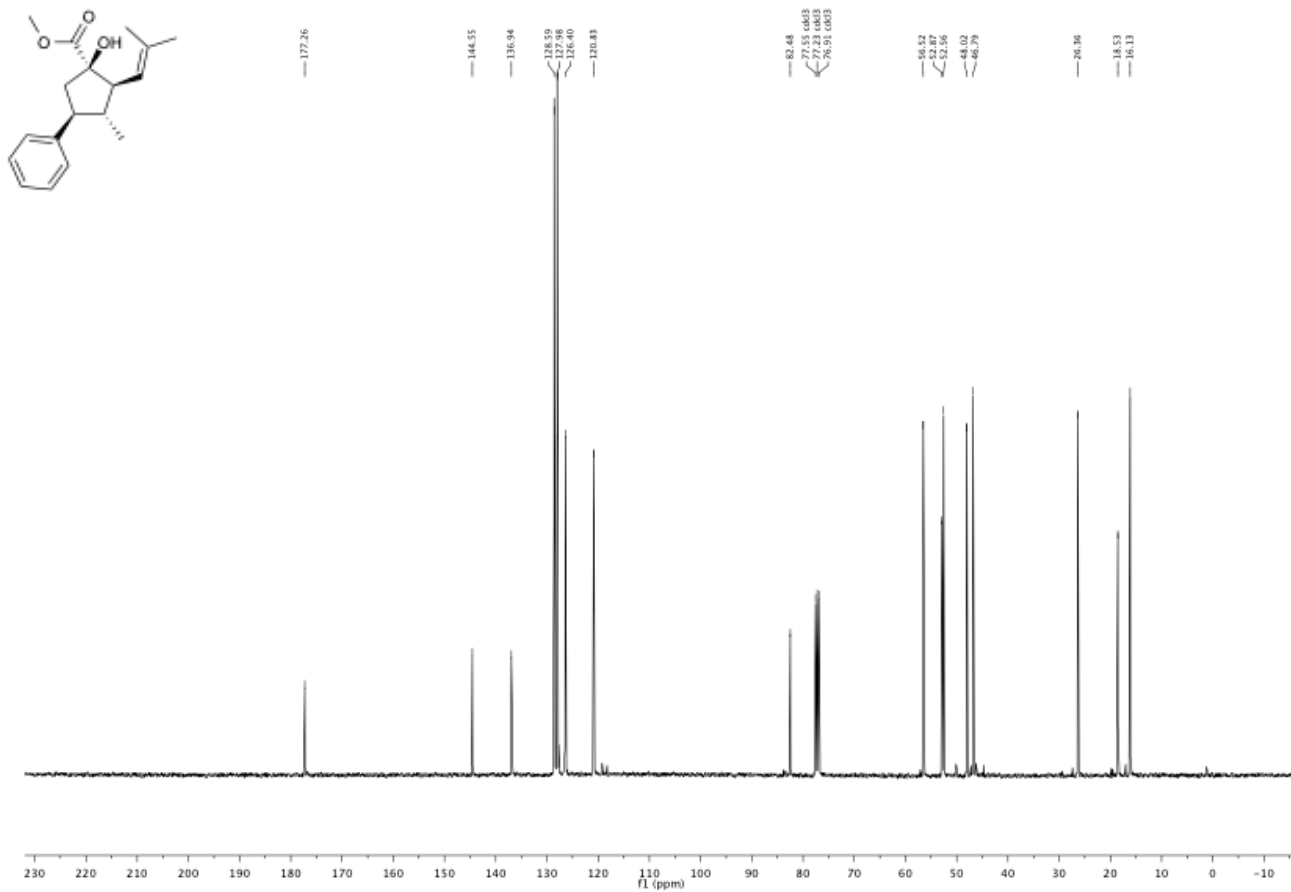

Supplementary Figure 16. <sup>13</sup>C NMR Spectrum of 20a

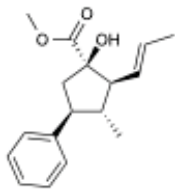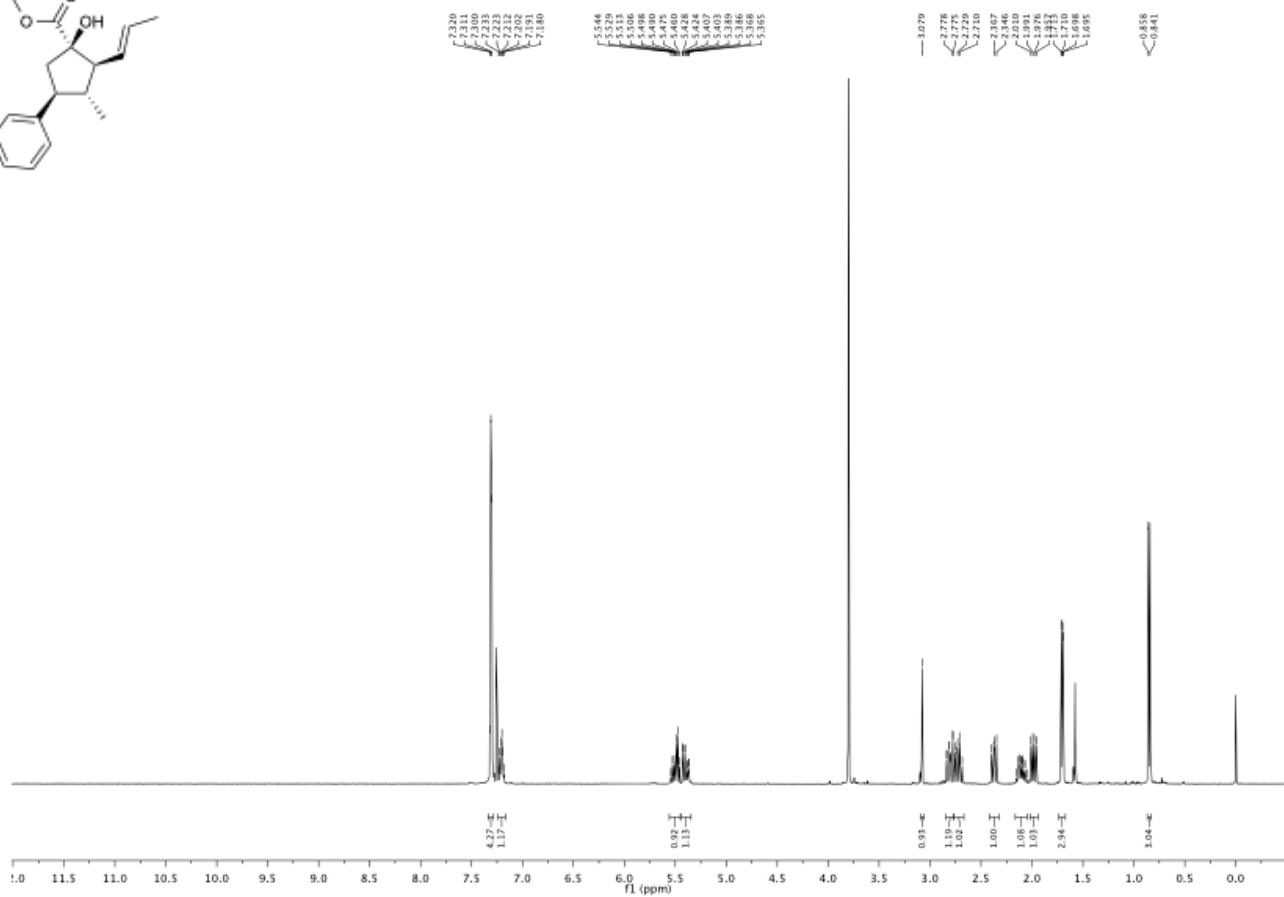

Supplementary Figure 17.  $^1\text{H}$  NMR Spectrum of 20b

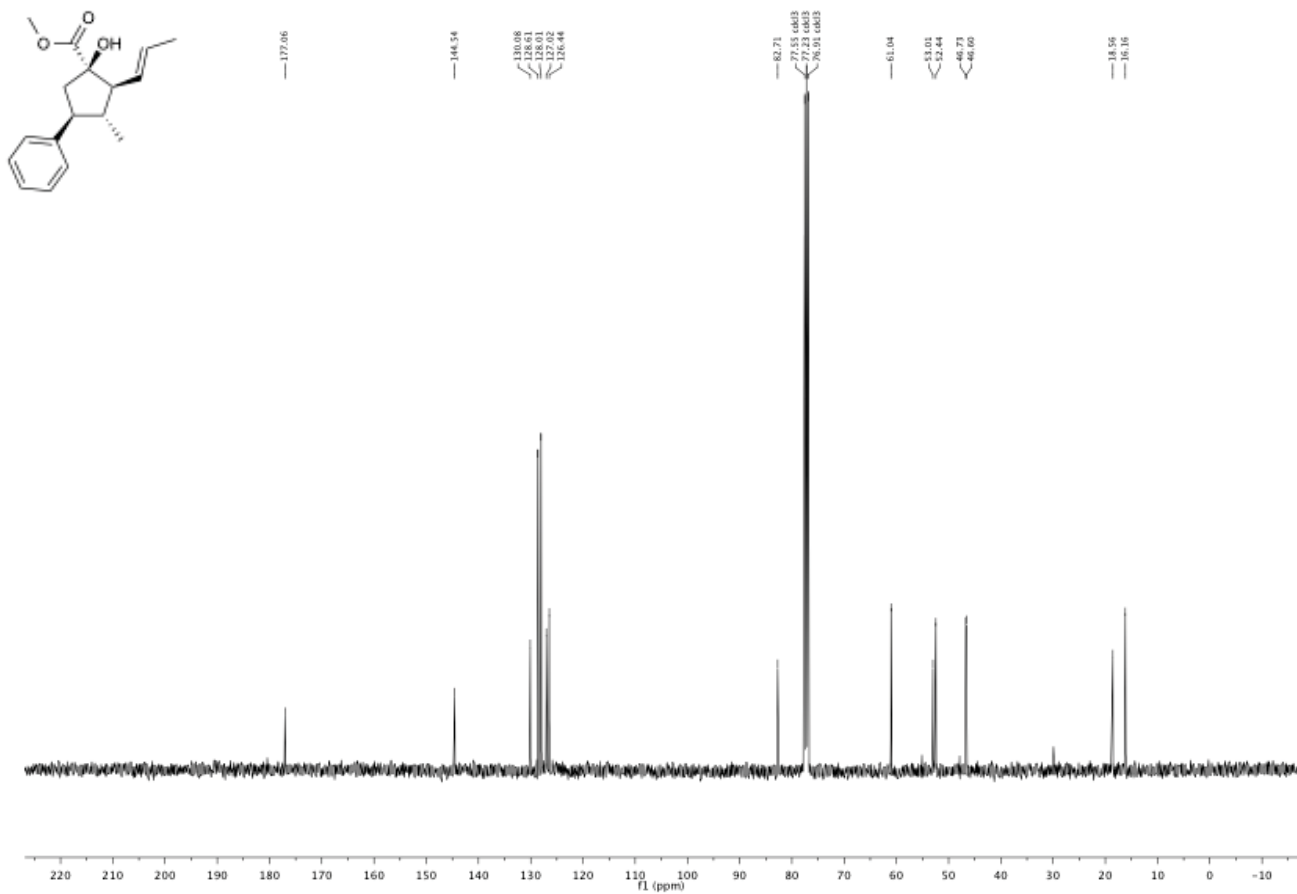

Supplementary Figure 18. <sup>13</sup>C NMR Spectrum of 20b

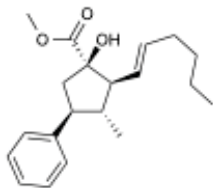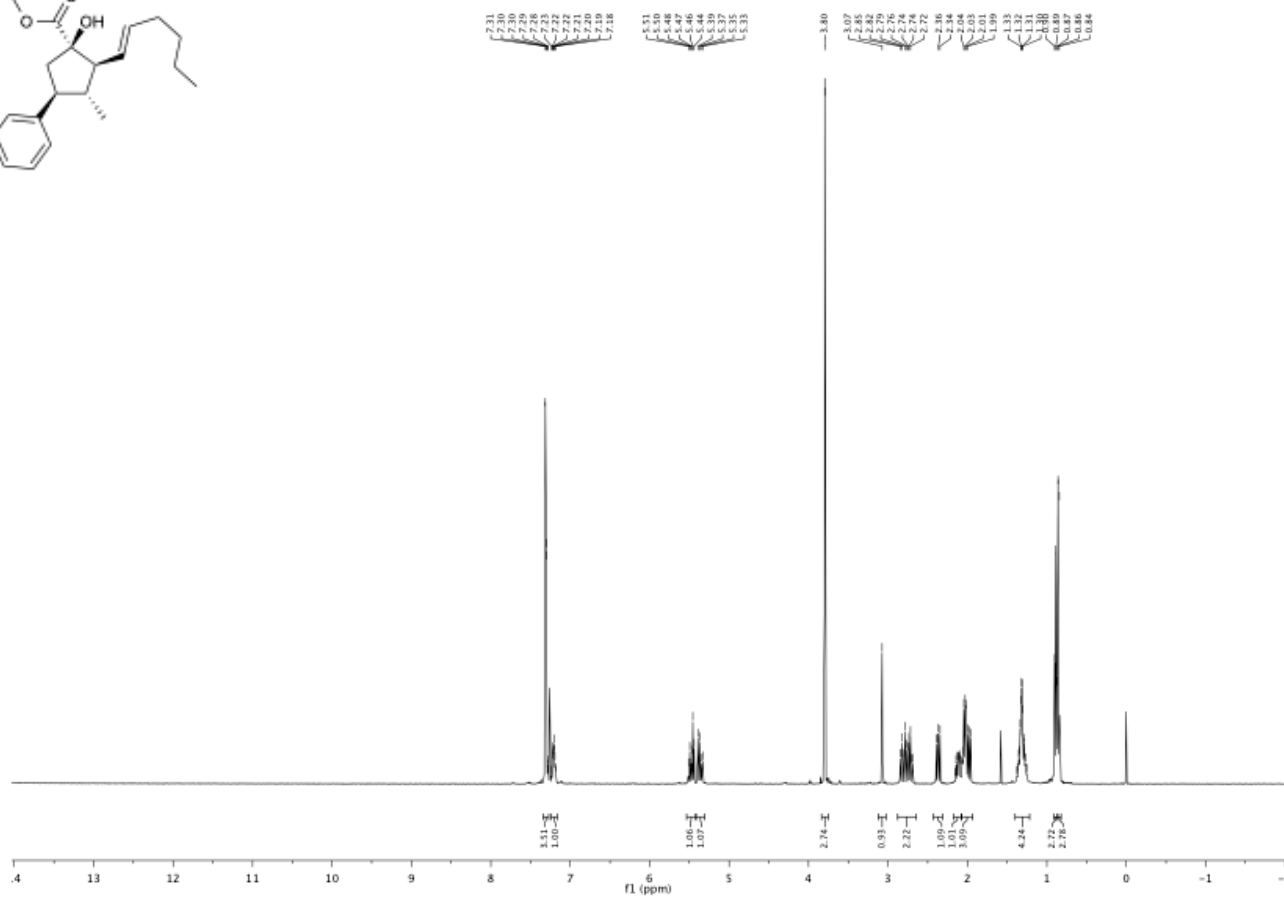

Supplementary Figure 19. <sup>1</sup>H NMR Spectrum of 20c

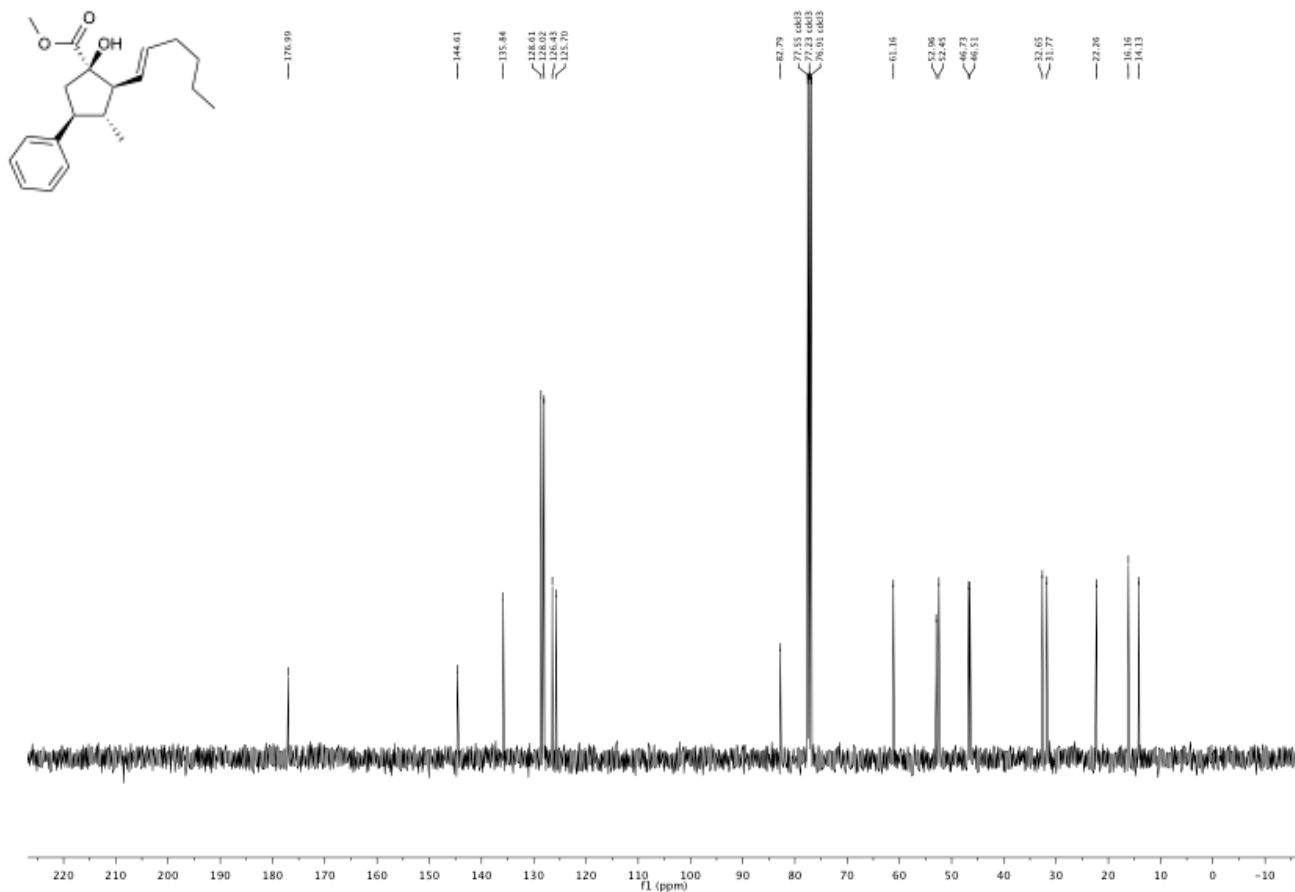

Supplementary Figure 20. <sup>13</sup>C NMR Spectrum of 20c

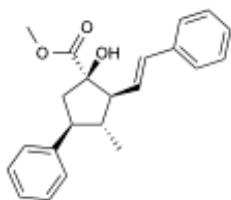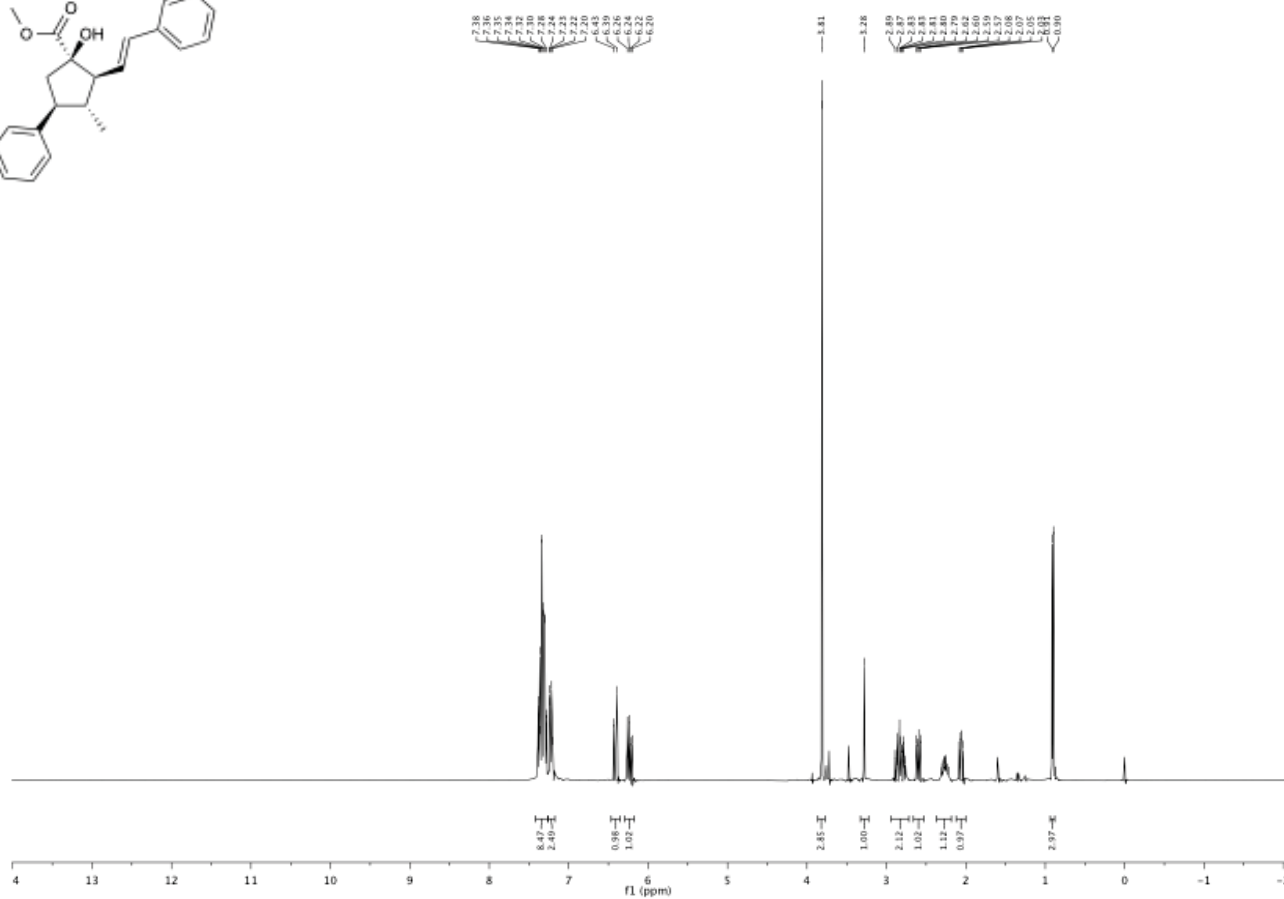

Supplementary Figure 21.  $^1\text{H}$  NMR Spectrum of 20d

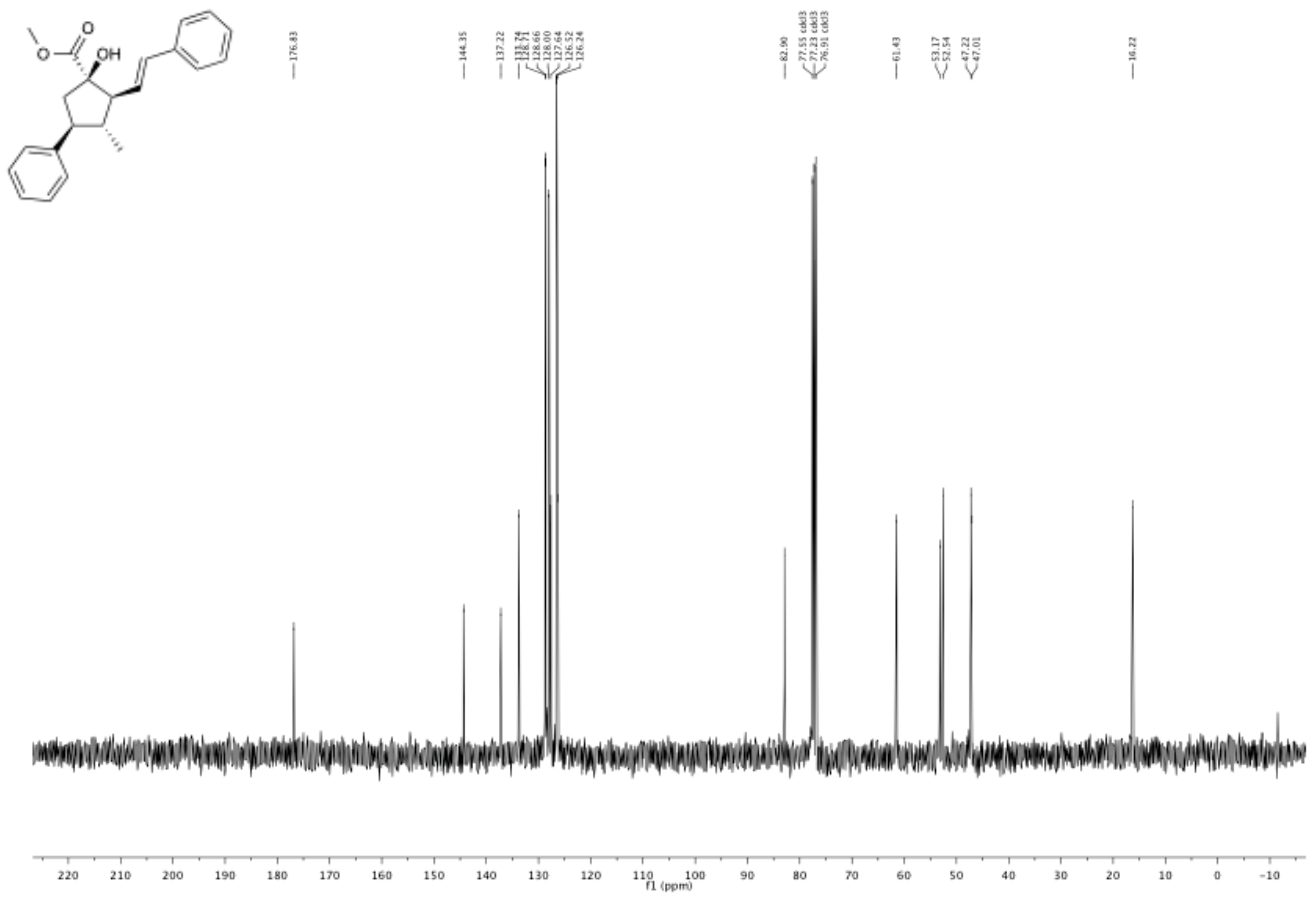

Supplementary Figure 22. <sup>13</sup>C NMR Spectrum of 20d

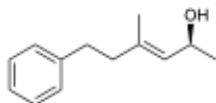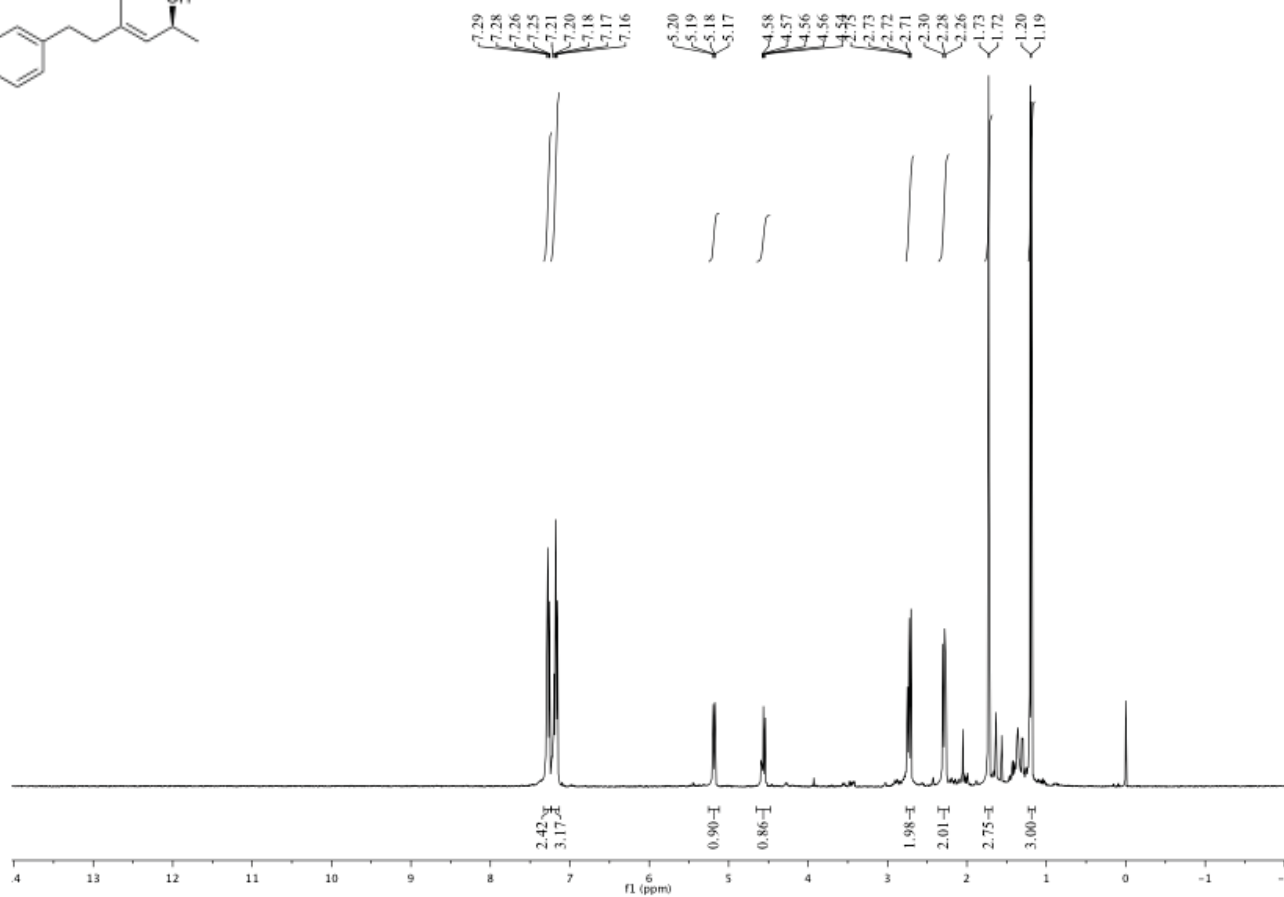

Supplementary Figure 23.  $^1\text{H}$  NMR Spectrum of 23c



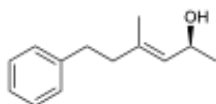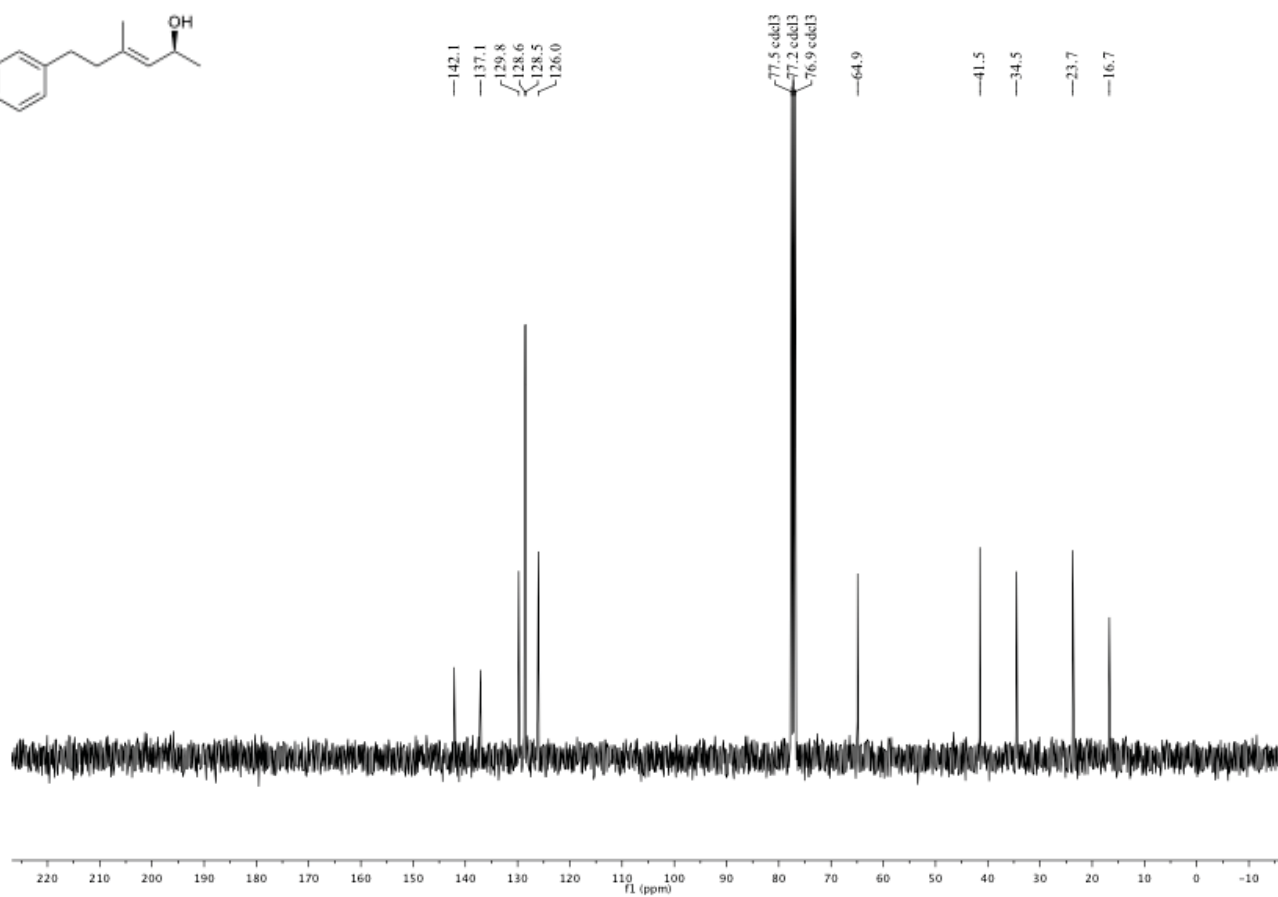

Supplementary Figure 24.  $^{13}\text{C}$  NMR Spectrum of 23c



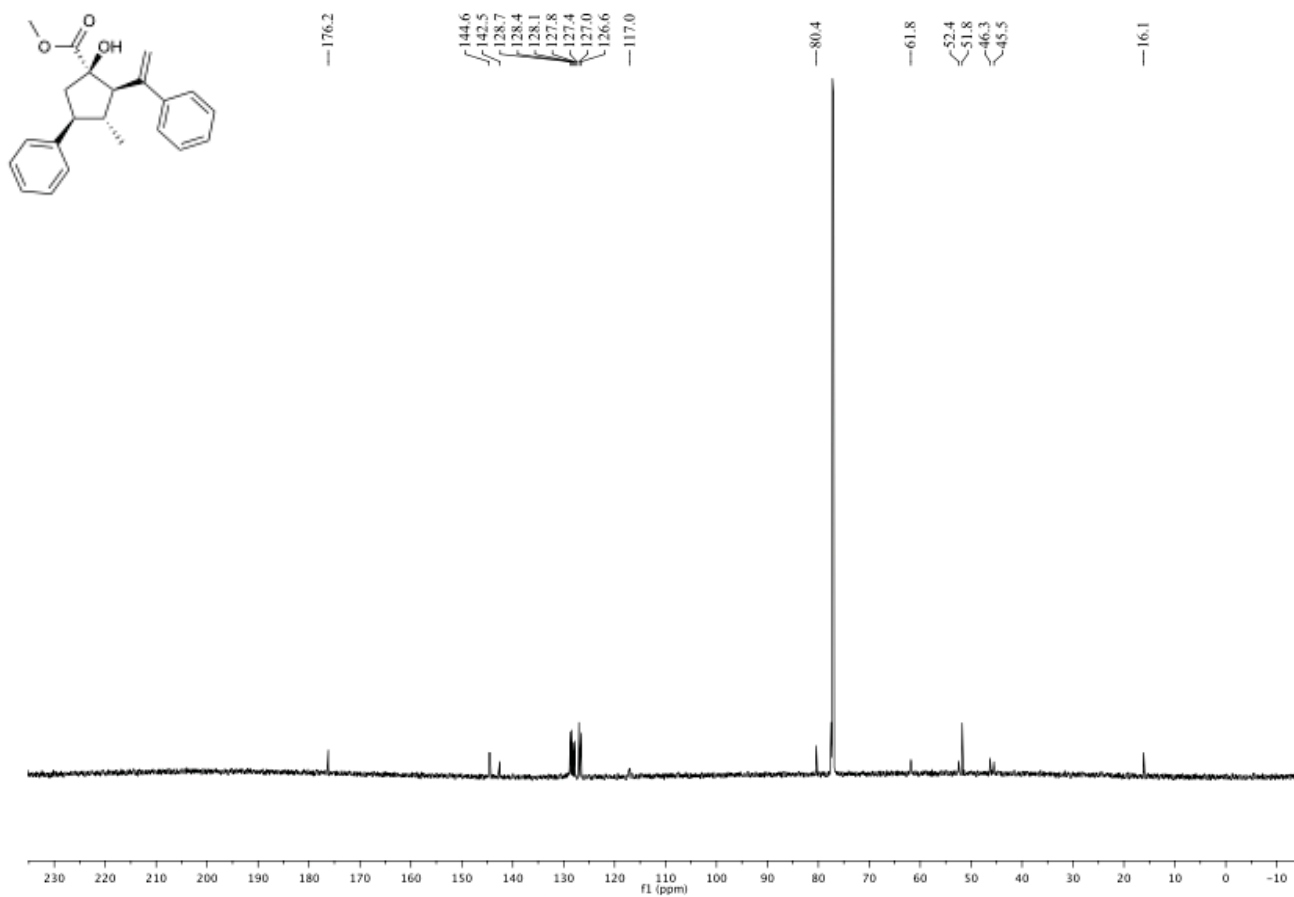

Supplementary Figure 26. <sup>13</sup>C NMR Spectrum of 24a

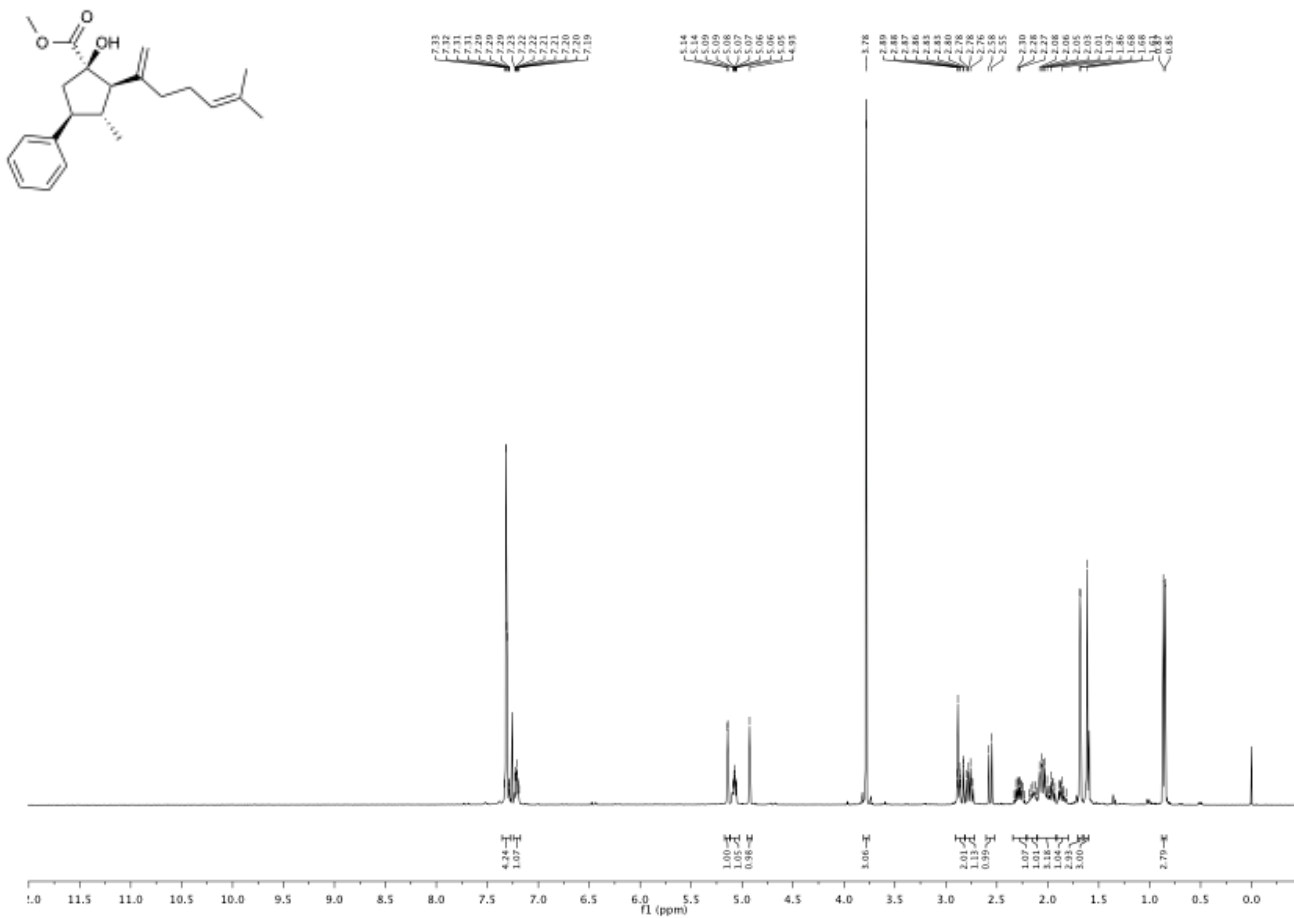

Supplementary Figure 27. <sup>1</sup>H NMR Spectrum of 24b

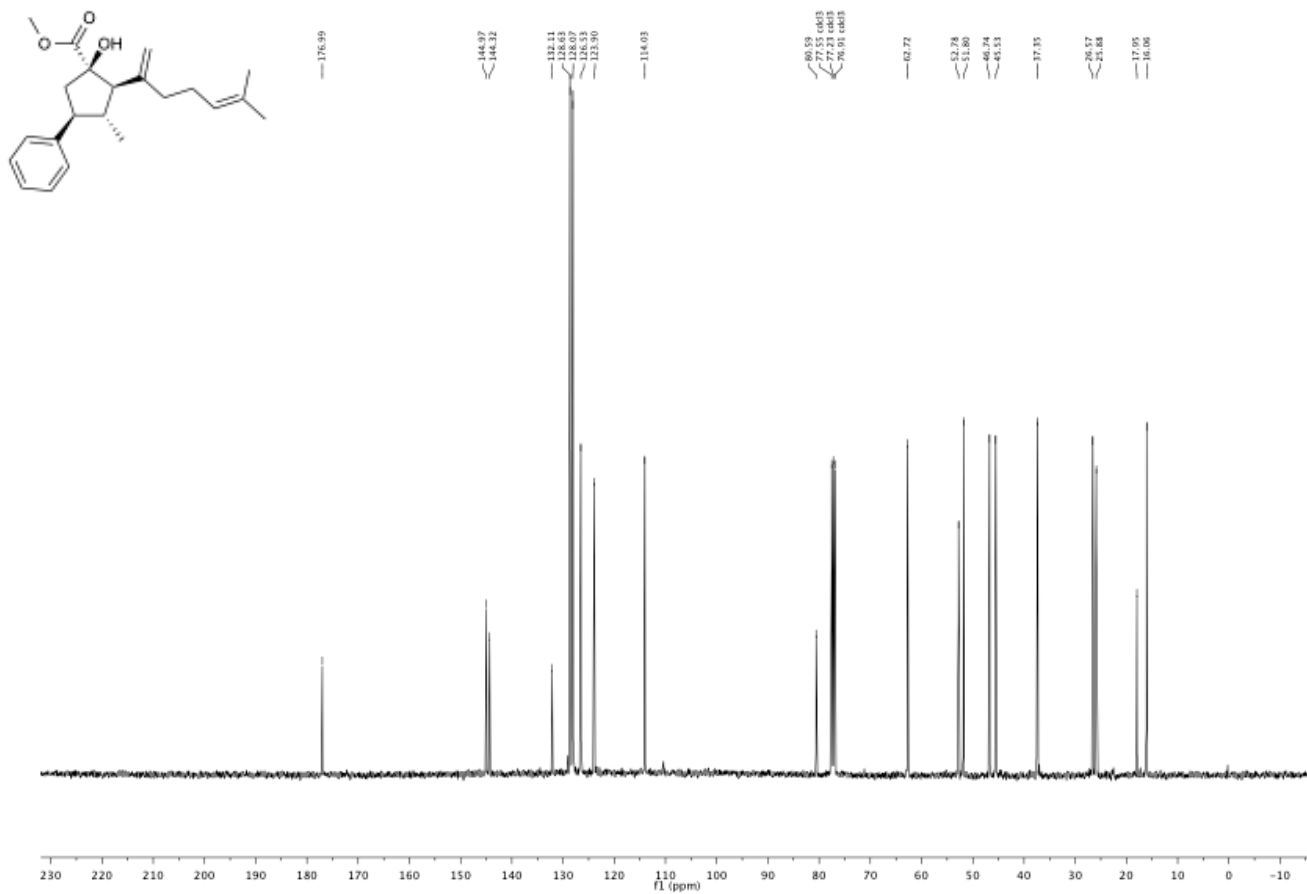

Supplementary Figure 28. <sup>13</sup>C NMR Spectrum of 24b

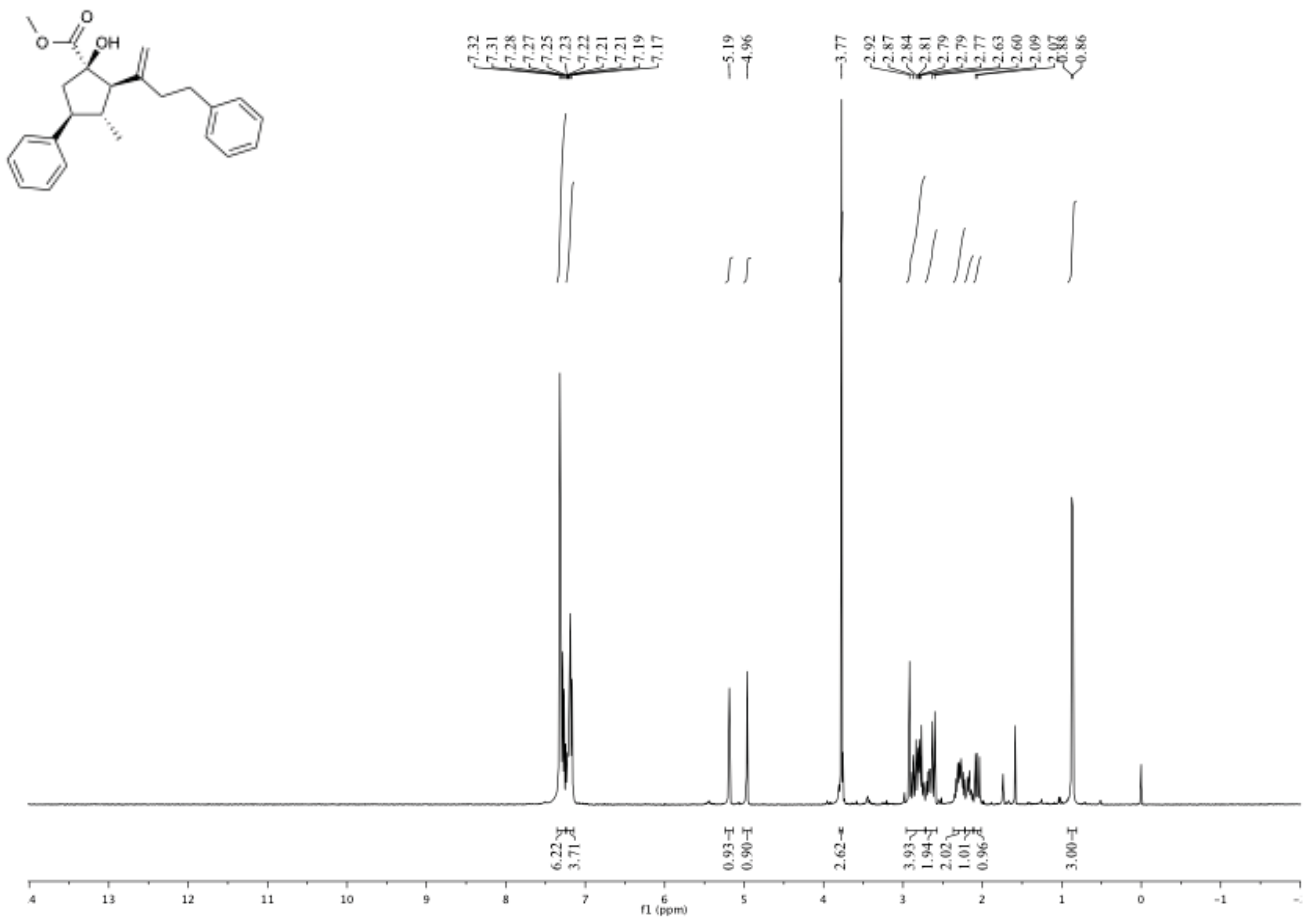

Supplementary Figure 29. <sup>1</sup>H NMR Spectrum of 24c

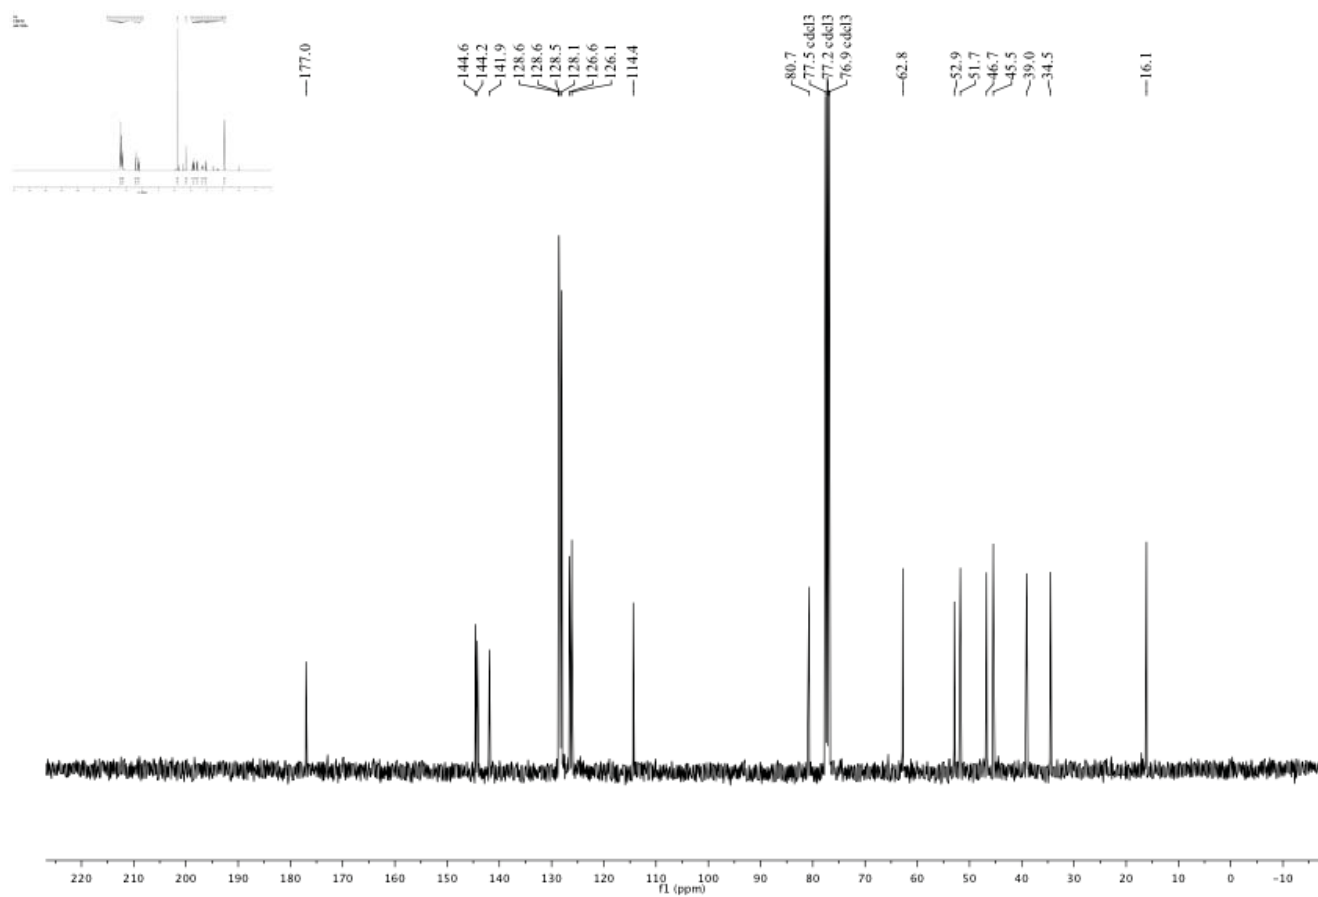

Supplementary Figure 30. <sup>13</sup>C NMR Spectrum of 24c

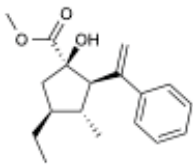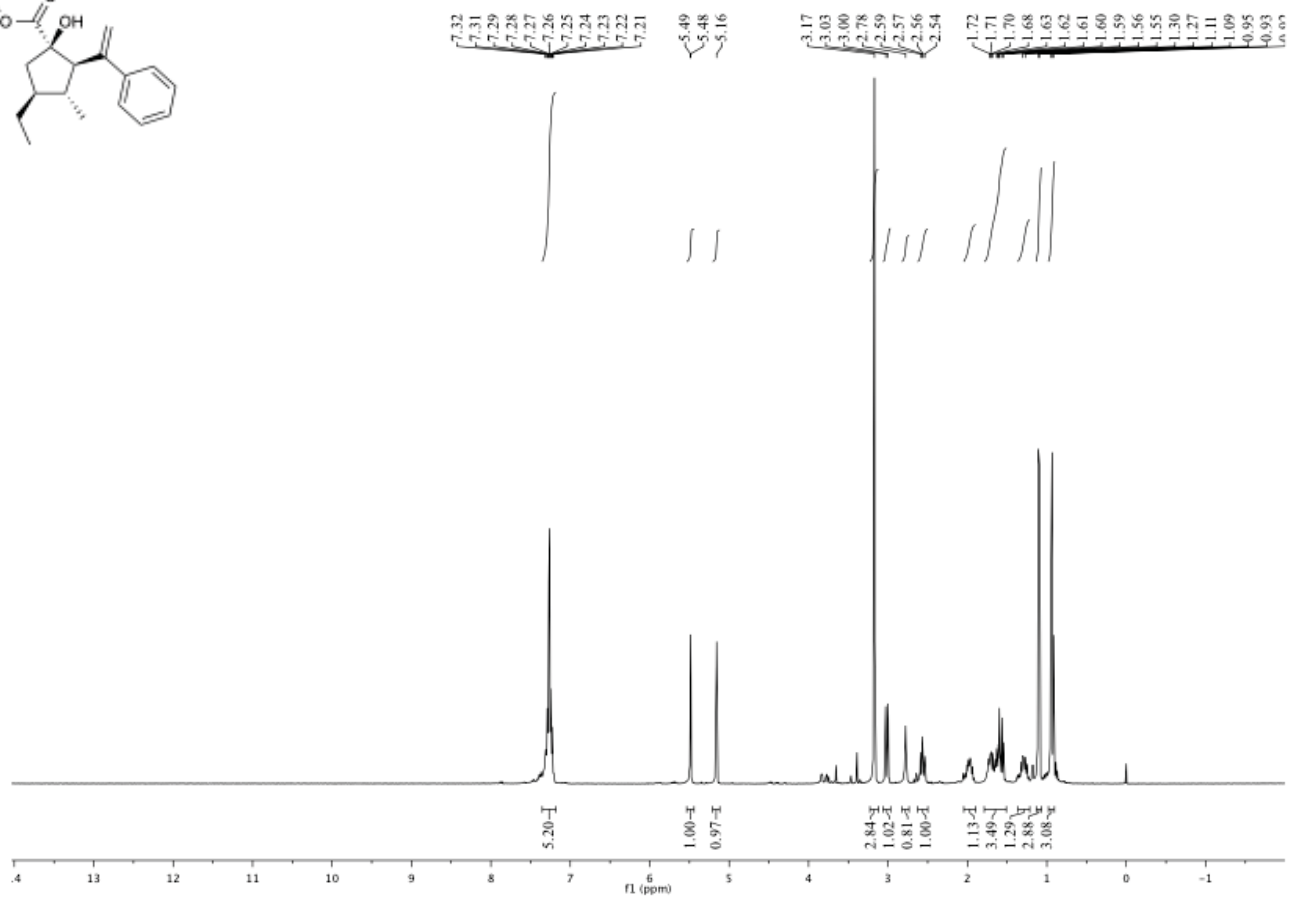

Supplementary Figure 31. <sup>1</sup>H NMR Spectrum of 24d



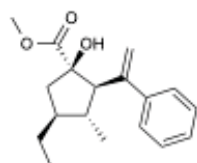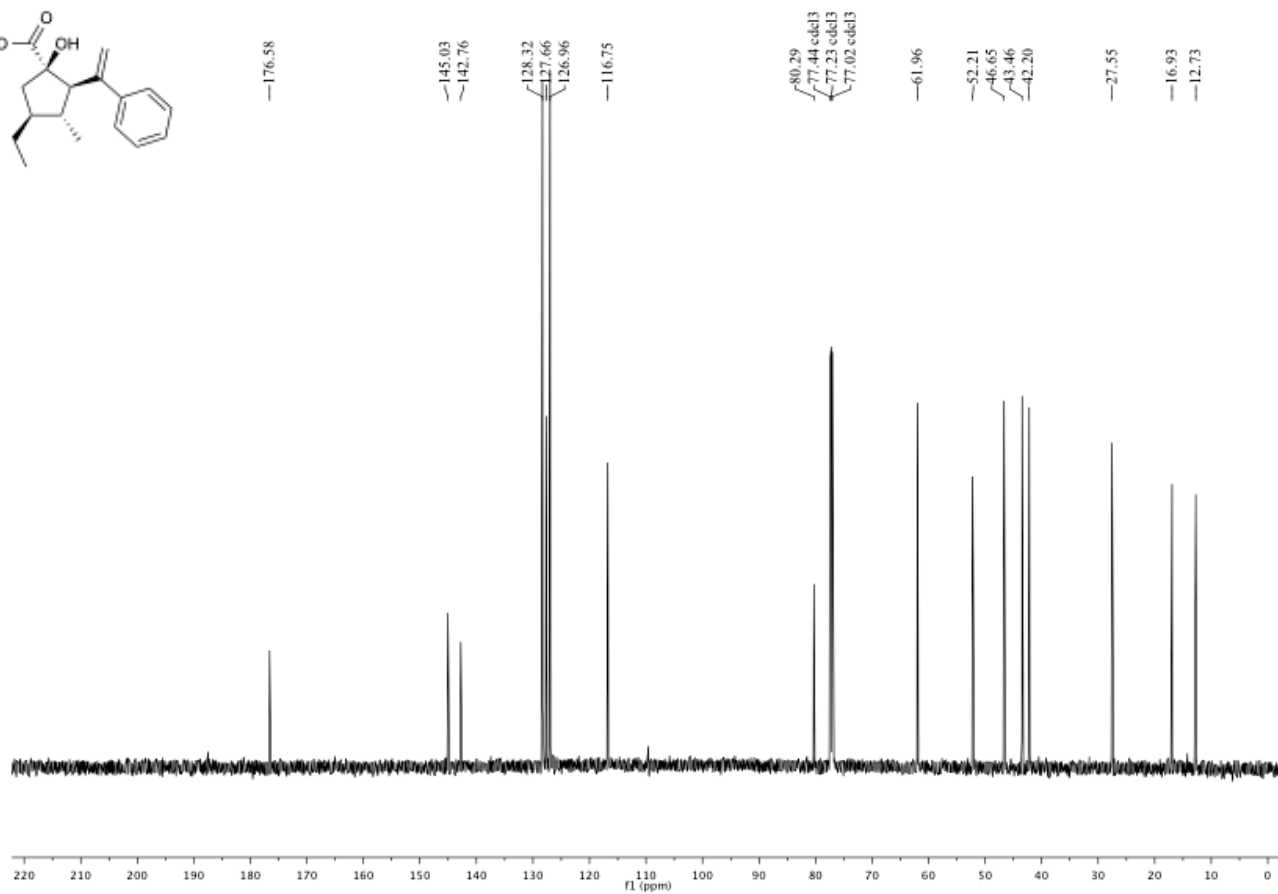

Supplementary Figure 32.  $^{13}\text{C}$  NMR Spectrum of 24d

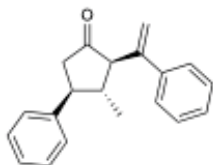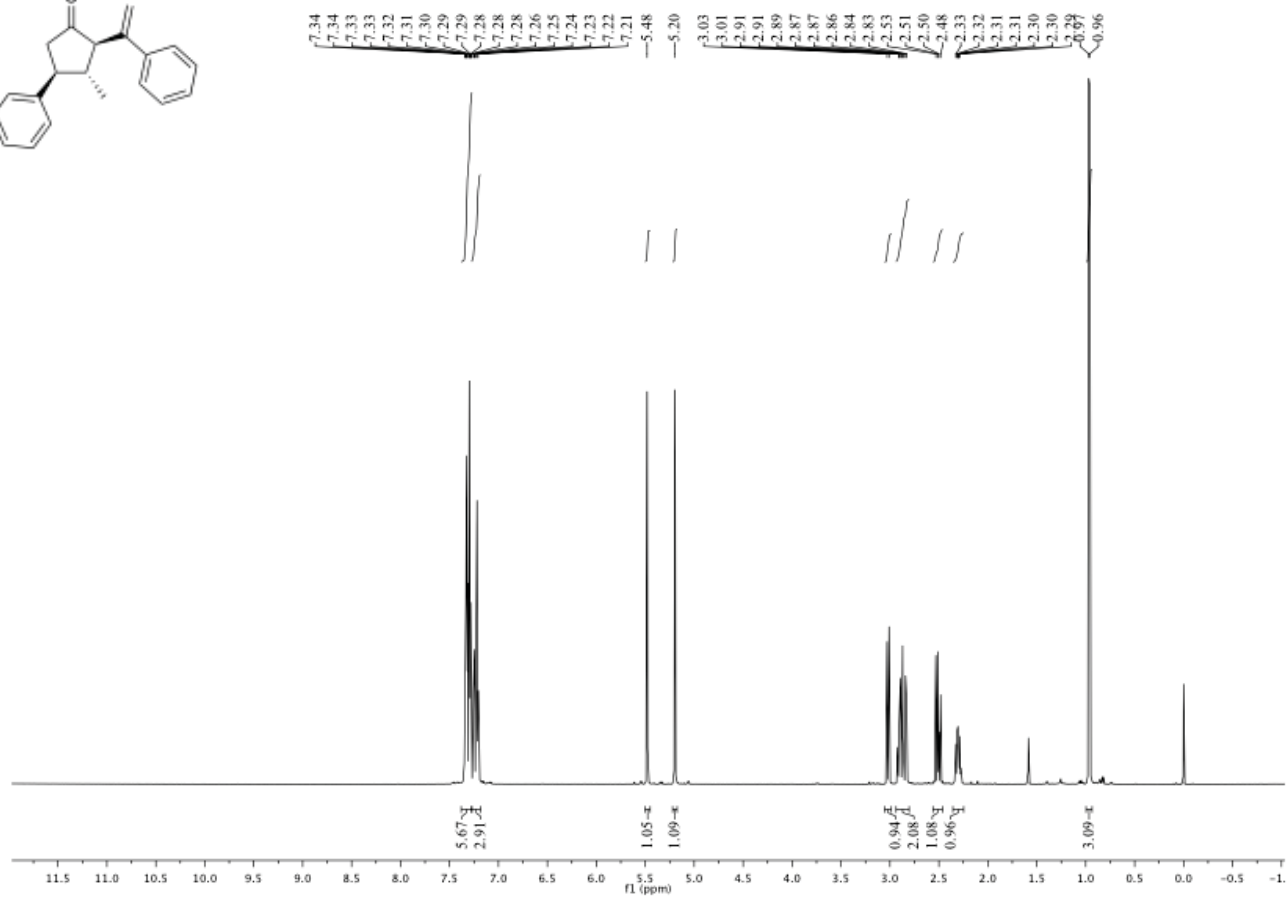

Supplementary Figure 33. <sup>1</sup>H NMR Spectrum of 25

Pulse Sequence: s2pul  
 ure  
 00 sec  
 65 sec  
 6  
 5391418 MHz  
 8390524 MHz  
 continuously on  
 WALTZ-16 modulated  
 DATA PROCESSING  
 Line broadening 2.0 Hz  
 FT size 65536  
 Total time 38 hr, 14 min, 33 sec

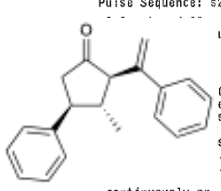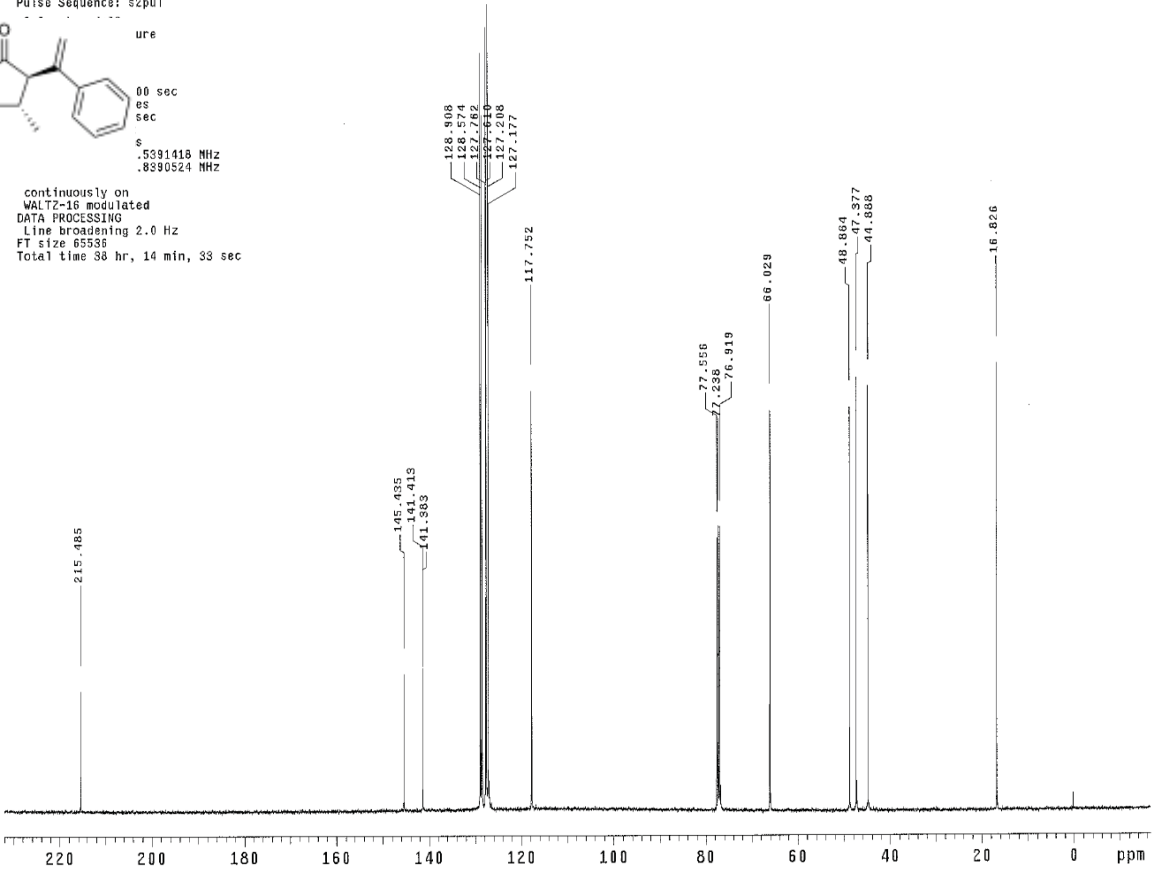

Supplementary Figure 34. <sup>13</sup>C NMR Spectrum of 25

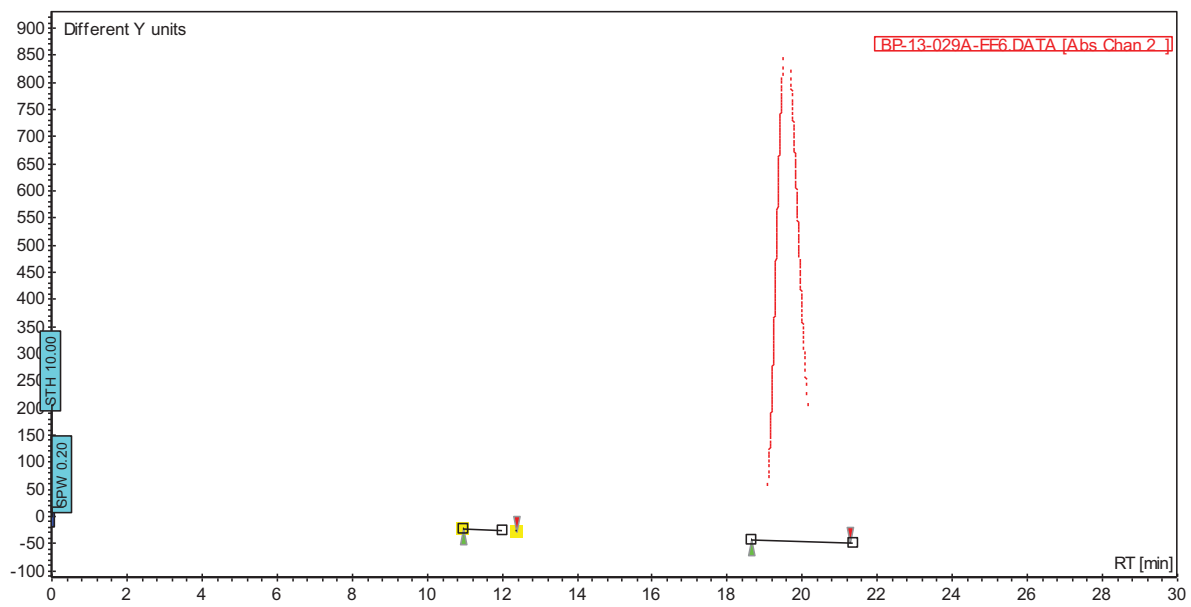

(a)

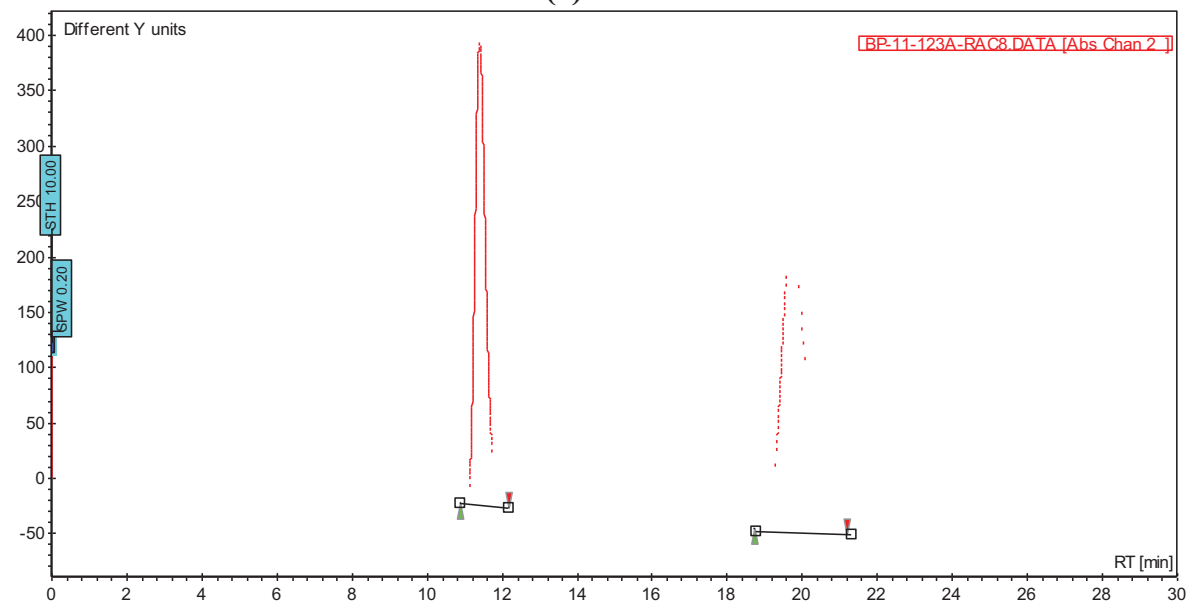

(b)

Supplementary Figure 35. (a) Enantioenriched and (b) Racemic HPLC Traces for 15

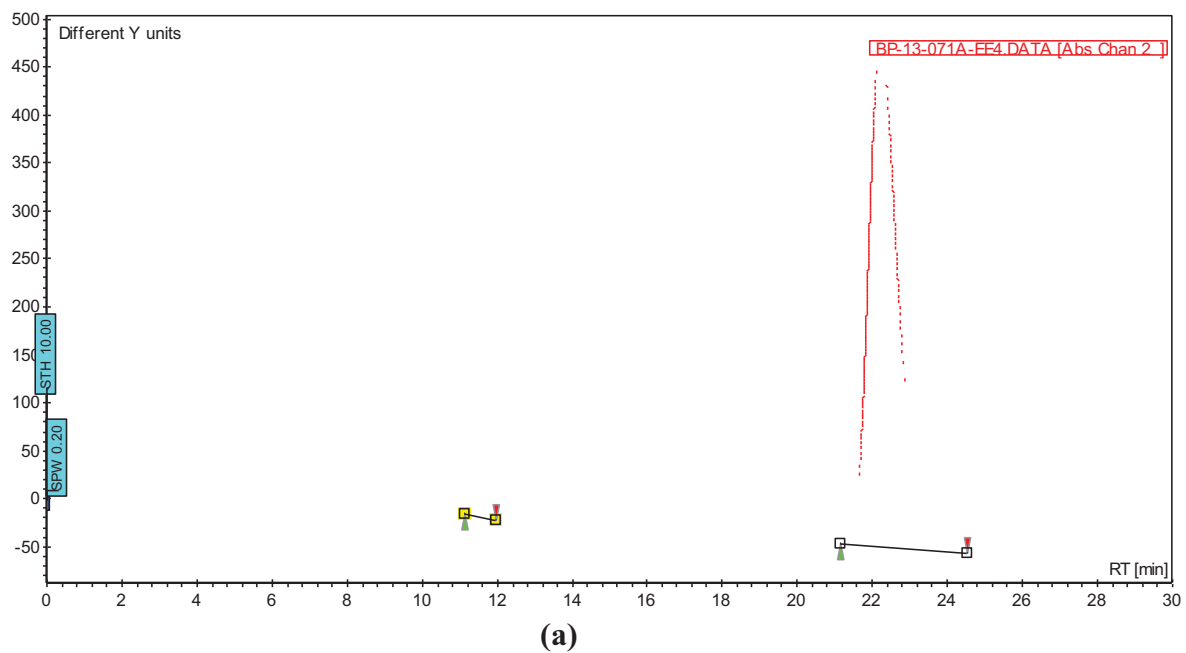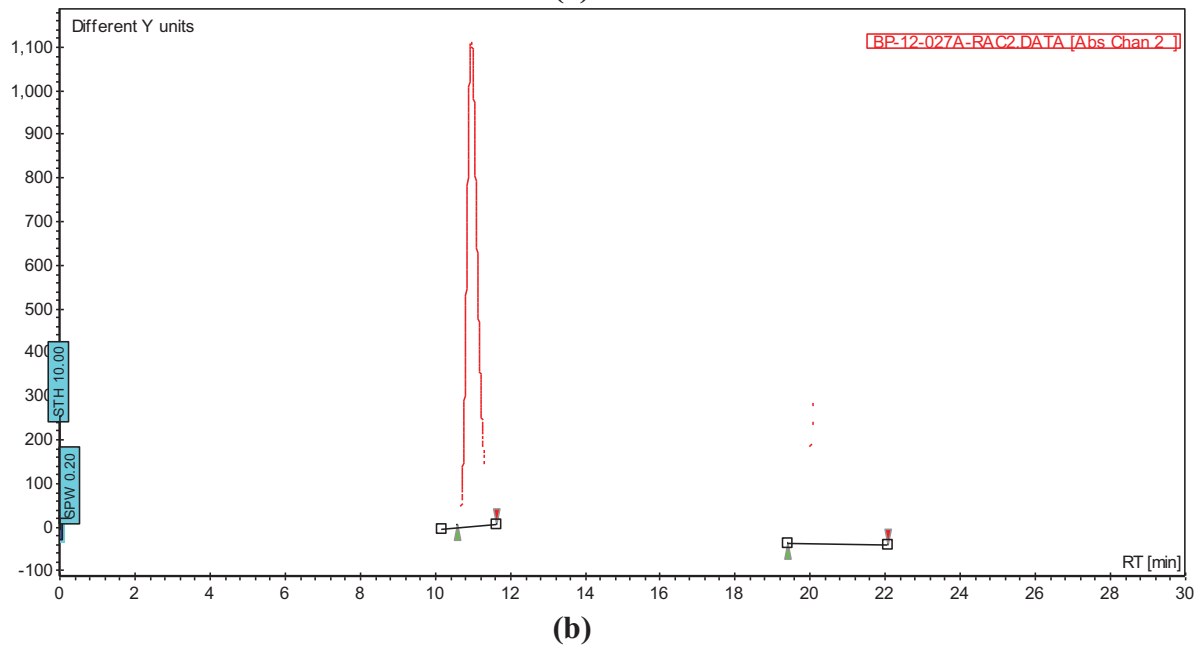

Supplementary Figure 36. (a) Enantioenriched and (b) Racemic HPLC Traces for 18a

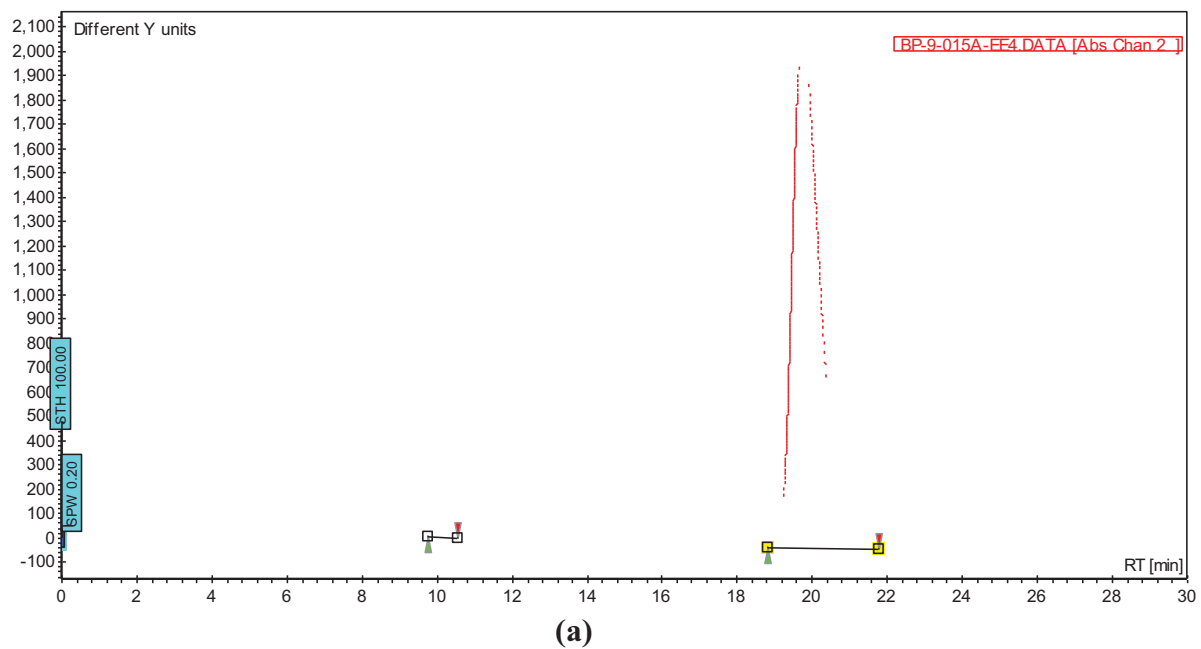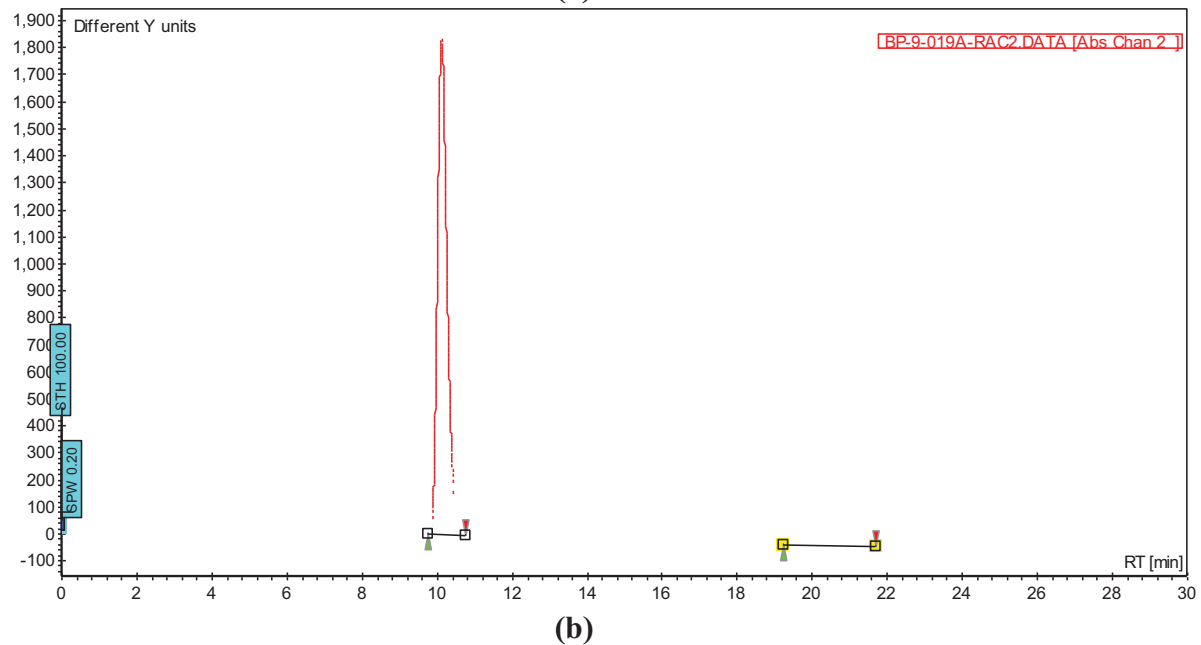

Supplementary Figure 37. (a) Enantioenriched and (b) Racemic HPLC Traces for 18b

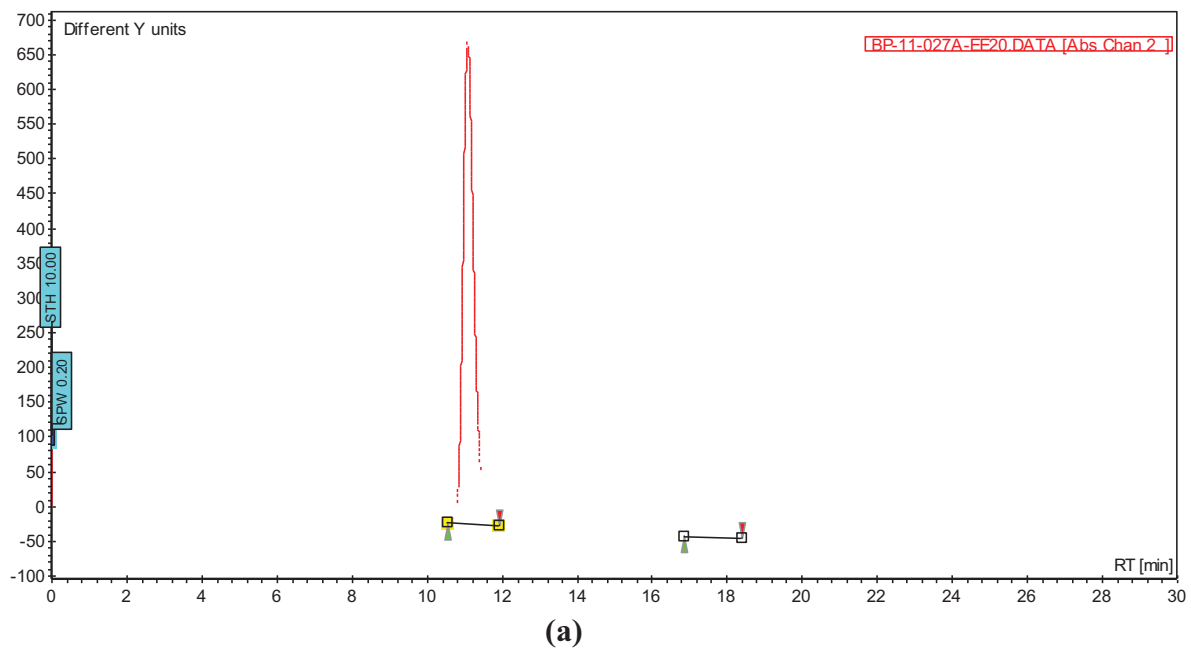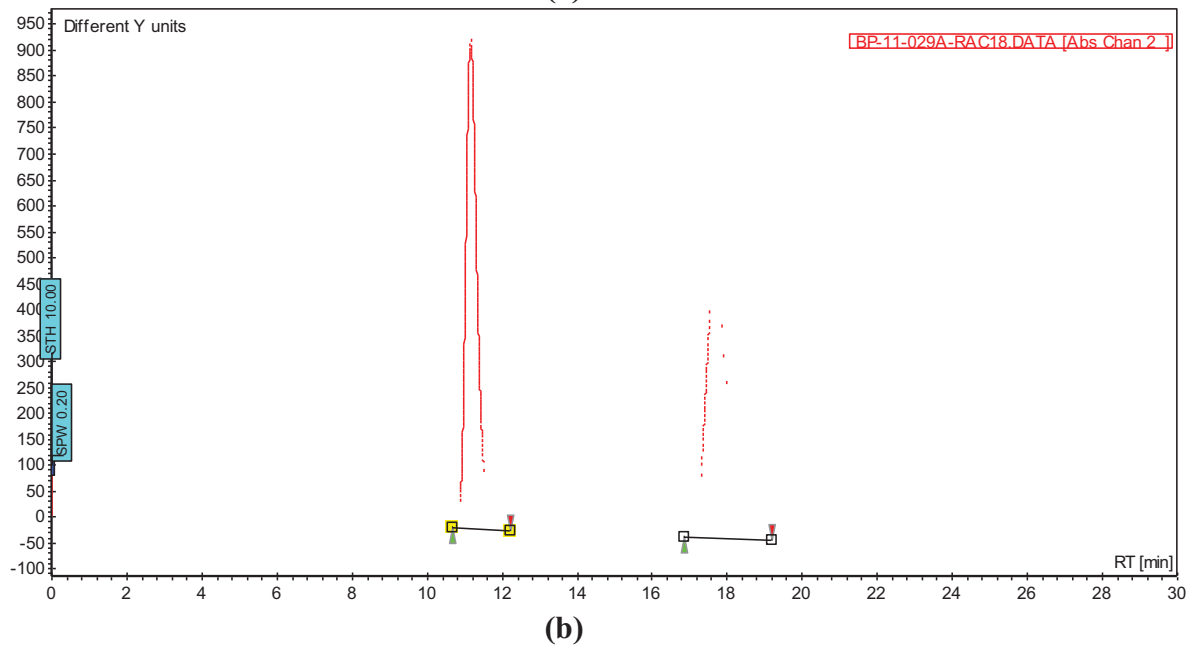

Supplementary Figure 38. (a) Enantioenriched and (b) Racemic HPLC Traces for 18c

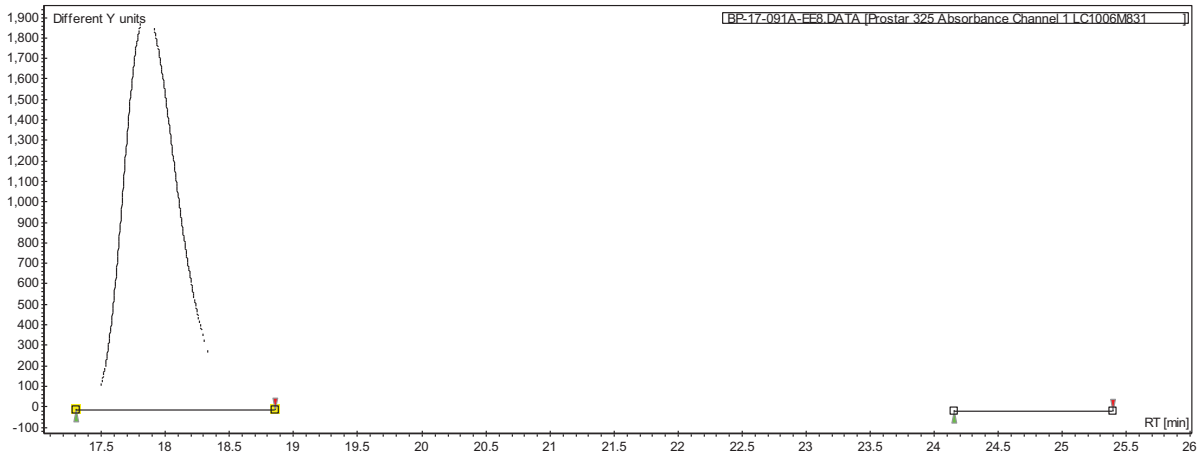

(a)

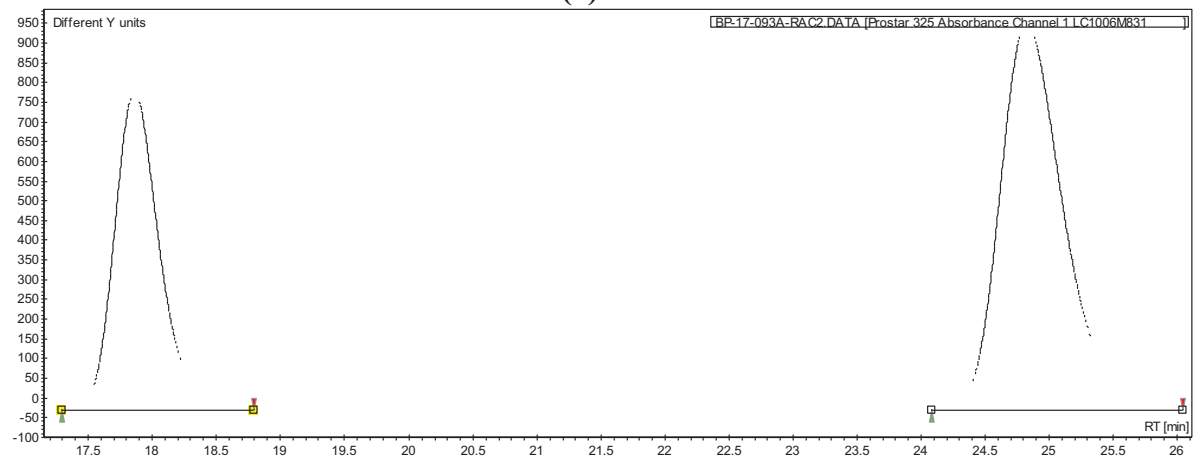

(b)

Supplementary Figure 39. (a) Enantioenriched and (b) Racemic HPLC Traces for 18d



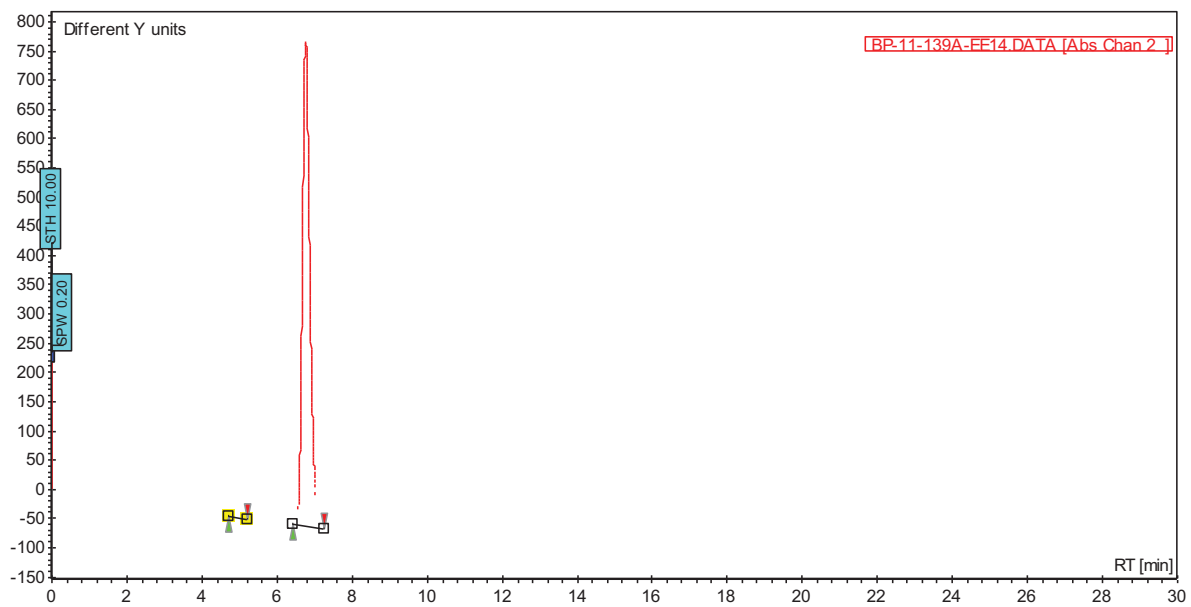

(a)

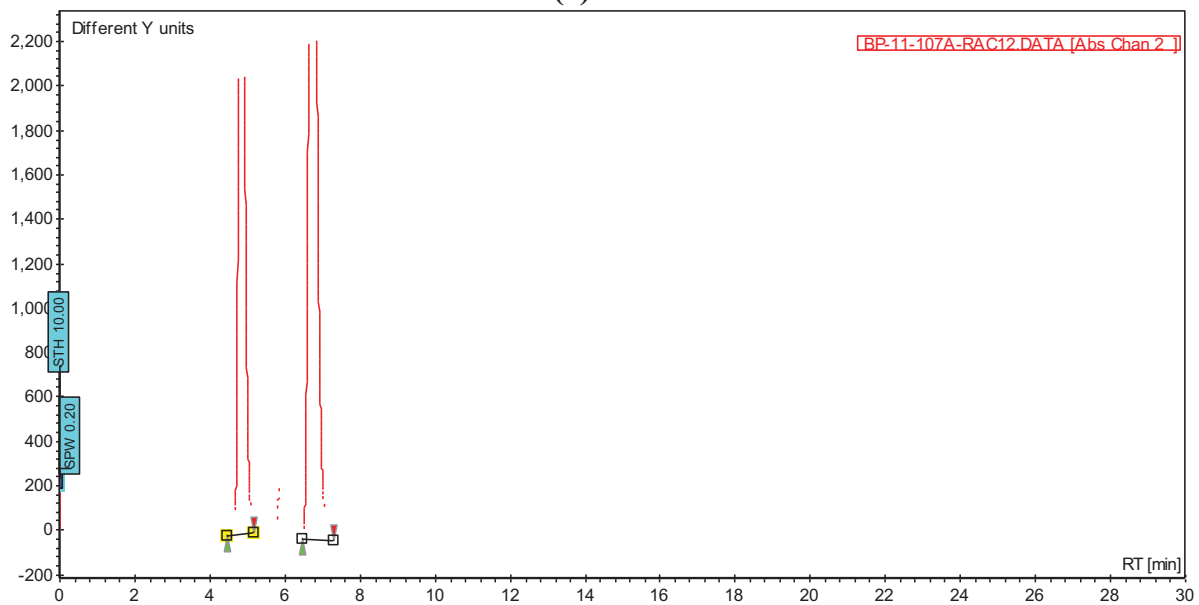

(b)

Supplementary Figure 40. (a) Enantioenriched and (b) Racemic HPLC Traces for 20a

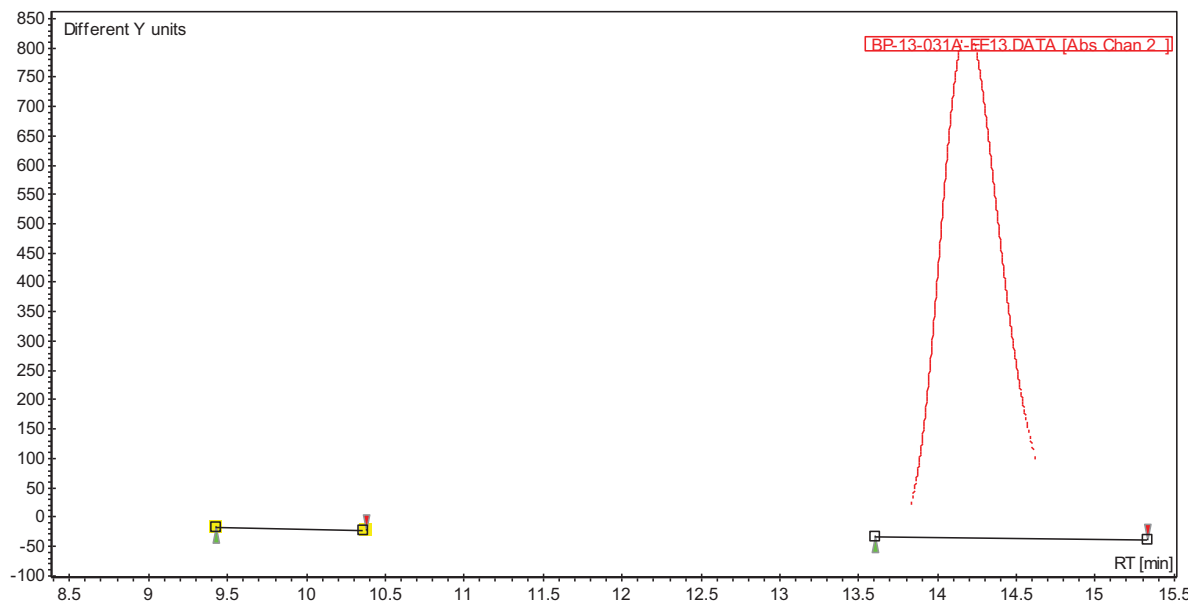

(a)

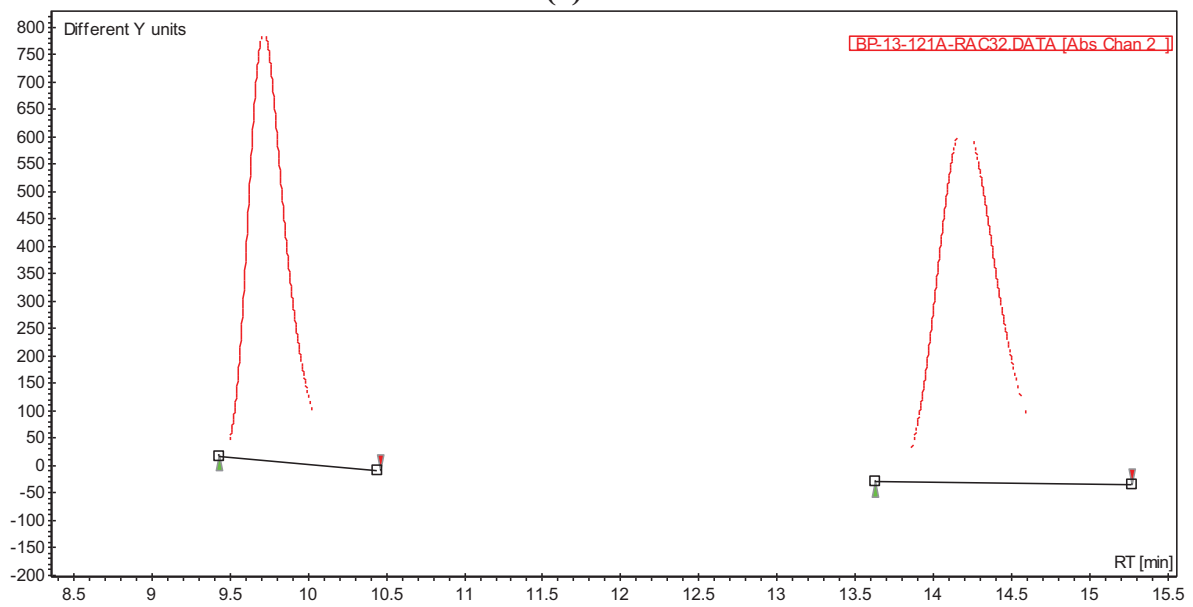

(b)

Supplementary Figure 41. (a) Enantioenriched and (b) Racemic HPLC Traces for 20b

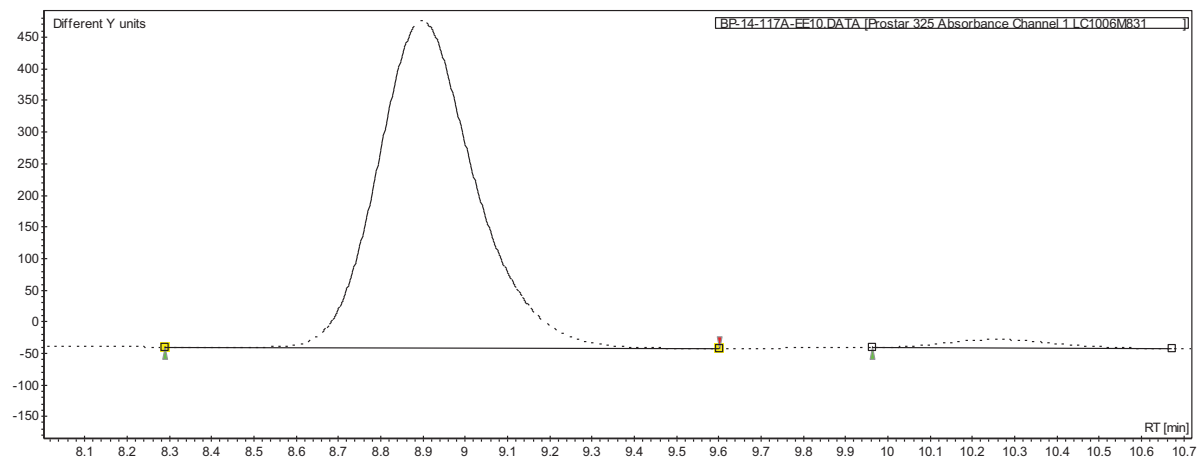

(a)

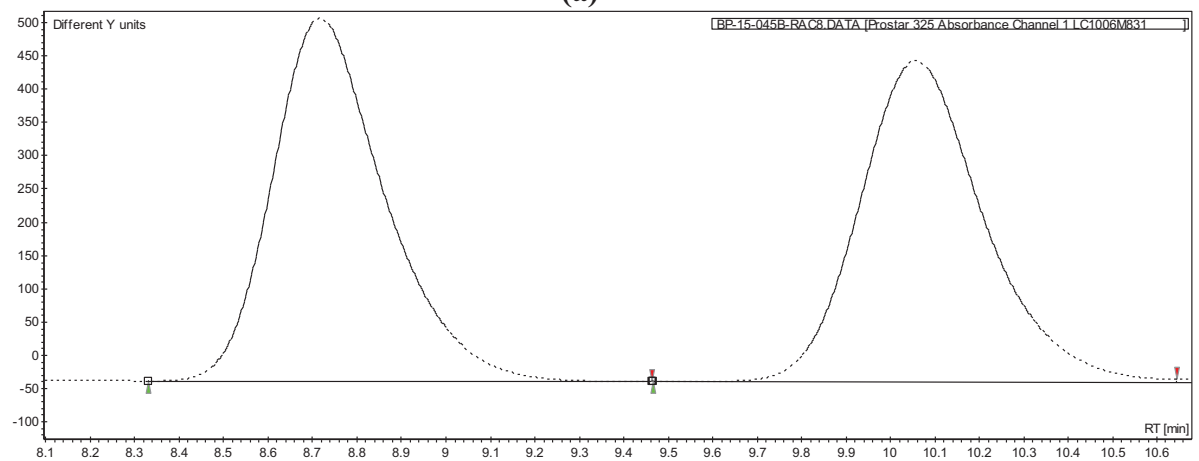

(b)

Supplementary Figure 42. (a) Enantioenriched and (b) Racemic HPLC Traces for 20c

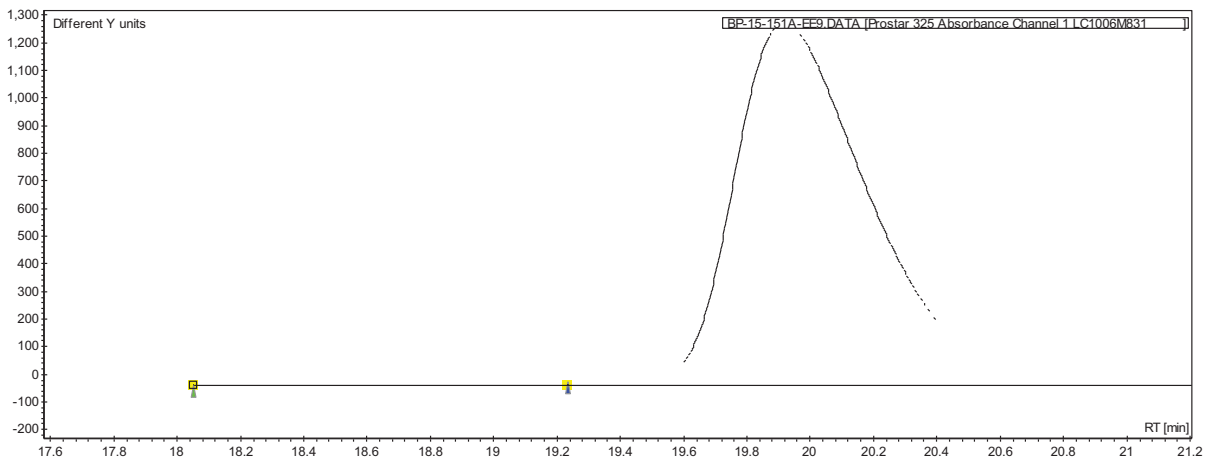

(a)

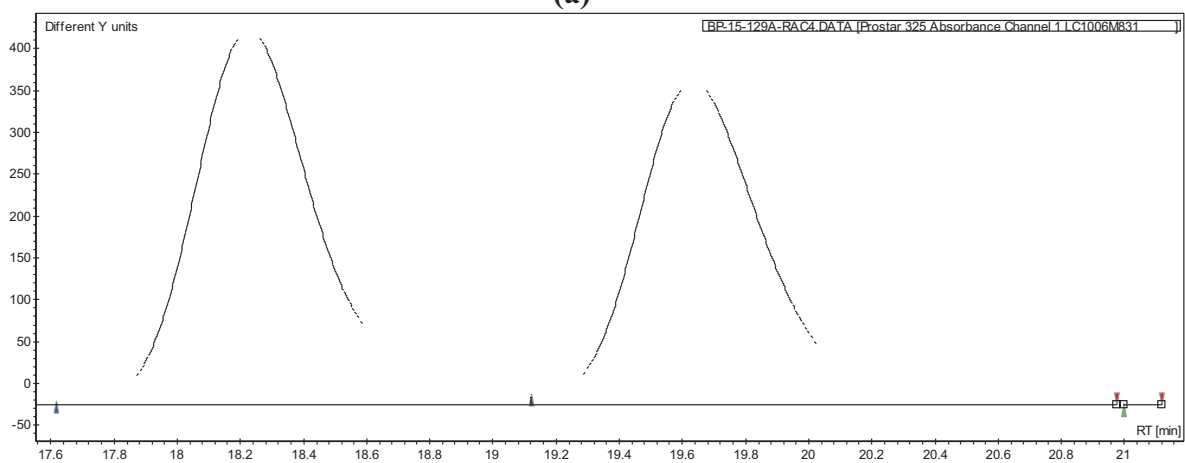

(b)

Supplementary Figure 43. (a) Enantioenriched and (b) Racemic HPLC Traces for 20d

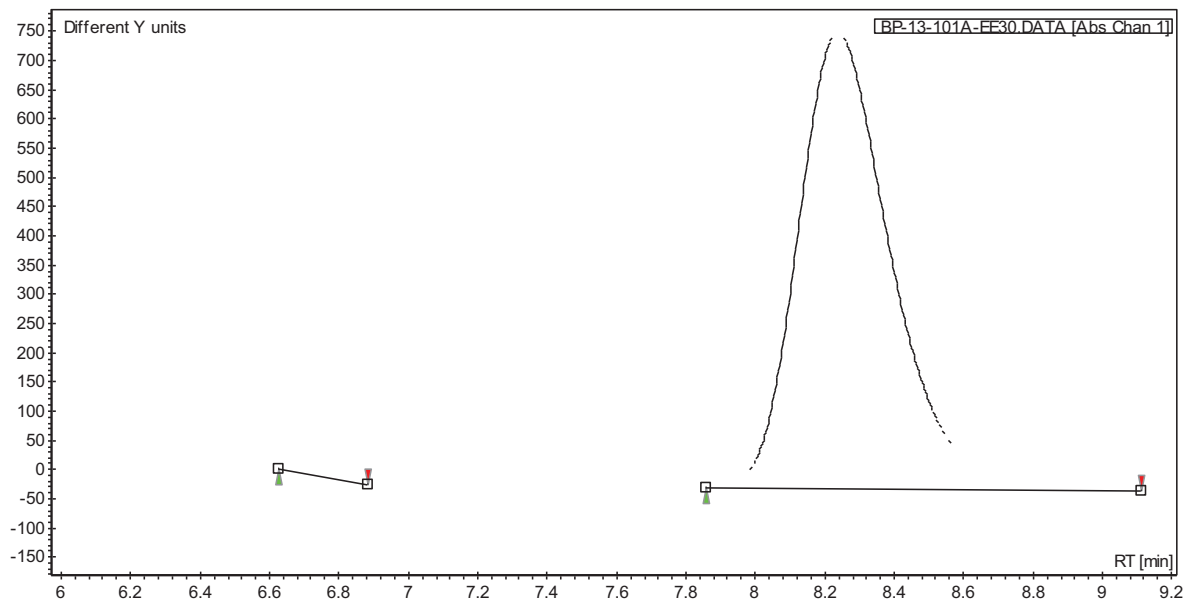

(a)

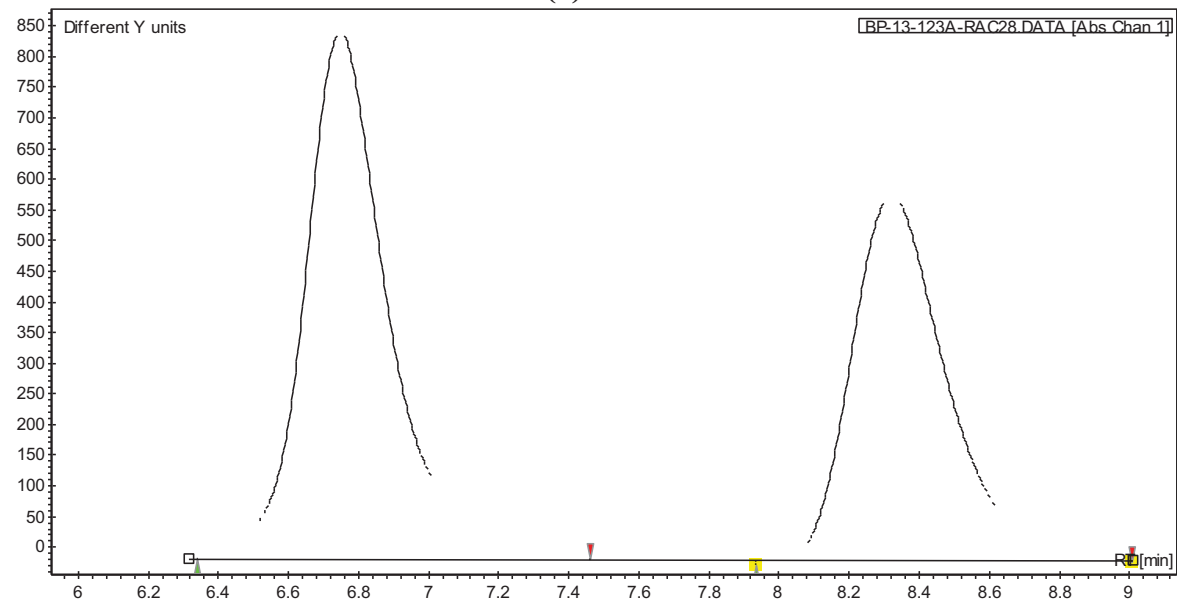

(b)

Supplementary Figure 44. (a) Enantioenriched and (b) Racemic HPLC Traces for 24a

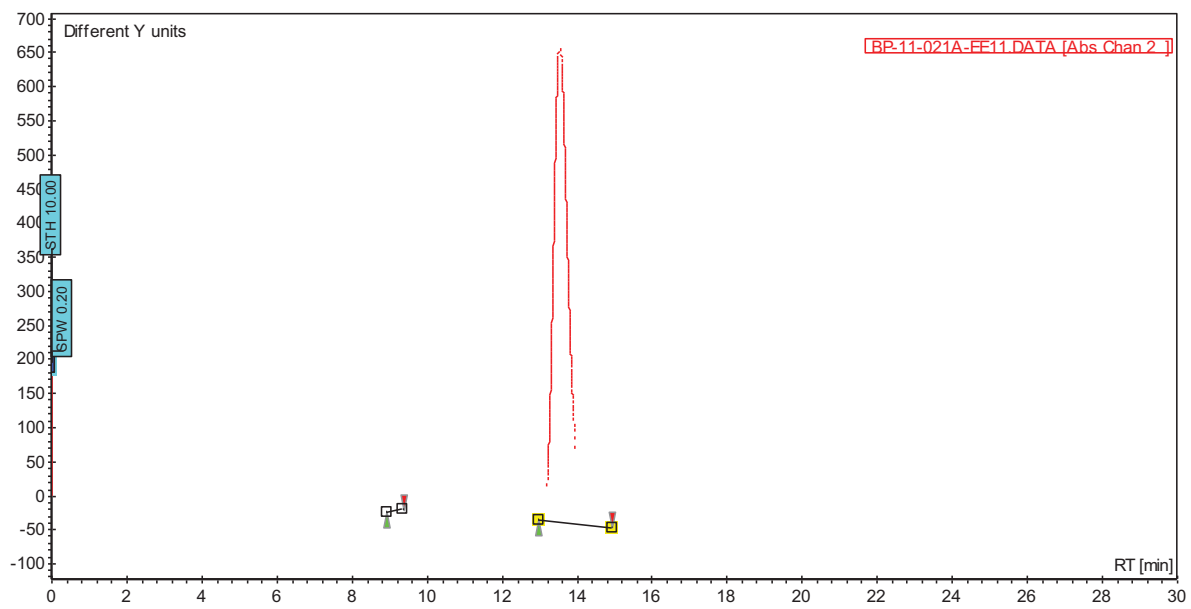

(a)

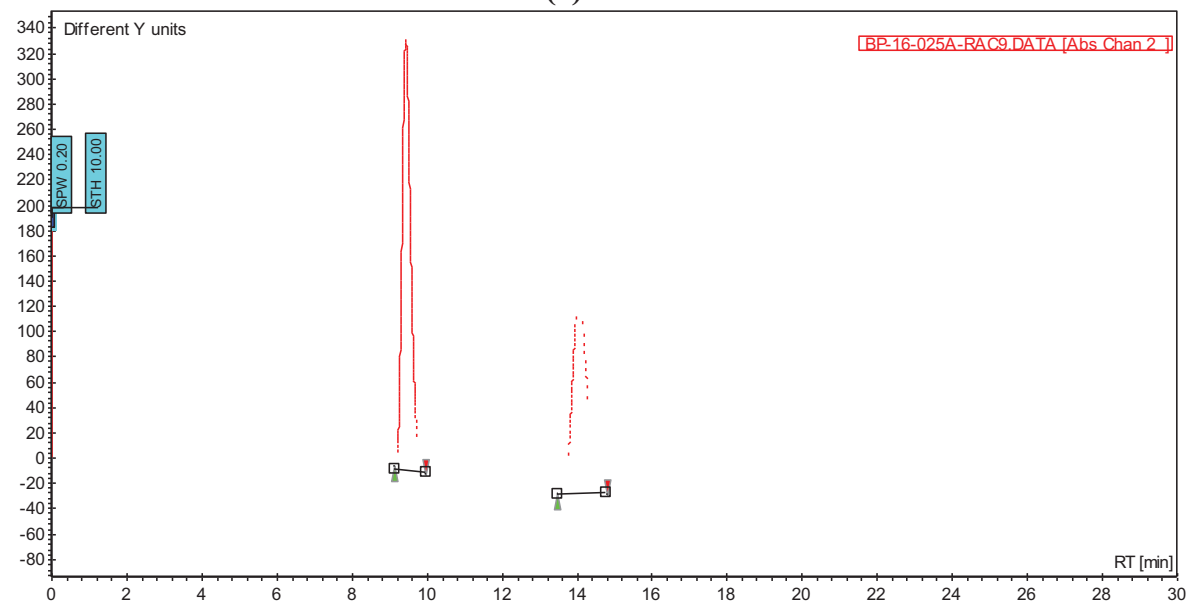

(b)

Supplementary Figure 45. (a) Enantioenriched and (b) Racemic HPLC Traces for 24b

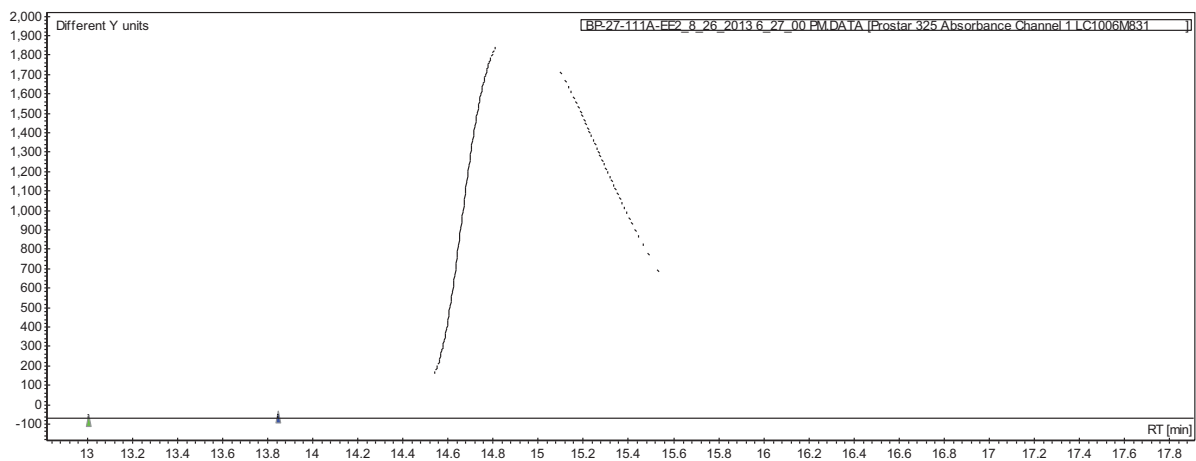

(a)

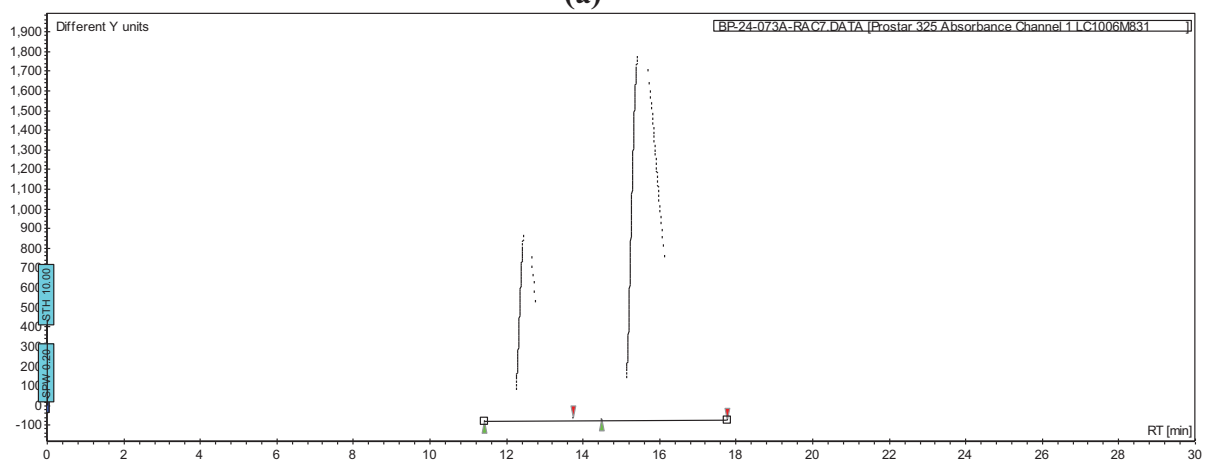

(b)

Supplementary Figure 46. (a) Enantioenriched and (b) Racemic HPLC Traces for 24c

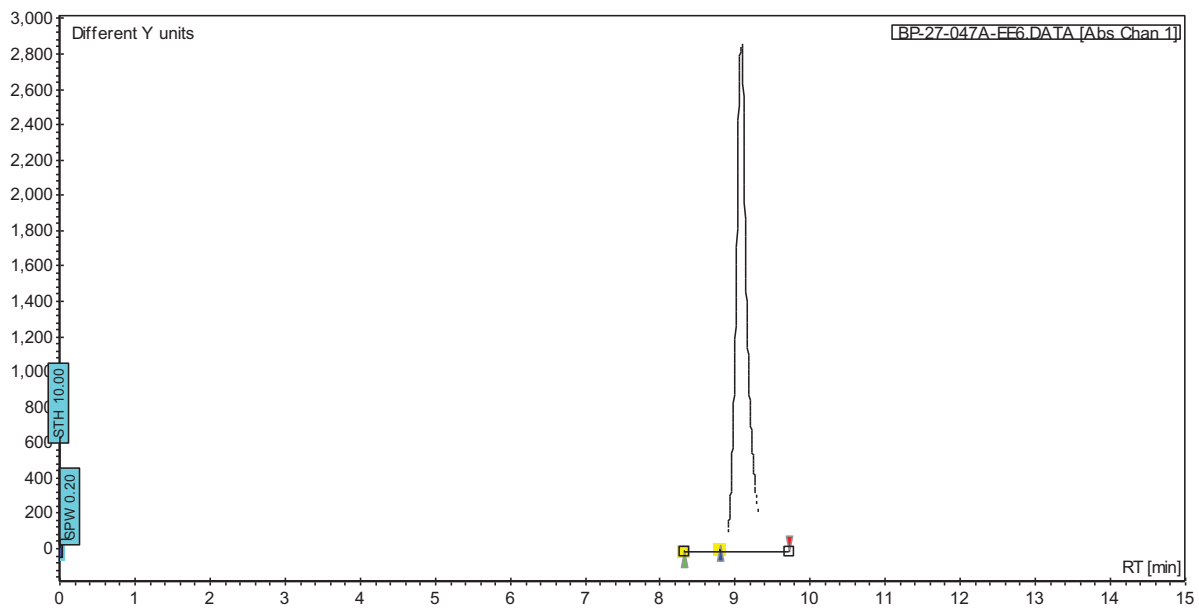

(a)

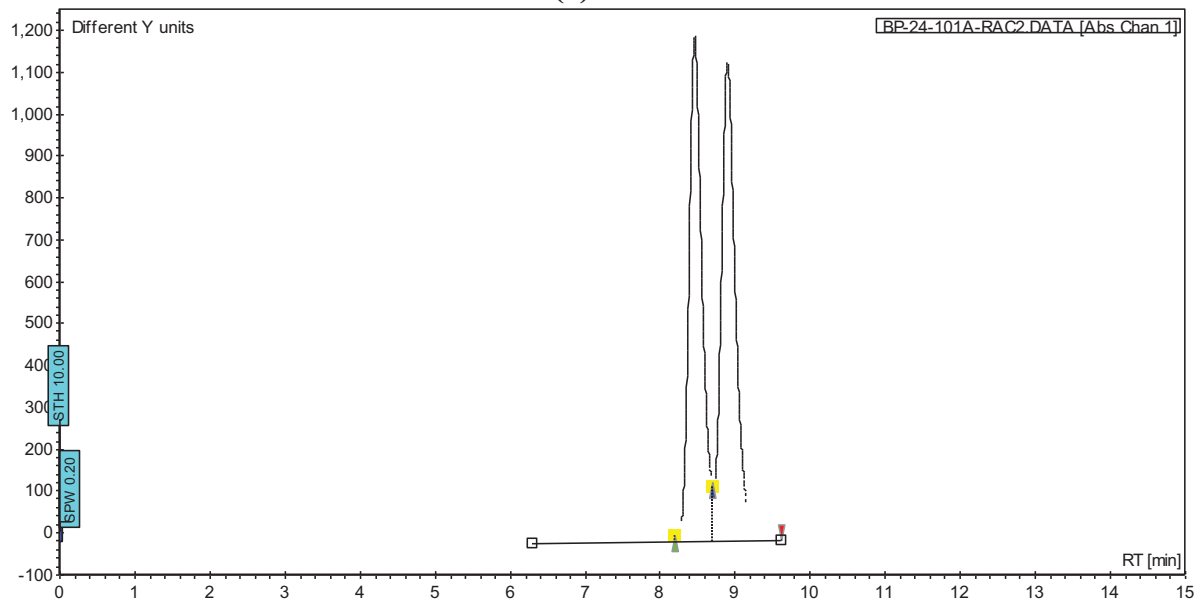

(b)

Supplementary Figure 47. (a) Enantioenriched and (b) Racemic HPLC Traces for 24d



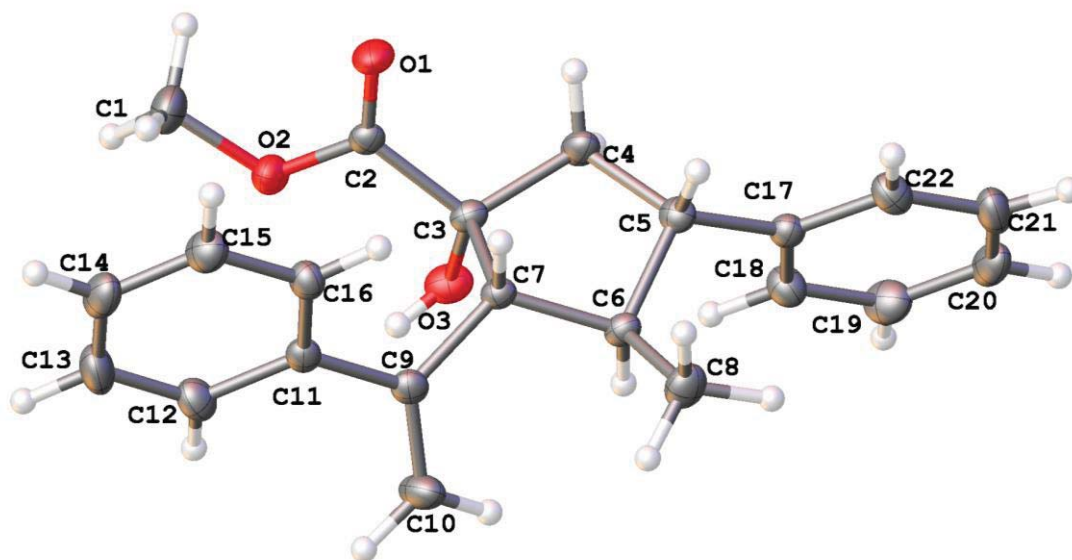

Supplementary Figure 48. ORTEP Diagram of 24a

## Supplementary Tables

**Supplementary Table 1. Effect of calcium chloride on the catalyst loading for the cyclopentane synthesis**

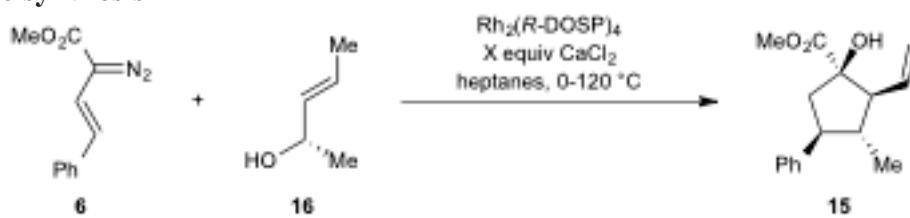

| entry | $\text{Rh}_2(\text{R-DOSP})_4$ | $\text{CaCl}_2$ , equiv | yield, % <sup>a</sup> | dr <sup>b</sup> | ee, % <sup>c</sup> |
|-------|--------------------------------|-------------------------|-----------------------|-----------------|--------------------|
| 1     | 0.1 mol %                      | -                       | 45                    | 88 : 12         | 86                 |
| 2     | 0.5 mol %                      | 2.0                     | 68                    | 88 : 12         | 91                 |
| 3     | 0.1 mol %                      | 2.0                     | 66                    | 89 : 11         | 92                 |
| 4     | 0.01 mol %                     | 2.0                     | 51                    | 87 : 13         | 90                 |
| 5     | 0.001 mol %                    | 2.0                     | 8                     | 87 : 13         | 90                 |

<sup>a</sup> Isolated yields. <sup>b</sup> Determined by  $^1\text{H}$  NMR of the crude residue. <sup>c</sup> Determined by HPLC on a chiral stationary phase.

## Supplementary Methods

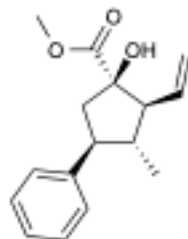

### (-)-(1R,2S,3R,4S)-methyl 1-hydroxy-3-methyl-4-phenyl-2-vinylcyclopentanecarboxylate

#### (15)

Prepared by *General Procedure 1.2.1* with **6** (121 mg, 0.60 mmol, 1.2 equiv), **16** (43 mg, 0.50 mmol, 1.0 equiv), Rh<sub>2</sub>(*R*-DOSP)<sub>4</sub> (0.9 mg, 0.0005 mmol, 0.1 mol %), and CaCl<sub>2</sub> (111 mg, 1.0 mmol, 2.0 equiv), heating to 125 °C for 40 h. Purification by flash chromatography (SiO<sub>2</sub>, pentane/Et<sub>2</sub>O, 10:1) afforded the title compound as a colorless oil (85 mg, 66% yield). A minor component eluted second off the column, which <sup>1</sup>H NMR analysis indicated to contain a mixture of **15** and *epi*-**15**. Preparative HPLC of the mixture (hexanes/*i*-propanol, 99:1) afforded a small quantity of pure *epi*-**15**.

[ $\alpha$ ]<sub>D</sub><sup>20</sup> -7.2° (*c* 1.65, CHCl<sub>3</sub>); <sup>1</sup>H NMR (400 MHz, CDCl<sub>3</sub>):  $\delta$  7.29-7.33 (m, 4H), 7.19-7.23 (m, 1H), 5.79 (ddd, *J* = 17.2, 10.2, 8.8 Hz, 1H), 5.19 (dd, *J* = 10.2, 2.0 Hz, 1H), 5.07 (m, 1H), 3.81 (s, 1H), 3.17 (s, 1H), 2.72-2.86 (m, 2H), 2.43 (dd, *J* = 11.8, 8.8 Hz, 1H), 2.12-2.23 (m, 1H), 2.01 (dd, *J* = 13.6, 7.2 Hz, 1H), 0.87 (d, *J* = 6.4 Hz, 3H); <sup>13</sup>C NMR (100 MHz, CDCl<sub>3</sub>):  $\delta$  176.9, 144.4, 134.8, 128.7, 128.0, 126.5, 119.1, 82.7, 62.0, 53.1, 52.5, 46.8, 46.5, 16.1; IR (neat): 3521, 3075, 3027, 2953, 2923, 2868, 1728, 1638, 1602, 1494, 1455, 1437 cm<sup>-1</sup>; HRMS (*m/z*): [M+H]<sup>+</sup> calc for C<sub>16</sub>H<sub>20</sub>NaO<sub>3</sub>, 283.1305; found, 283.1305; HPLC: 91% ee, CHIRALCEL ODR, 0.5% isopropanol/hexanes, 0.5 mL/min, UV: 210 nm, *t*<sub>R</sub>: 11.4 min (minor), 19.6 min (major); <sup>1</sup>H NMR (*epi*-**15**) (600 MHz, CDCl<sub>3</sub>):  $\delta$  7.34-7.28 (m, 4H), 7.24-7.20 (m, 1H), 5.94 (dt, *J* = 16.8, 10.8 Hz, 1H), 5.16 (dd, *J* = 16.2, 2.1 Hz, 1H), 5.04 (dd, *J* = 17.4, 2.1 Hz, 1H), 3.82 (s, 3H), 3.16-3.07 (m,

3H), 2.42-2.33 (m, 2H), 2.19 (dd,  $J = 13.0, 7.0$  Hz, 1H), 0.98 (d,  $J = 7.1$  Hz, 3H);  $^{13}\text{C}$  NMR (*epi-15*) (100 MHz,  $\text{CDCl}_3$ ):  $\delta$  176.5, 144.2, 134.4, 128.7, 127.7, 126.6, 118.6, 84.1, 56.8, 53.1, 52.7, 46.6, 45.0, 16.8.

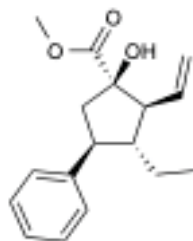

**(-)-(1*R*,2*S*,3*R*,4*S*)-methyl 3-ethyl-1-hydroxy-4-phenyl-2-vinylcyclopentanecarboxylate (**18a**)**

Prepared by *General Procedure 1.2.1* with **6** (121 mg, 0.60 mmol, 1.2 equiv), **17a** (50 mg, 0.50 mmol, 1.0 equiv),  $\text{Rh}_2(\text{R-DOSP})_4$  (0.9 mg, 0.0005 mmol, 0.1 mol %), and  $\text{CaCl}_2$  (111 mg, 1.0 mmol, 2.0 equiv), heating to 125 °C for 40 h. Purification by flash chromatography ( $\text{SiO}_2$ , pentane/ $\text{Et}_2\text{O}$ , 12:1) afforded the title compound as a colorless oil (91 mg, 66% yield).

$[\alpha]_D^{20} -17.1^\circ$  ( $c$  2.15,  $\text{CHCl}_3$ );  $^1\text{H}$  NMR (400 MHz,  $\text{CDCl}_3$ ):  $\delta$  7.28-7.36 (m, 4H), 7.17-7.21 (m, 1H), 5.82 (ddd,  $J = 18.4, 10.0, 8.8$  Hz, 1H), 5.16 (dd,  $J = 10.0, 1.6$  Hz, 1H), 5.06 (dd,  $J = 18.4, 1.6$  Hz, 1H), 3.81 (s, 3H), 3.17 (s, 1H), 2.94 (ddd,  $J = 10.0, 7.2, 7.2$  Hz, 1H), 2.81 (dd,  $J = 14.4, 10.8$  Hz, 1H), 2.59 (dd,  $J = 11.8, 9.0$  Hz, 1H), 2.20-2.28 (m, 1H), 1.95 (dd,  $J = 14.4, 7.4$  Hz, 1H), 1.33-1.45 (m, 2H), 0.73 (t,  $J = 7.6$  Hz, 3H);  $^{13}\text{C}$  NMR (100 MHz,  $\text{CDCl}_3$ ):  $\delta$  176.7, 145.4, 135.7, 128.6, 128.2, 126.4, 118.7, 83.1, 59.5, 53.0, 52.1, 49.4, 47.1, 23.6, 10.9; IR (neat): 3520, 3027, 2956, 2918, 2877, 1728, 1638, 1602, 1494, 1456, 1437  $\text{cm}^{-1}$ ; HRMS ( $m/z$ ):  $[\text{M}+\text{Na}]^+$  calcd for  $\text{C}_{17}\text{H}_{23}\text{NaO}_3$ , 2971.1461; found, 297.1462; HPLC: 93% ee, CHIRALCEL ODR, 0.5% isopropanol/hexanes, 0.5 mL/min, UV: 210 nm,  $t_R$ : 11.5 min (minor), 22.2 min (major).

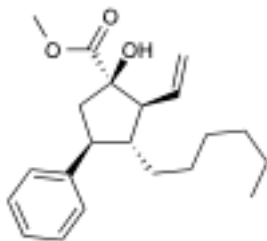

**(-)-(1*R*,2*S*,3*R*,4*S*)-methyl 3-hexyl-1-hydroxy-4-phenyl-2-vinylcyclopentanecarboxylate  
(18b)**

Prepared by *General Procedure 1.2.1* with **6** (121 mg, 0.60 mmol, 1.2 equiv), **17b** (78 mg, 0.50 mmol, 1.0 equiv), Rh<sub>2</sub>(*R*-DOSP)<sub>4</sub> (0.9 mg, 0.0005 mmol, 0.1 mol %), and CaCl<sub>2</sub> (111 mg, 1.0 mmol, 2.0 equiv), heating to 125 °C for 28 h. Purification by flash chromatography (SiO<sub>2</sub>, pentane/Et<sub>2</sub>O, 15:1) afforded the title compound as a colorless oil (118 mg, 71% yield).

[ $\alpha$ ]<sub>D</sub><sup>20</sup> -1.4° (*c* 1.72, CHCl<sub>3</sub>); <sup>1</sup>H NMR (600 MHz, CDCl<sub>3</sub>):  $\delta$  7.33 (d, *J* = 7.6 Hz, 2H), 7.29 (t, *J* = 7.6 Hz, 2H), 7.19 (t, *J* = 7.6 Hz, 1H), 5.82 (ddd, *J* = 17.4, 10.3, 9.0 Hz, 1H), 5.16 (dd, *J* = 10.3, 1.9 Hz, 1H), 5.06 (dd, *J* = 17.4, 1.9 Hz, 1H), 3.80 (s, 3H), 3.16 (s, 1H), 2.92 (dt, *J* = 10.2, 7.2 Hz, 1H), 2.81 (dd, *J* = 14.4, 10.2 Hz, 1H), 2.56 (dd, *J* = 12.0, 9.0 Hz, 1H), 2.27 (dtd, *J* = 11.4, 11.4, 5.4 Hz, 1H), 1.94 (dd, *J* = 14.4, 7.2 Hz, 1H), 1.28-1.39 (m, 2H), 1.05-1.19 (m, 8H), 0.80 (t, *J* = 7.2 Hz, 3H); <sup>13</sup>C NMR (100 MHz, CDCl<sub>3</sub>):  $\delta$  176.5, 145.3, 135.5, 128.4, 128.0, 126.1, 118.5, 83.0, 60.1, 52.8, 50.6, 50.1, 47.0, 31.6, 31.4, 29.5, 26.3, 22.5, 14.0; IR (neat): 3525, 3063, 3027, 2953, 2925, 2855, 1730, 1638, 1602, 1494, 1456, 1437 cm<sup>-1</sup>; HRMS (*m/z*): [M-OH]<sup>+</sup> calcd for C<sub>21</sub>H<sub>29</sub>O<sub>2</sub>, 313.2162; found, 313.2164; HPLC: 92% ee, CHIRALCEL ODR, 0.5% isopropanol/hexanes, 0.5 mL/min, UV: 210 nm, *t*<sub>R</sub>: 10.1 min (minor), 19.7 min (major).

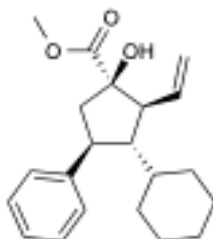

**(+)-(1*R*,2*S*,3*R*,4*S*)-methyl 3-cyclohexyl-1-hydroxy-4-phenyl-2-vinylcyclopentanecarboxylate (18c).**

Prepared by *General Procedure 1.2.1* with **6** (121 mg, 0.60 mmol, 1.2 equiv), **17c** (77 mg, 0.50 mmol, 1.0 equiv), Rh<sub>2</sub>(*R*-DOSP)<sub>4</sub> (0.9 mg, 0.0005 mmol, 0.1 mol %), and CaCl<sub>2</sub> (111 mg, 1.0 mmol, 2.0 equiv), heating to 125 °C for 40 h. Purification by flash chromatography (SiO<sub>2</sub>, pentane/Et<sub>2</sub>O, 12:1) afforded the title compound as a white solid (115 mg, 70% yield).

mp = 80–82 °C; [α]<sub>D</sub><sup>20</sup> +4.1° (*c* 1.89, CHCl<sub>3</sub>); <sup>1</sup>H NMR (400 MHz, CDCl<sub>3</sub>): δ 7.34-7.36 (m, 2H), 7.27-7.31 (m, 2H), 7.16-7.20 (m, 1H), 5.82 (m, 1H), 5.14 (dd, *J* = 10.4, 1.6 Hz, 1H), 5.03 (m, 1H), 3.79 (s, 3H), 3.17 (s, 1H), 3.10 (ddd, *J* = 10.8, 6.8, 6.8 Hz, 1H), 2.72-2.79 (m, 2H), 2.27-2.33 (m, 1H), 1.88 (dd, *J* = 14.2, 6.8 Hz, 1H), 1.56-1.66 (m, 3H), 1.47 (m, 2H), 1.31-1.39 (m, 1H), 0.95-1.26 (m, 4H), 0.79-0.89 (m, 1H); <sup>13</sup>C NMR (100 MHz, CDCl<sub>3</sub>): δ 176.7, 146.2, 136.8, 128.6, 128.3, 126.2, 118.3, 83.5, 57.0, 56.0, 53.0, 47.2, 46.3, 38.2, 30.6, 30.5, 27.2, 27.2, 26.9; IR (neat): 3513, 3026, 2921, 2851, 1727, 1639, 1601, 1495, 1440 cm<sup>-1</sup>; HRMS (*m/z*): [M+Na]<sup>+</sup> calcd for C<sub>21</sub>H<sub>28</sub>NaO<sub>3</sub>, 351.1931; found, 351.1934; HPLC: 90% ee, CHIRALCEL ODR, 0.5% isopropanol/hexanes, 0.5 mL/min, UV: 210 nm, *t*<sub>R</sub>: 11.1 min (major), 17.4 min (minor).

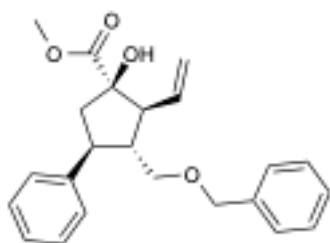

**(+)-(1*R*,2*S*,3*R*,4*S*)-methyl 3-((benzyloxy)methyl)-1-hydroxy-4-phenyl-2-vinylcyclopentanecarboxylate (18d)**

Prepared by *General Procedure 1.2.1* with **6** (121 mg, 0.60 mmol, 1.2 equiv), **17d** (96 mg, 0.50 mmol, 1.0 equiv), Rh<sub>2</sub>(*R*-DOSP)<sub>4</sub> (0.9 mg, 0.0005 mmol, 0.1 mol %), and CaCl<sub>2</sub> (111 mg, 1.0

mmol, 2.0 equiv), heating to 125 °C for 36 h. Purification by flash chromatography (SiO<sub>2</sub>, pentane/Et<sub>2</sub>O, 6:1) afforded the title compound as a pale yellow oil (101 mg, 55% yield).

$[\alpha]_D^{20} +1.9^\circ$  (*c* 1.08, CHCl<sub>3</sub>); <sup>1</sup>H NMR (400 MHz, CDCl<sub>3</sub>): δ 7.37-7.24 (m, 9H), 7.22-7.16 (m, 1H), 5.79 (ddd, *J* = 17.3, 10.3, 8.9 Hz, 1H), 5.17 (dd, *J* = 10.3, 2.0 Hz, 1H), 5.09 (dd, *J* = 17.3, 1.7 Hz, 1H), 4.50-4.37 (m, 2H), 3.81 (s, 3H), 3.42-3.31 (m, 3H), 3.24 (d, *J* = 0.8 Hz, 1H), 2.97 (dd, *J* = 12.0, 8.9 Hz, 1H), 2.84 (dd, *J* = 14.3, 11.2 Hz, 1H), 2.36-2.25 (m, 1H), 2.02 (dd, *J* = 14.4, 6.9 Hz, 1H); <sup>13</sup>C NMR (100 MHz, CDCl<sub>3</sub>): δ 176.7, 145.0, 138.8, 134.5, 128.6, 128.5, 128.2, 127.8, 127.7, 126.4, 119.3, 83.0, 73.2, 67.3, 56.0, 53.1, 52.7, 46.0, 45.2; IR (neat): 3521, 3063, 2979, 2951, 2854, 2790, 1729, 1638, 1602, 1495, 1455, 1437 cm<sup>-1</sup>; HRMS (*m/z*): [M+Na]<sup>+</sup> calcd for C<sub>23</sub>H<sub>26</sub>NaO<sub>4</sub>, 389.1723; found, 389.1726; HPLC: 92% ee, CHIRALPAK ADH, 1.0% isopropanol/hexanes, 1.0 mL/min, UV: 210 nm, *t*<sub>R</sub>: 17.9 min (major), 24.7 min (minor).

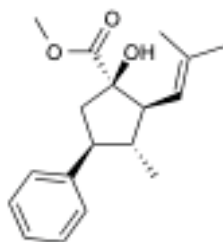

**(-)-(1*R*,2*R*,3*R*,4*S*)-methyl 1-hydroxy-3-methyl-2-(2-methylprop-1-en-1-yl)-4-phenylcyclopentanecarboxylate (20a)**

Prepared by *General Procedure 1.2.1* with **6** (121 mg, 0.60 mmol, 1.2 equiv), **19a** (57 mg, 0.50 mmol, 1.0 equiv), Rh<sub>2</sub>(*R*-DOSP)<sub>4</sub> (0.9 mg, 0.0005 mmol, 0.1 mol %), and CaCl<sub>2</sub> (111 mg, 1.0 mmol, 2.0 equiv), heating to 125 °C for 48 h. Purification by flash chromatography (SiO<sub>2</sub>, pentane/Et<sub>2</sub>O, 12:1) afforded the title compound as a colorless oil (102 mg, 71% yield).

$[\alpha]_D^{20} -2.1^\circ$  (*c* 1.82, CHCl<sub>3</sub>); <sup>1</sup>H NMR (400 MHz, CDCl<sub>3</sub>): δ 7.30-7.36 (m, 4H), 7.19-7.25 (m, 1H), 5.11 (d, *J* = 10.0 Hz, 1H), 3.80 (s, 3H), 3.06 (s, 1H), 2.68-2.89 (m, 3H), 2.05-2.15 (m, 1H), 2.08 (dd, *J* = 13.4, 4.8 Hz, 1H), 1.77 (s, 3H), 1.59 (s, 3H), 0.84 (d, *J* = 6.8 Hz, 3H); <sup>13</sup>C NMR

(100 MHz, CDCl<sub>3</sub>):  $\delta$  177.3, 144.6, 136.9, 128.6, 128.0, 126.4, 120.8, 82.5, 56.5, 53.0, 52.6, 48.0, 46.8, 26.3, 18.5, 16.1; FTIR (neat): 3525, 3061, 3027, 2951, 2922, 2866, 1728, 1602, 1495, 1455, 1436 cm<sup>-1</sup>; HRMS (*m/z*): [M+Na]<sup>+</sup> calcd for C<sub>18</sub>H<sub>24</sub>NaO<sub>3</sub>, 311.1618; found, 311.1618; HPLC: 95% ee, CHIRALCEL ODR, 1.0% isopropanol/hexanes, 1.0 mL/min, UV: 210 nm, *t*<sub>R</sub>: 4.9 min (minor), 6.8 min (major).

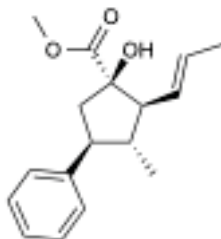

**(-)-(1*R*,2*S*,3*R*,4*S*)-methyl 1-hydroxy-3-methyl-4-phenyl-2-((*E*)-prop-1-en-1-yl)cyclopentanecarboxylate (20b)**

Prepared by *General Procedure 1.2.1* with **6** (121 mg, 0.60 mmol, 1.2 equiv), **19b** (51 mg, 0.50 mmol, 1.0 equiv), Rh<sub>2</sub>(*R*-DOSP)<sub>4</sub> (0.9 mg, 0.0005 mmol, 0.1 mol %), and CaCl<sub>2</sub> (111 mg, 1.0 mmol, 2.0 equiv), heating to 125 °C for 44 h. Purification by flash chromatography (SiO<sub>2</sub>, pentane/Et<sub>2</sub>O, 11:1) afforded the title compound as a colorless oil (89 mg, 71% yield).

[ $\alpha$ ]<sub>D</sub><sup>20</sup> -3.0° (*c* 1.03, CHCl<sub>3</sub>); <sup>1</sup>H NMR (400 MHz, CDCl<sub>3</sub>):  $\delta$  7.34-7.28 (m, 4H), 7.24-7.17 (m, 1H), 5.51-5.45 (m, 1H), 5.44-5.35 (m, 1H), 3.80 (s, 3H), 3.08 (s, 1H), 2.85-2.77 (m, 1H), 2.76-2.67 (m, 1H), 2.37 (dd, *J* = 11.7, 8.4 Hz, 1H), 2.16-2.05 (m, 1H), 1.98 (dd, *J* = 13.7, 7.5 Hz, 1H), 1.70 (dd, *J* = 6.1, 1.2 Hz, 3H), 0.85 (d, *J* = 6.5 Hz, 3H); <sup>13</sup>C NMR (100 MHz, CDCl<sub>3</sub>):  $\delta$  177.1, 144.5, 130.1, 128.6, 128.0, 127.0, 126.4, 82.7, 61.0, 53.0, 52.4, 46.7, 46.6, 18.6, 16.2; IR (neat): 3526, 3027, 2952, 2921, 2866, 1731, 1602, 1495, 1455, 1437 cm<sup>-1</sup>; HRMS (*m/z*): [M+Na]<sup>+</sup> calcd for C<sub>17</sub>H<sub>22</sub>NaO<sub>3</sub>, 297.1461; found, 297.1461; HPLC: 95% ee, CHIRALCEL ODR, 0.5% isopropanol/hexanes, 0.5 mL/min, UV: 210 nm, *t*<sub>R</sub>: 9.9 min (minor), 14.6 min (major).



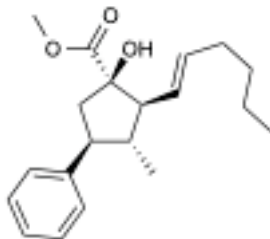

**(+)-(1R,2S,3R,4S)-methyl 2-((E)-hex-1-en-1-yl)-1-hydroxy-3-methyl-4-phenylcyclopentanecarboxylate (20c)**

Prepared by *General Procedure 1.2.1* with **6** (121 mg, 0.60 mmol, 1.2 equiv), **19c** (71 mg, 0.50 mmol, 1.0 equiv), Rh<sub>2</sub>(R-DOSP)<sub>4</sub> (0.9 mg, 0.0005 mmol, 0.1 mol %), and CaCl<sub>2</sub> (111 mg, 1.0 mmol, 2.0 equiv), heating to 125 °C for 48 h. Purification by flash chromatography (SiO<sub>2</sub>, pentane/Et<sub>2</sub>O, 15:1) afforded the title compound as a colorless oil (106 mg, 67% yield).

[ $\alpha$ ]<sub>D</sub><sup>20</sup> +1.2° (*c* 0.65, CHCl<sub>3</sub>); <sup>1</sup>H NMR (400 MHz, CDCl<sub>3</sub>):  $\delta$  7.26-7.35 (m, 4H), 7.20 (dq, *J* = 8.6, 5.1, 4.2 Hz, 1H), 5.48 (dt, *J* = 15.4, 6.5 Hz, 1H), 5.36 (dd, *J* = 15.5, 8.5 Hz, 1H), 3.80 (s, 3H), 3.07 (s, 1H), 2.66-2.89 (m, 3H), 2.37 (dd, *J* = 11.8, 8.5 Hz, 1H), 1.94-2.18 (m, 2H), 1.25-1.38 (m, 5H), 0.89 (t, *J* = 7.1 Hz, 3H), 0.85 (d, *J* = 6.5 Hz, 3H); <sup>13</sup>C NMR (100 MHz, CDCl<sub>3</sub>):  $\delta$  176.7, 144.6, 135.8, 128.6, 128.0, 126.4, 125.7, 82.8, 61.2, 53.0, 52.5, 46.7, 46.5, 32.7, 31.8, 22.3, 16.2, 14.1; IR (neat): 3527, 3027, 2953, 2925, 2870, 1729, 1602, 1495, 1455, 1436 cm<sup>-1</sup>; HRMS (*m/z*): [M+Na]<sup>+</sup> calcd for C<sub>20</sub>H<sub>28</sub>NaO<sub>3</sub>, 339.1931; found, 339.1931; HPLC: 94% ee, CHIRALPAK ADH, 0.5% isopropanol/hexanes, 1.0 mL/min, UV: 210 nm, *t*<sub>R</sub>: 8.9 min (major), 10.3 min (minor).

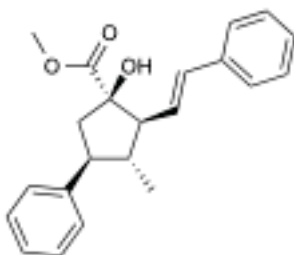

**(+)-(1R,2S,3R,4S)-methyl 1-hydroxy-3-methyl-4-phenyl-2-((E)-styryl)cyclopentanecarboxylate (20d)**

Prepared by *General Procedure 1.2.1* with **6** (121 mg, 0.60 mmol, 1.2 equiv), **19d** (81 mg, 0.50 mmol, 1.0 equiv), Rh<sub>2</sub>(*R*-DOSP)<sub>4</sub> (0.9 mg, 0.0005 mmol, 0.1 mol %), and CaCl<sub>2</sub> (111 mg, 1.0 mmol, 2.0 equiv), heating to 125 °C for 48 h. Purification by flash chromatography (SiO<sub>2</sub>, pentane/Et<sub>2</sub>O, 9:1) afforded the title compound as a pale yellow solid (134 mg, 80% yield).

mp = 79–82 °C; [α]<sub>D</sub><sup>20</sup> +9.2° (*c* 1.19, CHCl<sub>3</sub>); <sup>1</sup>H NMR (400 MHz, CDCl<sub>3</sub>): δ 7.28-7.39 (m, 8H), 7.19-7.24 (m, 2H), 6.41 (d, *J* = 16.0 Hz, 1H), 6.23 (dd, *J* = 16.0, 8.9 Hz, 1H), 3.81 (s, 3H), 3.28 (s, 1H), 2.73-2.94 (m, 2H), 2.60 (dd, *J* = 11.7, 9.0 Hz, 1H), 2.26 (m, 1H), 2.06 (dd, *J* = 8.0, 8.0 Hz, 1H), 0.91 (d, *J* = 6.5 Hz, 3H); <sup>13</sup>C NMR (100 MHz, CDCl<sub>3</sub>): δ 176.8, 144.4, 137.2, 133.7, 128.7, 128.7, 128.0, 127.6, 126.5, 126.5, 126.2, 82.9, 61.4, 53.2, 52.5, 47.2, 47.0, 16.2; IR (neat): 3509, 3026, 2952, 2866, 1728, 1601, 1495, 1450, 1436 cm<sup>-1</sup>; HRMS (*m/z*): [M+Na]<sup>+</sup> calcd for C<sub>22</sub>H<sub>24</sub>NaO<sub>3</sub>, 359.1618; found, 359.1618; HPLC: 95% ee, CHIRALPAK ADH, 1.0% isopropanol/hexanes, 1.0 mL/min, UV: 230 nm, *t*<sub>R</sub>: 18.5 min (minor), 19.9 min (major).

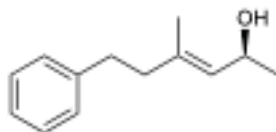

**(*S,E*)-4-methyl-6-phenylhex-3-en-2-ol (23c)**

The carbometallation procedure for the synthesis of *racemic* **23c** was conducted in accordance with the literature procedure<sup>78</sup> using Cp<sub>2</sub>ZrCl<sub>2</sub> (8.8 g, 30 mmol, 3.0 equiv), AlMe<sub>3</sub> (2.0 M in hexanes, 20 mL, 40 mmol, 4.0 equiv), 4-phenyl-1-butyne (1.75 g, 13 mmol, 1.3 equiv), and acetaldehyde (0.44 g, 10 mmol, 1.0 equiv) and purified by column chromatography (SiO<sub>2</sub>, hexanes/ether, 3:1) to afford *racemic* **23c** as a colorless oil (1.5 g, 78% yield). Kinetic resolution was conducted in accordance with the literature procedure<sup>74</sup> using **23c** (1.0 g, 5.3 mmol, 1.0

equiv), Amano AK Lipase (0.5 g, 50 wt %), vinyl acetate (2.9 mL, 32 mmol, 6.0 equiv), and activated 4 Å molecular sieves (1.0 g, 100 wt %) in hexanes (100 mL) for 24 h. Purification by column chromatography (SiO<sub>2</sub>, hexanes/ether, 3:1) afforded the title compound as a colorless oil (0.48g, 48% yield).

$[\alpha]_D^{20} -11.0^\circ$  (*c* 2.05, CHCl<sub>3</sub>); <sup>1</sup>H NMR (400 MHz, CDCl<sub>3</sub>):  $\delta$  7.33-7.23 (m, 2H), 7.23-7.13 (m, 3H), 5.25-5.12 (m, 1H), 5.46 (dq, *J* = 8.4, 6.2 Hz, 1H), 2.77-2.67 (m, 2H), 2.36-2.23 (m, 2H), 1.73 (d, *J* = 1.2 Hz, 3H), 1.20 (d, *J* = 6.2 Hz, 3H); <sup>13</sup>C NMR (100 MHz, CDCl<sub>3</sub>):  $\delta$  142.1, 137.1, 129.8, 128.6, 128.5, 126.0, 64.9, 41.5, 34.5, 23.7, 16.7; IR (neat): 3351, 3026, 2969, 2925, 2858, 1602, 1495, 1453 cm<sup>-1</sup>; HRMS (*m/z*): [M+H]<sup>+</sup> calcd for C<sub>13</sub>H<sub>19</sub>O, 191.1430; found, 191.1432; HPLC: 99% ee, DIACEL OJ-H, 1.0% isopropanol/hexanes, 1.0 mL/min, UV: 230 nm, *t*<sub>R</sub>: 21.6 min (minor), 26.4 min (major).

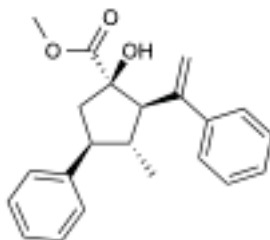

**(+)-(1R,2R,3R,4S)-methyl 1-hydroxy-3-methyl-4-phenyl-2-(1-phenylvinyl)cyclopentanecarboxylate (24a)**

Prepared by *General Procedure 1.2.1* with **6** (121 mg, 0.60 mmol, 1.2 equiv), **23a** (81 mg, 0.50 mmol, 1.0 equiv), Rh<sub>2</sub>(*R*-DOSP)<sub>4</sub> (0.9 mg, 0.0005 mmol, 0.1 mol %), and CaCl<sub>2</sub> (111 mg, 1.0 mmol, 2.0 equiv), heating to 125 °C for 20 h. Purification by flash chromatography (SiO<sub>2</sub>, pentane/Et<sub>2</sub>O, 7:1) afforded the title compound as a white solid (146 mg, 87% yield).

mp = 110–115 °C;  $[\alpha]_D^{20} +48.2^\circ$  (*c* 3.40, CHCl<sub>3</sub>); <sup>1</sup>H NMR (400 MHz, CDCl<sub>3</sub>):  $\delta$  7.13-7.50 (m, 10H), 5.52 (s, 1H), 5.19 (s, 1H), 3.19 (s, 3H), 3.17 (d, *J* = 15.4 Hz, 1H), 2.98 (s, 1H), 2.81-2.93 (m, 1H), 2.36-2.46 (m, 1H), 2.06 (dd, *J* = 19.2, 12.8 Hz, 1H), 1.02 (d, *J* = 6.4 Hz, 3H); <sup>13</sup>C NMR

(100 MHz, CDCl<sub>3</sub>):  $\delta$  176.2, 144.6, 144.6, 142.5, 128.7, 128.4, 128.1, 127.8, 127.4, 127.0, 126.6, 117.0, 80.4, 61.8, 52.4, 51.8, 46.2, 45.5, 16.1; IR (neat): 3468, 3028, 2952, 1728, 1600, 1494, 1447 cm<sup>-1</sup>; HRMS (*m/z*): [M+Na]<sup>+</sup> calcd for C<sub>22</sub>H<sub>24</sub>NaO<sub>3</sub>, 359.1618; found, 359.1621; HPLC: 99% ee, CHIRALCEL ODR, 1.0% isopropanol/hexanes, 1.0 mL/min, UV: 230 nm, *t*<sub>R</sub>: 7.1 min (minor), 8.4 min (major).

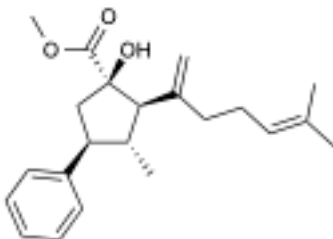

**(+)-(1*R*,2*R*,3*R*,4*S*)-methyl 1-hydroxy-3-methyl-2-(6-methylhepta-1,5-dien-2-yl)-4-phenylcyclopentanecarboxylate (24b)**

Prepared by *General Procedure 1.2.1* with **6** (121 mg, 0.60 mmol, 1.2 equiv), **23b** (84 mg, 0.50 mmol, 1.0 equiv), Rh<sub>2</sub>(*R*-DOSP)<sub>4</sub> (0.9 mg, 0.0005 mmol, 0.1 mol %), and CaCl<sub>2</sub> (111 mg, 1.0 mmol, 2.0 equiv), heating to 125 °C for 20 h. Purification by flash chromatography (SiO<sub>2</sub>, pentane/Et<sub>2</sub>O, 15:1) afforded the title compound as a colorless oil (146 mg, 85% yield).

[ $\alpha$ ]<sub>D</sub><sup>20</sup> +2.4° (*c* 1.42, CHCl<sub>3</sub>); <sup>1</sup>H NMR (400 MHz, CDCl<sub>3</sub>):  $\delta$  7.29-7.33 (m, 4H), 7.19-7.24 (m, 1H), 5.14 (d, *J* = 1.2 Hz, 1H), 5.06-5.10 (m, 1H), 4.93 (s, 1H), 3.78 (s, 3H), 2.89 (s, 1H), 2.83-2.89 (m, 1H), 2.77 (ddd, *J* = 10.2, 8.0, 8.0 Hz, 1H), 2.56 (d, *J* = 12.4 Hz, 1H), 2.23-2.32 (m, 1H), 2.09-2.20 (m, 1H), 1.93-2.08 (m, 3H), 1.82-1.89 (m, 1H), 1.68 (s, 3H), 1.61 (s, 3H), 0.86 (d, *J* = 6.4 Hz, 3H); <sup>13</sup>C NMR (100 MHz, CDCl<sub>3</sub>):  $\delta$  177.0, 145.0, 144.3, 132.1, 128.6, 128.1, 126.5, 123.9, 114.0, 80.6, 62.7, 52.8, 51.8, 46.7, 45.5, 37.3, 26.6, 25.9, 17.9, 16.1; IR (neat): 3501, 3027, 2952, 2925, 2969, 1730, 1640, 1602, 1495, 1455, 1436 cm<sup>-1</sup>; HRMS (*m/z*): [M+Na]<sup>+</sup> calcd for C<sub>22</sub>H<sub>30</sub>NaO<sub>3</sub>, 365.2093; found, 365.2091; HPLC: 99% ee, CHIRALCEL ODR, 0.3% isopropanol/hexanes, 0.5 mL/min, UV: 210 nm, *t*<sub>R</sub>: 9.2 min (minor), 13.5 min (major).

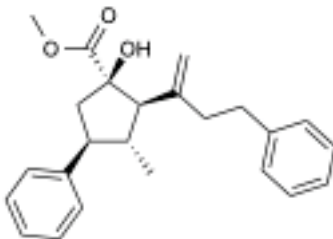

**(+)-(1*R*,2*R*,3*R*,4*S*)-methyl 1-hydroxy-3-methyl-4-phenyl-2-(4-phenylbut-1-en-2-yl)cyclopentanecarboxylate (24c)**

Prepared by *General Procedure 1.2.1* with **6** (121 mg, 0.60 mmol, 1.2 equiv), **23c** (95 mg, 0.50 mmol, 1.0 equiv), Rh<sub>2</sub>(*R*-DOSP)<sub>4</sub> (0.9 mg, 0.0005 mmol, 0.1 mol %), and CaCl<sub>2</sub> (111 mg, 1.0 mmol, 2.0 equiv), heating to 125 °C for 16 h. Purification by flash chromatography (SiO<sub>2</sub>, pentane/Et<sub>2</sub>O, 8:1) afforded the title compound as a white solid (157 mg, 86% yield).

mp = 74–77 °C; [α]<sub>D</sub><sup>20</sup> +1.2° (*c* 1.09, CHCl<sub>3</sub>); <sup>1</sup>H NMR (400 MHz, CDCl<sub>3</sub>): δ 7.37–7.24 (m, 6H), 7.24–7.14 (m, 4H), 5.19 (s, 1H), 4.96 (s, 1H), 3.77 (s, 3H), 2.96–2.72 (m, 4H), 2.72–2.58 (m, 2H), 2.37–2.22 (m, 2H), 2.22–2.11 (m, 1H), 2.06 (dd, *J* = 13.7, 7.6 Hz, 1H), 0.87 (d, *J* = 6.4 Hz, 3H); <sup>13</sup>C NMR (100 MHz, CDCl<sub>3</sub>): δ 177.0, 144.6, 144.2, 141.9, 128.6, 128.5, 128.5, 128.1, 126.6, 126.1, 114.4, 80.7, 62.8, 52.9, 51.7, 46.7, 45.4, 39.0, 34.5, 16.1; IR (neat): 3534, 3084, 3061, 3026, 2950, 2925, 2867, 1729, 1602, 1495, 1454, 1435 cm<sup>-1</sup>; HRMS (*m/z*): [M+H]<sup>+</sup> calcd for C<sub>24</sub>H<sub>29</sub>O<sub>3</sub>, 365.2111; found, 365.2117; HPLC: 99% ee, DACH DNB, 0.5% isopropanol/hexanes, 1.0 mL/min, UV: 230 nm, *t*<sub>R</sub>: 11.2 min (minor), 14.7 min (major).

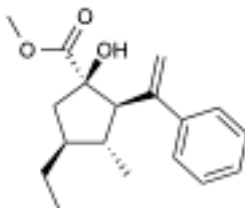

**(+)-(1*R*,2*R*,3*R*,4*S*)-methyl 4-ethyl-1-hydroxy-3-methyl-2-(1-phenylvinyl)cyclopentanecarboxylate (24d)**

Prepared by *General Procedure 1.2.1* with **22** (154 mg, 1.0 mmol, 2.0 equiv), **23a** (81 mg, 0.50 mmol, 1.0 equiv),  $\text{Rh}_2(\text{R-DOSP})_4$  (0.9 mg, 0.0005 mmol, 0.1 mol %), and  $\text{CaCl}_2$  (111 mg, 1.0 mmol, 2.0 equiv), heating to 125 °C for 20 h. Purification by flash chromatography ( $\text{SiO}_2$ , pentane/ $\text{Et}_2\text{O}$ , 7:1) afforded the title compound as a white solid (130 mg, 90% yield).

mp = 48–52 °C;  $[\alpha]_D^{20} +20.6^\circ$  ( $c$  0.90,  $\text{CHCl}_3$ );  $^1\text{H}$  NMR (400 MHz,  $\text{CDCl}_3$ ):  $\delta$  7.35–7.18 (m, 5H), 5.49 (s, 1H), 5.16 (s, 1H), 3.17 (s, 3H), 3.01 (d,  $J = 12.0$  Hz, 1H), 2.78 (s, 1H), 2.63–2.50 (dd,  $J = 13.0, 9.0$  Hz, 1H), 2.04–1.91 (m, 1H), 1.79–1.51 (m, 3H), 1.33–1.22 (m, 1H), 1.10 (d,  $J = 6.4$  Hz, 3H), 0.93 (t,  $J = 7.4$  Hz, 3H);  $^{13}\text{C}$  NMR (100 MHz,  $\text{CDCl}_3$ ):  $\delta$  176.6, 145.0, 142.8, 128.3, 127.7, 127.0, 116.8, 80.3, 62.0, 52.2, 46.6, 43.5, 42.2, 27.5, 16.9, 12.7; IR (neat): 3527, 3055, 3025, 2957, 2929, 2873, 1730, 1626, 1493, 1437, 1377, 1237  $\text{cm}^{-1}$ ; HRMS ( $m/z$ ):  $[\text{M}+\text{H}]^+$  calcd for  $\text{C}_{18}\text{H}_{25}\text{O}_3$ , 289.1798; found, 289.1800; HPLC: 99% ee, DIACEL OD-H, 0.2% isopropanol/hexanes, 0.5 mL/min, UV: 230 nm,  $t_R$ : 8.4 min (minor), 8.9 min (major).

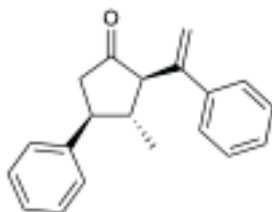

**(2R,3R,4S)-3-methyl-4-phenyl-2-(1-phenylvinyl)cyclopentanone (25)**

To a THF (0.5 mL) solution of **24a** (66 mg, 0.20 mmol, 1.0 equiv), was added lithium borohydride (2.0 M in THF, 0.21 mL, 0.42 mmol, 2.1 equiv) dropwise over 15 min at 0 °C. The reaction was gradually warmed to ambient temperature over 2 h. The reaction was then carefully quenched with pH 7.0 buffer solution (1 drop) and stirred at ambient temperature for an additional 30 min. To the crude mixture was added sodium periodate (430 mg, 2.0 mmol, 10 equiv) in a single portion, and the reaction was then heated in an oil bath to 60 °C for 4h. The reaction was again returned to ambient temperature, dilute with diethyl ether (20 mL), and

washed with a saturated, aqueous solution of sodium thiosulfate (3 x 5 mL). The organic was dried over sodium sulfate and concentrated *in vacuo*. Purification by flash chromatography (SiO<sub>2</sub>, pentane/Et<sub>2</sub>O, 15→10:1) afforded the title compound as a pale yellow oil (37 mg, 67% yield).

<sup>1</sup>H NMR (600 MHz, CDCl<sub>3</sub>): δ 7.38-7.27 (m, 7H), 7.27-7.18 (m, 3H), 5.48 (s, 1H), 5.20 (s, 1H), 3.02 (d, 1H), 2.94-2.81 (m, 2H), 2.51 (dd, *J* = 18.2, 11.5 Hz, 1H), 2.35-2.26 (m, 1H), 0.96 (d, *J* = 6.4 Hz, 3H); <sup>13</sup>C NMR (100 MHz, CDCl<sub>3</sub>): δ 215.5, 145.4, 141.4, 141.4, 128.9, 128.6, 127.8, 127.6, 127.2, 117.8, 66.0, 48.9, 47.4, 44.9, 16.8; IR (neat): *v*<sub>max</sub>/cm<sup>-1</sup> 3030, 2951, 2873, 1715, 1490, 1451; HRMS (*m/z*): [M+H]<sup>+</sup> calcd for C<sub>20</sub>H<sub>21</sub>O, 277.1587; found, 277.1585.

## Supplementary References

- (71) Still, W. C., Kahn, M. & Mitra, A. Rapid Chromatographic Technique for Preparative Separations with Moderate Resolution. *J. Org. Chem.* **1978**, *43*, 2923–2925.
- (72) Davies, J. M. L., Yang, J. & Manning, J. R. Direct synthesis of methyl 2-diazo-4-aryl-3-butenates and their application to the enantioselective synthesis of 4-aryl-4-(1-naphthyl)-2-butenates. *Tetrahedron: Asymmetry* **2006**, *17*, 665–673.
- (73) Davies, H. M. L., Bruzinski, P., Hutcheson, D. K. & Fall, M. J. Asymmetric Cyclopropanations by Rhodium(II) *N*-(Arylsulfonyl)prolinate Catalyzed Decomposition of Vinyldiazomethanes in the Presence of Alkenes. Practical Enantioselective Synthesis of the Four Stereoisomers of 2-Phenylcyclopropan-1-amino Acid. *J. Am. Chem. Soc.* **1996**, *118*, 6897–6907.
- (74) Xing, D. & Yang, D. Gold(I)-Catalyzed Highly Regio- and Stereoselective Decarboxylative Amination of Allylic *N*-Tosylcarbamates via Base-Induced Aza-Claisen Rearrangement in Water. *Org. Lett.* **2010**, *12*, 1068–1071.
- (75) McKew, J. C. & Kurth, M. J. Preparation of Low Molecular Weight, Optically Active Allylic Alcohols from (*S*)-(-)-Ethyl Lactate. *Org. Prep. Proc. Int.* **1993**, *25*, 125–130.
- (76) Roush, W. R., Straub, J. A. & Brown, R. J. Stereochemistry of the Epoxidations of Acyclic Allylic Amides. Applications toward the Synthesis of 2,3,6-Trideoxy-3-aminohexoses. *J. Org. Chem.* **1987**, *52*, 5127–5136.
- (77) Abate, A., Brenna, E., Fronza, G., Fugnati, C., Gatti, F. G., Serra, S. & Zardoni, E. Preparation of the Enantiomerically Enriched Isomers of the Odorous Cyclic Ethers *Clarycet*<sup>®</sup>, *Florol*<sup>®</sup>, and *Rhubafuran*<sup>®</sup> by Enzymatic Catalysis. *Helv. Chim. Acta.* **2004**, *87*, 765–780.
- (78) Spino, C., Granger, M.-C., Boisvert, L. & Beaulieu, C. Increased Felkin-Ahn selectivity in nucleophilic additions to  $\alpha$ -chiral aldehydes using vinylalanes. *Tetrahedron Lett.* **2002**, *43*, 4183–4185.
